# Supplementary material for: Health-related quality of life variations by sociodemographic factors and chronic conditions in three metropolitan cities of South Asia: the CARRS study
Source: PubMed Central journal article supplement (PMC5652573; doi:10.1136/bmjopen-2017-018424), 2017-10-15
Supplement: bmjopen-2017-018424.draft_revisions.pdf [file bmjopen-2017-018424.draft_revisions.pdf]

# BMJ Open

BMJ Open is committed to open peer review. As part of this commitment we make the peer review history of every article we publish publicly available.

When an article is published we post the peer reviewers' comments and the authors' responses online. We also post the versions of the paper that were used during peer review. These are the versions that the peer review comments apply to.

The versions of the paper that follow are the versions that were submitted during the peer review process. They are not the versions of record or the final published versions. They should not be cited or distributed as the published version of this manuscript.

BMJ Open is an open access journal and the full, final, typeset and author-corrected version of record of the manuscript is available on our site with no access controls, subscription charges or pay-per-view fees (<http://bmjopen.bmj.com>).

If you have any questions on BMJ Open's open peer review process please email [editorial.bmjopen@bmj.com](mailto:editorial.bmjopen@bmj.com)

# BMJ Open

## Health-related Quality of Life Variations by Socio-demographic Factors and Chronic Conditions in Urban South Asia: The CARRS Study

|                                 |                                                                                                                                                                                                                                                                                                                                                                                                                                                                                                                                                                                                                                                                                                                                                                                                                                                                                                                         |
|---------------------------------|-------------------------------------------------------------------------------------------------------------------------------------------------------------------------------------------------------------------------------------------------------------------------------------------------------------------------------------------------------------------------------------------------------------------------------------------------------------------------------------------------------------------------------------------------------------------------------------------------------------------------------------------------------------------------------------------------------------------------------------------------------------------------------------------------------------------------------------------------------------------------------------------------------------------------|
| Journal:                        | <i>BMJ Open</i>                                                                                                                                                                                                                                                                                                                                                                                                                                                                                                                                                                                                                                                                                                                                                                                                                                                                                                         |
| Manuscript ID                   | bmjopen-2017-018424                                                                                                                                                                                                                                                                                                                                                                                                                                                                                                                                                                                                                                                                                                                                                                                                                                                                                                     |
| Article Type:                   | Research                                                                                                                                                                                                                                                                                                                                                                                                                                                                                                                                                                                                                                                                                                                                                                                                                                                                                                                |
| Date Submitted by the Author:   | 27-Jun-2017                                                                                                                                                                                                                                                                                                                                                                                                                                                                                                                                                                                                                                                                                                                                                                                                                                                                                                             |
| Complete List of Authors:       | Singh, Kavita; All India Institute of Medical Sciences, Endocrinology & Metabolism<br>Kondal, Dimple; Publichealth Foundation of India<br>Shivashankar, Roopa; Public Health Foundation of India,<br>Ali, Mohammed; Emory University, Hubert Department of Global Health<br>Pradeepa, Rajendra; Madras Diabetes Research Foundation & Dr.Mohan's<br>Diabetes Specialities Centre, Epidemiology & Diabetology<br>Vamadevan, Ajay; Centre for Chronic Disease Control<br>Mohan, V; Madras Diabetes Research Foundation<br>Kadir, Muhammad ; Aga Khan University, Karachi, Pakistan, Community<br>Health Sciences<br>Sullivan, Mark; University of Washington School of Medicine,<br>Tandon, Nikhil; All India Institute of Medical Sciences,<br>Narayan, K; Emory University School of Public Health, Global Health<br>Prabhakaran, Dorairaj; Centre for Chronic Disease Control, ; Public Health<br>Foundation of India, |
| <b>Primary Subject Heading</b>: | Public health                                                                                                                                                                                                                                                                                                                                                                                                                                                                                                                                                                                                                                                                                                                                                                                                                                                                                                           |
| Secondary Subject Heading:      | Epidemiology, Global health, Health policy                                                                                                                                                                                                                                                                                                                                                                                                                                                                                                                                                                                                                                                                                                                                                                                                                                                                              |
| Keywords:                       | Health related Quality of Life (HRQOL), EQ5D, Chronic conditions, South Asia, Visual Analogue Scale                                                                                                                                                                                                                                                                                                                                                                                                                                                                                                                                                                                                                                                                                                                                                                                                                     |
|                                 |                                                                                                                                                                                                                                                                                                                                                                                                                                                                                                                                                                                                                                                                                                                                                                                                                                                                                                                         |

SCHOLARONE™  
Manuscripts

1  
2  
3  
4  
5  
6  
7  
8  
9  
10  
11  
12  
13  
14  
15  
16  
17  
18  
19  
20  
21  
22  
23  
24  
25  
26  
27  
28  
29  
30  
31  
32  
33  
34  
35  
36  
37  
38  
39  
40  
41  
42  
43  
44  
45  
46  
47  
48  
49  
50  
51  
52  
53  
54  
55  
56  
57  
58  
59  
60

**Title**

Health-related Quality of Life Variations by Socio-demographic Factors and Chronic  
Conditions in Urban South Asia: The CARRS Study

For peer review only

**Authors name, title, affiliation, address, contact details**

Ms. Kavita Singh, MSc, PhD Candidate

Research Scientist, Centre for Chronic Conditions and Injuries (CCCI), Public Health

Foundation of India (PHFI), and

Centre for Chronic Disease Control (CCDC), and

All India Institute of Medical Sciences, New Delhi

4th floor, Plot no. 47, Sector-44, Gurgaon - 122 002, Haryana

Office Landline - +91-124 - 4781400

Fax - +91-124-4722901, Mobile - +91-9899691150

Email: kavita@ccdcindia.org; kavita.singh@phfi.org

Dr. Dimple Kondal, MSc, PhD

Biostatistician, Centre for Chronic Conditions and Injuries,

Public Health Foundation of India

4th floor, Plot no. 47, Sector-44, Gurgaon - 122 002, Haryana

Office Landline - +91-124-4781400

Fax - +91-124-4722901, Mobile - +91-9899691150

Email: dimple.kondal@phfi.org

Dr. Roopa Shivashankar, MD, MSc

Senior Research Scientist and Associate Professor,

Centre for Chronic Conditions and Injuries,

Public Health Foundation of India, and

Centre for Chronic Disease Control

4th floor, Plot no. 47, Sector-44, Gurgaon - 122 002, Haryana

1  
2 Office Landline - +91-0124 - 4781400

3  
4 Fax - +91-0124-4722901, Mobile - +91-9899691150

5  
6 Email: roopa@ccdcindia.org; roopa.shivashankar@phfi.org  
7  
8  
9

10  
11 Dr. Mohammed K. Ali, MBChB, MSc, MBA

12 Associate Professor, Hubert Department of Global

13 Health and Department of Epidemiology,

14 Rollins School of Public Health, Emory University, and

15  
16 1518 Clifton Road NE, Room 7041, Atlanta, GA, 30322, USA

17  
18 Phone number: +1 404 727 9776

19  
20 Email: mkali@emory.edu  
21  
22  
23  
24  
25  
26  
27  
28

29 Dr. Rajendra Pradeepa, PhD

30  
31 Head, Research Operations, Madras Diabetes Research Foundation

32  
33 No.4, Conran Smith Road, Gopalapuram, Chennai 600086, India

34  
35 Phone number: +91-44-43968888

36  
37 Email: guhapradeepa@gmail.com  
38  
39  
40  
41  
42  
43

44 Dr. Vamadevan S Ajay, MPH, PhD

45 Senior Research Scientist, Centre for Chronic Conditions and Injuries, Public Health

46  
47 Foundation of India, and

48  
49 Centre for Chronic Disease Control

50  
51 4th Floor, Plot No. 47, Sector 44, Institutional Area

52  
53 Gurgaon - 122 002, Haryana

54  
55 Office Landline - +91-124-4781400

56  
57 Email: ajay@ccdcindia.org  
58  
59  
60

1  
2  
3  
4 Dr. Viswanathan Mohan, MD, PhD

5  
6 President and Director, Madras Diabetes Research Foundation

7  
8 No.4, Conran Smith Road, Gopalapuram, Chennai 600086, India

9  
10  
11 Phone number: +91-44-43968888

12  
13 Email: drmohans@diabetes.ind.in

14  
15  
16  
17 Dr. Muhammad M. Kadir, MBBS, FCPS

18  
19 Professor, Aga Khan University, Department of Community Health Sciences,

20  
21 Stadium Road, Karachi 74800, Pakistan

22  
23  
24 Phone number: +92 21 34930051

25  
26  
27 Email: masood.kadir@aku.edu

28  
29  
30  
31 Dr. Mark Daniel Sullivan, MD, PhD

32  
33 Professor, Psychiatry and Behavioral Sciences

34  
35 Adjunct Professor, Anesthesiology and Pain Medicine, Bioethics and Humanities

36  
37  
38 Medical Director, UW Telepain

39  
40 University of Washington, Box 356560, Seattle, WA 98195

41  
42  
43 Phone: +1-(206)685-3184, Fax: +1-(206) 221-5414

44  
45  
46 Email: sullimar@uw.edu

47  
48  
49 Dr. Nikhil Tandon, MD, PhD

50  
51 Professor and Head, Department of Endocrinology & Metabolism, All India Institute of Medical

52  
53  
54 Sciences,

55  
56 Biotechnology Block, 3rd Floor, Rm #312, Ansari Nagar, New Delhi - 110 029, India

57  
58  
59 Phone: +91-9818211663

Email: nikhil\_tandon@hotmail.com

Dr. KM Venkat Narayan, MD.

Ruth and O. C. Hubert, Professor of Global Health and Epidemiology, Rollins School of Public

Health,

Emory University

1518 Clifton Road NE, Room 7041, Atlanta, GA, 30322, USA

Phone number: +1 404 727 9776

Email: KNARAYA@emory.edu

Dr. Dorairaj Prabhakaran\*, MD, DM.

Vice President (Research and Policy),

Public Health Foundation of India, and

Director, Centre for Chronic Disease Control

4th floor, Plot no. 47, Sector-44, Gurgaon - 122 002, Haryana

Office Landline - 0124 - 4781400

Email: dprabhakaran@ccdcindia.org

\*Corresponding author

**Word count:**

Abstract: 251 words

Main article: 3,568

Number of figures: 2

Number of Tables: 3

Appendix: Tables: 3

**ABSTRACT [251 words]**

**Objectives:** Health-related quality of life (HRQOL) is a key indicator of health. However, HRQOL data from representative populations in South Asia are lacking. This study aims to describe HRQOL overall, by age, gender, and socio-economic status (SES), and examine the associations between selected chronic conditions and HRQOL in adults from three urban cities in South Asia.

**Methods:** We used data from 16287 adults aged  $\geq 20$  years from the baseline survey of the Centre for Cardiometabolic Risk Reduction in South Asia (CARRS) cohort (2010-11). HRQOL was measured using the European Quality of Life 5 dimension - Visual Analogue Scale (EQ5D-VAS), which measures health status on a scale of 0 (worst health status) – 100 (best possible health status).

**Results:** 16,284 participants completed EQ5D-VAS. Mean age was 42.4(+/-13.3) years and 52.4% were women. 14% of the respondents reported problems in mobility, and pain/discomfort domains. Mean VAS score was 74 (95% confidence interval [CI]: 73.7, 74.2). Significantly lower health status was found in elderly (64.1), women (71.6), unemployed (68.4), less educated (71.2) and low-income group (73.4). Individuals with chronic conditions reported worse health status than those without (67.4 vs. 76.2): Odds Ratio: 1.8 [95%CI: 1.61, 2.04].

**Conclusions:** The mean VAS (74.5) reported in our study is much lower than developed countries (82.5). Our data demonstrate significantly lower HRQOL in key demographic groups and those with chronic conditions, which are consistent with previous studies. These data provide insights on inequalities in population health status, and potentially reveal unmet needs in the community to guide health policies.

**Key words (5)**

Health related Quality of Life (HRQOL), EQ5D, Chronic conditions, South Asia, Visual Analogue Scale



## Strengths and limitations of this study

- This is the first population level health related quality of life (HRQOL) data from South Asia using EQ5D-VAS including three large metropolitan cities in India and Pakistan with a large sample size (16,284 adults aged  $\geq 20$  years).
- Our data provide the first baseline values to be used for monitoring population health status and analysed the relationships between selected chronic conditions and HRQOL.
- HRQOL data presented in this article could be used to complement national targets by providing a measure of chronic disease burden based on perceived health status rather than solely on mortality and disease prevalence.
- Due to the cross-sectional nature of the data, the causal relationship between socio-economic parameters/chronic conditions and HRQOL cannot be determined.
- Many chronic conditions (respiratory, locomotor, cancer, etc.) were not included in the survey. Therefore, the ranking of most severe health conditions and associated HRQOL is not complete.

## Main article [3568 words]

### Introduction

Health-related Quality of Life (HRQOL) is a multidimensional concept that provides a broader perspective of health through conveying an individual's ability to function in physical, mental, and social domains of life (1). HRQOL is thus an essential patient-centred outcome measure, which is useful to guide health policies (2, 3). HRQOL is preferred over other health indicators (life expectancy, mortality, morbidity) for measuring chronic disease burden as it incorporates both length and quality of life (4). In South Asia, chronic conditions (diabetes, hypertension and heart diseases) occur at an early age (5) with detrimental effects on length and quality of life (6, 7). In addition, episodes and fear of hypoglycaemia, recurrent heart attacks, stroke and other long-term complications (kidney diseases, diabetic retinopathy) are not always measured as such, though they have a substantial adverse impact on an individual's overall health status (8). Therefore, it is important to quantify the effect of chronic conditions on individuals HRQOL.

There are several disease-specific (Chronic respiratory distress questionnaire, Arthritis Impact Measurement Scale) and generic instruments (Short Form 36, World Health Organization (WHO) – Quality of Life questionnaire, and European Quality of Life Five Dimensions – Visual Analogue Scale (EQ5D-VAS)) available to measure population HRQOL (4, 9-18). However, the EQ5D-VAS is favoured because it is generic, not specific to a particular disease, and it not only includes multidimensional measures of health profile in five dimensions (mobility, self-care, usual activities, pain/discomfort and anxiety/depression), but also includes the single-dimensional measure VAS, to summarize overall health status (1). Also, EQ5D-VAS has been applied and validated for

1  
2 its use in many population surveys across the world, therefore, it makes the comparison  
3  
4 of health status across populations easier.  
5

6  
7 Data on population HRQOL across socioeconomic status (SES) from South Asia are  
8  
9 scarce, and little is known about the relative associations between different chronic  
10  
11 conditions and individual HRQOL. The Centre for Cardio-metabolic Risk Reduction in  
12  
13 South Asia (CARRS) study (19) had collected data on both EQ5D-VAS and selected  
14  
15 chronic conditions from a large representative population of adults in urban South Asia.  
16  
17 We used this opportunity to examine population HRQOL in this region. In this paper, we  
18  
19 describe the variations in HRQOL by age, gender, and SES, and explore the relationships  
20  
21 between selected chronic conditions and HRQOL in a representative sample of adults  
22  
23 aged  $\geq 20$  years from three metropolitan cities in India and Pakistan. We also analysed  
24  
25 the relationship between multidimensional EQ5D measures and single dimensional VAS  
26  
27 across major subgroups.  
28  
29  
30  
31

## 32 **Methods**

### 33 **Study design and setting**

34  
35  
36 We obtained data from the baseline cross-sectional survey of the CARRS cohort (2010-  
37  
38 11), which recruited a representative sample of non-pregnant adults aged  $\geq 20$  years  
39  
40 from three urban cities: Chennai, Delhi, and Karachi. These metropolitan cities with  
41  
42 large and heterogeneous populations in terms of demographic profile and economic  
43  
44 transitions offer unique opportunities to assess variations in health status across  
45  
46 different socio-economic groups. The detailed CARRS study design has been published  
47  
48 elsewhere (19). Briefly, a multi-stage cluster random sampling strategy was used with  
49  
50 wards (in Delhi and Chennai) or clusters (in Karachi) as the primary sampling units.  
51  
52 Using the WHO STEPS survey “Kish method”, two participants, one male and one female,  
53  
54  
55  
56  
57  
58  
59  
60

1 aged  $\geq 20$  years (non-pregnant) and meeting the study eligibility criteria, were selected  
2  
3  
4 from each randomly selected household (19).

### 6 **Study measures**

7  
8 Comprehensive and uniform data collection instruments were used to capture  
9  
10 measurements in all three sites. A summary of all surveillance measures, methods, and  
11  
12 instruments used in the study has been published in detail (19). Briefly, a questionnaire  
13  
14 was administered to collect information regarding demographic, socio-economic,  
15  
16 behavioural, and past and present health status of the participant.  
17

18  
19 Trained study staff measured anthropometric parameters (height, weight) using  
20  
21 standardized techniques and blood pressure (BP) twice at each participant's home or at  
22  
23 a medical camp organized in the community, after five minutes in a seated position  
24  
25 using an electronic BP measuring device (Omron Dailan Co., China). If the difference  
26  
27 between the first two systolic or diastolic BP readings was more than 10 mmHg or 5  
28  
29 mmHg, respectively, a third reading was taken. Average BP readings of the two/three  
30  
31 readings were recorded in the study database. Additionally, fasting blood glucose and  
32  
33 glycated haemoglobin (HbA1c) were measured. The overall response rates were 94.7%  
34  
35 for questionnaire completion and 84.3% for blood tests.  
36  
37

38  
39 Population health status was measured using the EQ5D-VAS questionnaire, which  
40  
41 consisted of two components; health state description and self-rated health status on  
42  
43 VAS. Health state description (profile) includes five dimensions (5D); mobility (walking  
44  
45 ability), self-care (ability to wash or dress by oneself), usual activities (ability to work,  
46  
47 study, housework), pain/discomfort, and anxiety/depression. The respondents self-rate  
48  
49 their level of severity for each dimension using three levels (EQ5D-3L): having no  
50  
51 problems, having some or moderate problems, or being unable to do/having extreme  
52  
53 problems. The respondents were asked to choose one of the statements which best  
54  
55 described their health status on the surveyed day. For example, three levels of 'mobility'  
56  
57  
58  
59  
60

1 dimension were phrased as "I have no problems in walking," "I have some problems in  
2 walking," and "I am confined to bed". Given the possible permutations of different  
3 domains and response types, there are potentially 243 (=3<sup>5</sup>) different health profiles.

4 For overall health status, the respondents evaluated their health status using the VAS.  
5 The VAS asks respondents to mark health status on the day of the interview on a scale of  
6 0 (worst health status) – 100 (best imaginable health status).  
7

8  
9  
10  
11  
12  
13  
14  
15  
16  
17  
18  
19  
20  
21  
22  
23  
24  
25  
26  
27  
28  
29  
30  
31  
32  
33  
34  
35  
36  
37  
38  
39  
40  
41  
42  
43  
44  
45  
46  
47  
48  
49  
50  
51  
52  
53  
54  
55  
56  
57  
58  
59  
60

*Covariates:* Self-reported age at baseline in completed years was used and categorized into 20-24, 25-34, 35-44, 45-54, 55-64, 65-74 and ≥75. Based on participant responses, we categorized employment status into employed, student, housewife, retired, and unemployed. Income class was grouped into three categories based on household monthly income: low-income (<10,000 INR), middle-income (10,000-20,000 INR) and high-income strata (>20,000 INR). We categorized highest education level attained into three categories - up to primary, secondary schooling, and graduates. The marital status was classified as: single, married, widowed, and divorced. Body mass index (Kg/m<sup>2</sup>) of ≤18 was used to define the underweight, and >18-25: normal weight, >25-30: overweight and ≥30: obese. Lifestyle habits like tobacco use was classified based on self-reports as never, former and current user. Data on chronic conditions consisted of self-reported hypertension, diabetes, heart disease, stroke, and kidney disease. In addition, diabetes was categorized into self-reported, newly diagnosed (defined by no self-reported diabetes and fasting blood glucose (FBG) of ≥126 mg/dl, or HbA1c ≥6.5%), pre-diabetes (no self-reported diabetes and FBG ≥100-125 mg/dl or HbA1c ≥5.7-6.4%) and normoglycemia (no self-reported diabetes and FBG<100 mg/dl and HbA1c<5.7%). Similarly, we classified hypertension as: self-reported, newly diagnosed (no self-reported hypertension and BP ≥140/90mmHg), prehypertension (no self-reported hypertension and BP: 120-139 / 80-89 mmHg) and normotensive (no history of hypertension and BP <120/80 mmHg).

## Ethical considerations

The CARRS study has obtained institutional ethics approval from each of the participating institutions: Public Health Foundation of India, All India Institute of Medical Sciences, New Delhi, Madras Diabetes Research Foundation, Chennai, Aga Khan University, Karachi and Rollins School of Public Health, Emory University, USA. Study participants provided written informed consent, before participation in the study.

## Analysis

We used Stata (version 14.0 SE; StataCorp, TX, USA) for data analysis. We used the 'svy' command for all analysis to account for the complex survey design (20). Before any of the survey estimation commands were used, the svyset command was used to specify the variables that described the stratification, sampling weight, and primary sampling unit variables. This analysis included data obtained from 16,284 study participants. All the responses coded as refused, unknown, or missing were treated as missing data. The frequency (percentages) and mean were reported to display the level of population health status and the sample characteristics. Percentages of those reporting any problems in EQ5D domains and mean VAS were stratified by respondent's demographic characteristics - age, gender, marital status, and SES - education, income, and employment status; and health-related indicators - presence of chronic conditions, were reported. Additionally, odds-ratios of moderate or severe health problems in people with and without chronic conditions was analysed using logistic regression. The model was adjusted for socio-demographic covariates (age, gender, marital status, education level, and household income). Linear regression was performed to explore the relationship between the VAS and the EQ5D measures across major subgroups. In the regression model, VAS was used as a dependent variable, and EQ5D measures were treated as independent variables.

## Study Results

### Characteristics of the study population

A total of 17,274 individuals in 10,002 households were approached in the three study sites (7,596 participants in Chennai, 5,420 in Delhi, 4,258 in Karachi). From these, a total of 16,287 participants were recruited (the overall response rate was 94.3% at the participant level; 6,906 Chennai [90.9%], 5,364 Delhi [98.9%], and 4,017 Karachi [94.3%]). Detailed baseline characteristics of the CARRS cohort is published elsewhere (21-24). Briefly, mean age was 42.4 (+/- 13.3), 52.4% were females, 61% completed secondary schooling, and the majority of respondents (72.5%) reported household income level <INR. 10,000 (US\$200). A third (66%) of the study population had BMI  $\geq 25$ , and one-fifth (20%) of the respondents reported current tobacco use and 37.5% had self-reported chronic conditions (hypertension, diabetes, heart disease, stroke or chronic kidney disease).

### Overall HRQOL by age and gender

A total of 16,284 study participants completed the EQ5D-VAS [99.9%]. Overall, the percentage of respondents reporting any problems in mobility and pain/discomfort (14% each) were higher than for other domains. Greater health problems were observed with higher age for both men and women (p-value <0.001). [Table 1]. Problems with mobility were higher with advancing age. However, problems with anxiety/depression did not show such trend. Average health status (VAS) reported by the CARRS cohort was 74.5 (95% CI 73.7 – 74.2). [Figure 1]. Women reported lower health status than men (71.6 vs.79.0).

74% of the respondents rated a perfect health profile with no difficulties in any EQ-5D domain, and 0.06% rated the worst health profile whereby they had difficulties with every EQ-5D domain. The distribution of the VAS scores was skewed in the direction of

1  
2 best-imagined health state. Only 0.5% respondents rated their health status on VAS  
3  
4 under 10, and 10% rated it under 50 [Appendix 1].  
5

### 6 7 **HRQOL and socio-economic status**

8  
9 **Table 2 and Figure 2** depicts the mean VAS, percentage, and odds of respondents  
10 reporting any problems in the five dimensions, across various sub-groups, respectively.  
11 Employed adults and students reported better health status than homemakers, retired,  
12 or unemployed participants. We observed almost equal health status in homemakers  
13 and retired people. Health status was also similar in the middle- and high-income  
14 groups, while it was significantly lower in the low-income group. Individuals with  
15 higher education (graduate and above) and high income had higher HRQOL than those  
16 with secondary or primary schooling and low-income class. Also, individuals with BMI  
17  $\geq 18-24$  Kg/m<sup>2</sup> reported better health status, than those with BMI  $\geq 25$  Kg/m<sup>2</sup>. Current  
18 tobacco users reported better health status than former tobacco users or non-users.  
19 However, in a stratified analysis of HRQOL in tobacco users by presence or absence of  
20 chronic conditions, tobacco users with chronic conditions reported worse health status  
21 than non-users.  
22  
23  
24  
25  
26  
27  
28  
29  
30  
31  
32  
33  
34  
35  
36

### 37 38 **HRQOL and chronic conditions**

39  
40 Overall, individuals with chronic conditions reported lower health status than those  
41 without chronic conditions. About half of the respondents with self-reported diabetes,  
42 hypertension, stroke, heart disease, or chronic kidney disease reported moderate or  
43 severe problems in all five domains (Table 2).  
44  
45  
46  
47  
48

49 **Table 3** presents the adjusted odds ratio of any problems (moderate or severe)  
50 comparing people with versus without chronic conditions, stratified by sex and cities.  
51  
52 Individuals with chronic conditions reported two times greater problems in mobility,  
53 usual activities domains, pain/discomfort, and anxiety/depression, than in individuals  
54 without chronic conditions.  
55  
56  
57  
58  
59  
60



1  
2 Further, a small proportion of individuals with chronic conditions, mostly those with  
3  
4 hypertension (10.5%) or diabetes (8.3%) reported having a perfect health state.  
5  
6

### 7 **Relationship between VAS and EQ5D measures across major sub-groups**

8  
9

10 We expected that each EQ5D dimension would have an independent relationship with  
11  
12 VAS since each of them represents a different aspect of HRQOL. Appendix 2 provides the  
13  
14 beta coefficients of the weighted regression models (i.e., with the application of the  
15  
16 population sampling weights). In the overall population, having any problems in  
17  
18 mobility, self-care, pain/discomfort, and anxiety/depression were associated with VAS  
19  
20 scores that were 10-12 points lower. This inverse relationship of lower VAS with higher  
21  
22 domain difficulties was larger in men, elderly (>60 years), low-income, less educated,  
23  
24 divorced, and high BMI individuals, compared to their respective counterparts. Tobacco  
25  
26 users who reported difficulties in all domains of EQ5D had lower VAS scores (indicating  
27  
28 lower quality of life). Kidney disease and stroke were the most disabling conditions on  
29  
30 all measures.  
31  
32  
33  
34  
35

### 36 **Discussion**

37  
38

39 Comparative assessments of HRQOL variations by socio-demographic factors and  
40  
41 chronic conditions aid in prioritizing public health targets for intervention. Results from  
42  
43 this study indicate that less than 10% of the respondents rated their health status as  
44  
45 100 (i.e. best imagined health state) on VAS. Mobility, pain/discomfort, and anxiety  
46  
47 /depression were the most commonly reported problems, with the extent of these  
48  
49 problems differing across population subgroup. Elderly (>60 years) and women  
50  
51 reported significantly greater problems in the mobility, pain/discomfort and  
52  
53 anxiety/depression domains.  
54  
55  
56  
57  
58  
59  
60

1  
2  
3  
4  
5  
6  
7  
8  
9  
10  
11  
12  
13  
14  
15  
16  
17  
18  
19  
20  
21  
22  
23  
24  
25  
26  
27  
28  
29  
30  
31  
32  
33  
34  
35  
36  
37  
38  
39  
40  
41  
42  
43  
44  
45  
46  
47  
48  
49  
50  
51  
52  
53  
54  
55  
56  
57  
58  
59  
60

The mean VAS in our study was 74.5, which is lower than reported by most western countries (82.5), but comparable to the results from other low- and middle-income countries (LMICs) (71.1 - 77.8) [Appendix 3] (25-28). Lower health status reported by urban South Asians can be interpreted in a number of ways. The lower scores may be related to generally lower reporting of HRQOL among this group. Alternatively, these scores may reflect morbidity and sub-optimal access to healthcare facilities to address health concerns. South Asians experience chronic conditions at relatively younger ages than other race/ethnic groups and the associated reductions in productivity and income levels may be manifested in these self-reported EQ5D-VAS scores.

Mobility is the dimension that has the highest rate of having problems (14-17%) in South Asia, which is comparable to results from other LMICs (29). However, problems in anxiety/depression are pretty low in South Asia when compared to the rest of the world; this could be due to under diagnoses of depression related problems or stigma attached to these health conditions. These patterns could also reflect differences in how adults in different parts of the world self-rate their health.

Worse health status in retired or homemakers, compared to employed persons may be related to being homebound or reflect underlying illnesses that may be the factor driving these participants to be homebound and not employed.

In terms of modifiable risk factors, maintaining a healthy BMI cut-off (18-25 Kg/m<sup>2</sup>) is favoured because, individuals with BMI <18 Kg/m<sup>2</sup> and ≥25 Kg/m<sup>2</sup>, reported greater problems in all five domains. Although, previous studies have shown that lower levels (intensity) of tobacco use are linked with higher HRQOL and regular tobacco users with worse health status (30, 31), in our study, former tobacco users reported lower HRQOL than current users. This finding may indicate reverse causality, i.e. former tobacco users after experiencing an illness would have quit smoking/tobacco. Further, supported by

1 the fact that tobacco users with chronic conditions or greater difficulties in EQ5D  
2 domains had lower VAS scores is suggestive that morbidity and not the habit of tobacco  
3 use per se are more closely related to participants' perception of health. However, a  
4 causal link between tobacco use and HRQOL cannot be confirmed in this cross-sectional  
5 study. Longitudinal analyses of the independent associations between the  
6 smoking/tobacco with HRQOL may provide a better understanding of this relationship.  
7  
8

9  
10  
11  
12  
13  
14  
15  
16 The lower health status reported by females, less educated, unemployed, and low-  
17 income groups may indicate higher levels of stress in these groups (17). Other potential  
18 contributing factors that are known to influence health status are living conditions,  
19 Gross domestic product (GDP) per capita, inequities in income distributions, and access  
20 to healthcare (32-37). Therefore, public health initiatives should focus on inter-sectoral  
21 approaches to address issues of education, generating more avenues for employment,  
22 and improving the quality of primary healthcare.  
23  
24  
25  
26  
27  
28  
29  
30  
31

32  
33 Notably, one in five individuals living with known hypertension or diabetes (average  
34 disease duration four years) still reported a perfect health state, indicating that these  
35 individuals may feel asymptomatic until they experience a clinical event. Also, very  
36 small proportions of patients with heart disease and stroke (with longer duration of  
37 illness; average nine years), reported perfect health states, suggesting that these  
38 individuals may have adapted to their conditions over time and maybe benefiting from  
39 treatment and self-care that improves their self-rated quality of life. However, we did  
40 not investigate whether these other factors like adherence influence quality life in those  
41 living with chronic conditions.  
42  
43  
44  
45  
46  
47  
48  
49  
50  
51  
52

53  
54 Due to the differences in statistical analyses, HRQOL measures, socio-demographic  
55 characteristics of the sample, and medical conditions selected, the results of this study  
56 may not be directly comparable to reports from other countries (38). Nevertheless, a  
57  
58  
59  
60

1 few differences and common findings are noteworthy. Individuals with stroke or  
2 chronic kidney disease rated the lowest health status, which is consistent with results  
3 reported from other studies done in China, Thailand, and Western populations (28, 39-  
4 42). Since the respondent's health status could be affected by how well the condition  
5 was managed, caution is needed in interpreting study results regarding the relative  
6 effect of chronic conditions on HRQOL (43-47). A more recent Canadian study  
7 conducted by Mo *et al.* indicated a strong relationship between low health utility index  
8 (HUI) scores and certain chronic conditions (48). The authors found that arthritis/  
9 rheumatism, heart disease, hypertension, cataracts, and diabetes had a negative impact  
10 on HRQOL. In the US, Medical Expenditure Panel Survey data based study reported that,  
11 after adjusting for socio-demographic variables, all of the selected chronic conditions  
12 were associated with lower EQ5D scores, with effects greatest for emphysema, followed  
13 by heart disease, stroke, high BP, diabetes, and asthma(49, 50).

14 Lastly, the issues of 'clinical' or 'policy' relevance of the difference in EQ5D measures  
15 needs much discourse. For example, if the VAS in two groups of the population is 5 or 10  
16 points different from each other, we will not be able to make a clinical judgment on how  
17 much these two groups would differ in their actual health status. These issues relate to  
18 determining a minimally significant difference/change in HRQOL needs investigation in  
19 future studies. Also, the findings of this study may not be replicable if researchers use a  
20 different HRQOL instrument (51-56), which can be tested in a future study.

21 To our knowledge, this is the first population level HRQOL data from South Asia using  
22 EQ5D-VAS including three large metropolitan cities in India and Pakistan with a large  
23 sample size that has used multistage cluster random sampling strategy and  
24 standardized protocols and measurement tools across sites. Our data provide the first  
25 baseline values to be used for monitoring population health status and analysed the

1 relationships between selected chronic conditions and HRQOL. This information could  
2 be used to complement national targets by providing a measure of chronic disease  
3 burden based on perceived health status rather than solely on mortality and disease  
4 prevalence. In our secondary data analysis, EQ5D and VAS measures correlated well,  
5 which confirms the convergent and discriminate validity of the EQ5D instrument.  
6  
7  
8  
9  
10  
11  
12

13  
14 There are several limitations to this study. First, due to the cross-sectional nature of the  
15 data, the causal relationship between socio-economic parameters/chronic conditions  
16 and HRQOL cannot be determined and is not implied. Second, many chronic conditions  
17 (respiratory, locomotor, cancer, etc.) were not included in the survey. Therefore, the  
18 ranking of most severe health conditions and associated HRQOL is not complete. Third,  
19 the selected chronic conditions were self-reported, and the study investigators did not  
20 examine the accuracy of information. However, this poses less of a threat to validity  
21 because self-reporting of heart diseases, stroke, and kidney diseases are pretty accurate  
22 in community surveys (57-60). Further, hypertension and diabetes were measured in  
23 this study using standardized methods. Lastly, EQ5D data were self-reported and the  
24 variation in how individuals perceive disability varies widely. However, this should be  
25 less of a problem given the large sample size in this study.  
26  
27  
28  
29  
30  
31  
32  
33  
34  
35  
36  
37  
38  
39  
40  
41  
42  
43

## 44 **Conclusion**

45  
46  
47 HRQOL appears to be lower with higher age and among women in South Asia. Our data  
48 demonstrates significantly lower HRQOL in key demographic groups and those with  
49 chronic conditions, which are consistent with previous studies. These data provide  
50 insights on inequalities in population health status, and potentially reveal unmet needs  
51 in the community to guide health policies.  
52  
53  
54  
55  
56  
57  
58  
59  
60

1  
2  
3  
4  
5 **Funding:** The CARRS Study was funded in whole or in part by the National Heart, Lung,  
6  
7 and Blood Institute of the National Institutes of Health, Department of Health and  
8  
9 Human Services (contract no. HHSN268200900026C) and the United Health Group  
10  
11 (Minneapolis, MN, USA). Roopa Shivashankar is supported by a Wellcome Trust  
12  
13 Capacity Strengthening Strategic Award Extension phase to the Public Health  
14  
15 Foundation of India and a consortium of UK universities (WT084754/Z/08/A).  
16  
17

18  
19 **Conflict of Interest:** All authors [KS, DK, RS, MKA, RP, VSA, VM, MMK, MDS, NT KMVN,  
20  
21 and DP) declare that they have no conflict of interest to report.  
22  
23

24 **Author's contribution:** KS, DP, MKA, RS, NT and KMVN conceptualized and designed  
25  
26 the study. KS wrote the first draft of the manuscript. KS and DK performed statistical  
27  
28 analysis. RS, VSA, MKA, RP, VM, MMK, MDS, NT, KMVN, and DP contributed significantly  
29  
30 in the revision of the manuscript. All authors have approved the submission of this  
31  
32 version of the manuscript.  
33  
34  
35  
36  
37  
38

39 **Data sharing statement:** KS, DK, and DP have access to study dataset and statistical  
40  
41 code. Any request for data sharing should be addressed to the corresponding author  
42  
43 (DP).  
44  
45  
46  
47  
48  
49  
50  
51  
52  
53  
54  
55  
56  
57  
58  
59  
60

## Tables

Table 1 - Percentage of respondents reporting moderate or severe problems in EQ5D domains, stratified by age and gender

| EQ5D Dimensions           | 20-24 years | 25-34 years | 35-44 years | 45-54 years | 55-64 years | 65-74 years | ≥75 years   | Overall     |
|---------------------------|-------------|-------------|-------------|-------------|-------------|-------------|-------------|-------------|
| <b>Overall (N)</b>        | 1179        | 3752        | 4672        | 3539        | 2005        | 878         | 262         | 16287       |
| Males (N)                 | 591         | 1614        | 2128        | 1723        | 1026        | 500         | 178         | 7760        |
| Females (N)               | 588         | 2138        | 2544        | 1816        | 979         | 378         | 84          | 8527        |
| <b>Mobility</b>           |             |             |             |             |             |             |             |             |
| All respondents (%)       | 5.3         | 8.3         | 13.6        | 18.1        | 23.5        | 31.2        | 39          | 14.6        |
| 95% CI                    | [4.0,7.0]   | [6.8,10.0]  | [11.7,15.9] | [16.1,20.3] | [20.8,26.4] | [27.5,35.2] | [32.7,45.6] | [13.3,15.9] |
| Male (%)                  | 2.9         | 3.6         | 6           | 8.7         | 17          | 20.5        | 34.7        | 8.2         |
| 95% CI                    | [1.5,5.6]   | [2.6,5.0]   | [4.8,7.3]   | [7.2,10.4]  | [14.1,20.4] | [16.7,24.9] | [27.5,42.7] | [7.3,9.2]   |
| Female (%)                | 7.8         | 11.8        | 20.1        | 26.9        | 30.6        | 45.6        | 48          | 20.3        |
| 95% CI                    | [5.9,10.2]  | [9.7,14.4]  | [17.1,23.4] | [24.0,29.9] | [26.5,35.1] | [40.8,50.6] | [36.2,60.1] | [18.5,22.3] |
| <b>Self-care</b>          |             |             |             |             |             |             |             |             |
| All respondents (%)       | 1.6         | 2.6         | 3.8         | 4.7         | 6.9         | 9           | 14.6        | 4.2         |
| 95% CI                    | [1.0,2.8]   | [2.0,3.5]   | [2.9,5.0]   | [3.8,5.7]   | [5.4,8.8]   | [6.9,11.8]  | [10.3,20.2] | [3.6,4.9]   |
| Male (%)                  | 1.2         | 1.5         | 1.7         | 2.7         | 5.1         | 5.2         | 14          | 2.6         |
| 95% CI                    | [0.4,3.6]   | [0.8,2.5]   | [1.0,2.9]   | [1.8,3.9]   | [3.1,8.2]   | [3.3,8.0]   | [8.9,21.5]  | [2.0,3.3]   |
| Female (%)                | 2.1         | 3.5         | 5.5         | 6.5         | 8.9         | 14.2        | 15.6        | 5.6         |
| 95% CI                    | [1.2,3.5]   | [2.5,5.0]   | [4.1,7.5]   | [5.2,8.2]   | [6.7,11.6]  | [10.6,18.7] | [9.4,24.9]  | [4.6,6.8]   |
| <b>Usual activities</b>   |             |             |             |             |             |             |             |             |
| All respondents (%)       | 2           | 3.5         | 4.8         | 7.1         | 10.7        | 16.6        | 23.1        | 6.0         |
| 95% CI                    | [1.2,3.2]   | [2.8,4.4]   | [3.8,5.9]   | [6.0,8.4]   | [8.9,12.8]  | [13.9,19.7] | [17.8,29.4] | [5.4,6.8]   |
| Male (%)                  | 1.3         | 1.4         | 1.8         | 3.2         | 6.4         | 11          | 19.7        | 3.2         |
| 95% CI                    | [0.5,3.7]   | [0.9,2.1]   | [1.2,2.7]   | [2.3,4.3]   | [4.8,8.6]   | [7.9,15.2]  | [13.8,27.2] | [2.7,3.9]   |
| Female (%)                | 2.6         | 5.1         | 7.2         | 10.7        | 15.4        | 24.1        | 30.3        | 8.5         |
| 95% CI                    | [1.6,4.3]   | [4.0,6.6]   | [5.6,9.2]   | [8.8,12.9]  | [12.3,19.1] | [20.4,28.1] | [20.7,42.0] | [7.4,9.7]   |
| <b>Pain/Discomfort</b>    |             |             |             |             |             |             |             |             |
| All respondents (%)       | 6           | 9.2         | 13.4        | 18.6        | 20.4        | 27.1        | 30.3        | 14.3        |
| 95% CI                    | [4.4,8.1]   | [7.7,10.9]  | [11.5,15.5] | [16.6,20.7] | [17.9,23.1] | [23.3,31.2] | [24.1,37.2] | [13.0,15.6] |
| Male (%)                  | 3.6         | 5.5         | 7.6         | 10.6        | 14.1        | 16.5        | 28          | 8.9         |
| 95% CI                    | [2.3,5.7]   | [4.0,7.3]   | [6.0,9.6]   | [9.1,12.4]  | [11.4,17.4] | [13.1,20.7] | [20.7,36.7] | [8.0,9.9]   |
| Female (%)                | 8.5         | 11.9        | 18.2        | 25.9        | 27.2        | 41.2        | 35.1        | 19.1        |
| 95% CI                    | [5.7,12.3]  | [9.8,14.5]  | [15.5,21.3] | [23.0,29.1] | [23.5,31.1] | [35.6,47.0] | [25.0,46.7] | [17.1,21.2] |
| <b>Anxiety/Depression</b> |             |             |             |             |             |             |             |             |
| All respondents (%)       | 4.9         | 5.8         | 7.6         | 9.9         | 10.9        | 13.7        | 18          | 8.1         |
| 95% CI                    | [3.7,6.6]   | [4.8,7.0]   | [6.5,8.9]   | [8.7,11.4]  | [9.4,12.7]  | [11.2,16.7] | [13.3,23.7] | [7.4,8.9]   |
| Male (%)                  | 3.7         | 4.1         | 5.4         | 6.7         | 8.7         | 7.6         | 15.7        | 5.9         |
| 95% CI                    | [2.2,6.0]   | [3.1,5.5]   | [4.3,6.8]   | [5.2,8.5]   | [6.8,11.0]  | [5.4,10.7]  | [10.7,22.6] | [5.2,6.7]   |
| Female (%)                | 6.2         | 7.0         | 9.5         | 13          | 13.4        | 21.9        | 22.7        | 10.1        |
| 95% CI                    | [4.4,8.6]   | [5.6,8.8]   | [7.9,11.4]  | [11.0,15.2] | [11.1,16.1] | [18.0,26.5] | [14.0,34.6] | [9.1,11.3]  |

**Abbreviations:** CI – confidence interval, EQ5D – European Quality of Life 5 dimension, N – number of participants

**Figure 1 - Mean self-rated health status using EQ5D-VAS of respondents by age groups and gender**

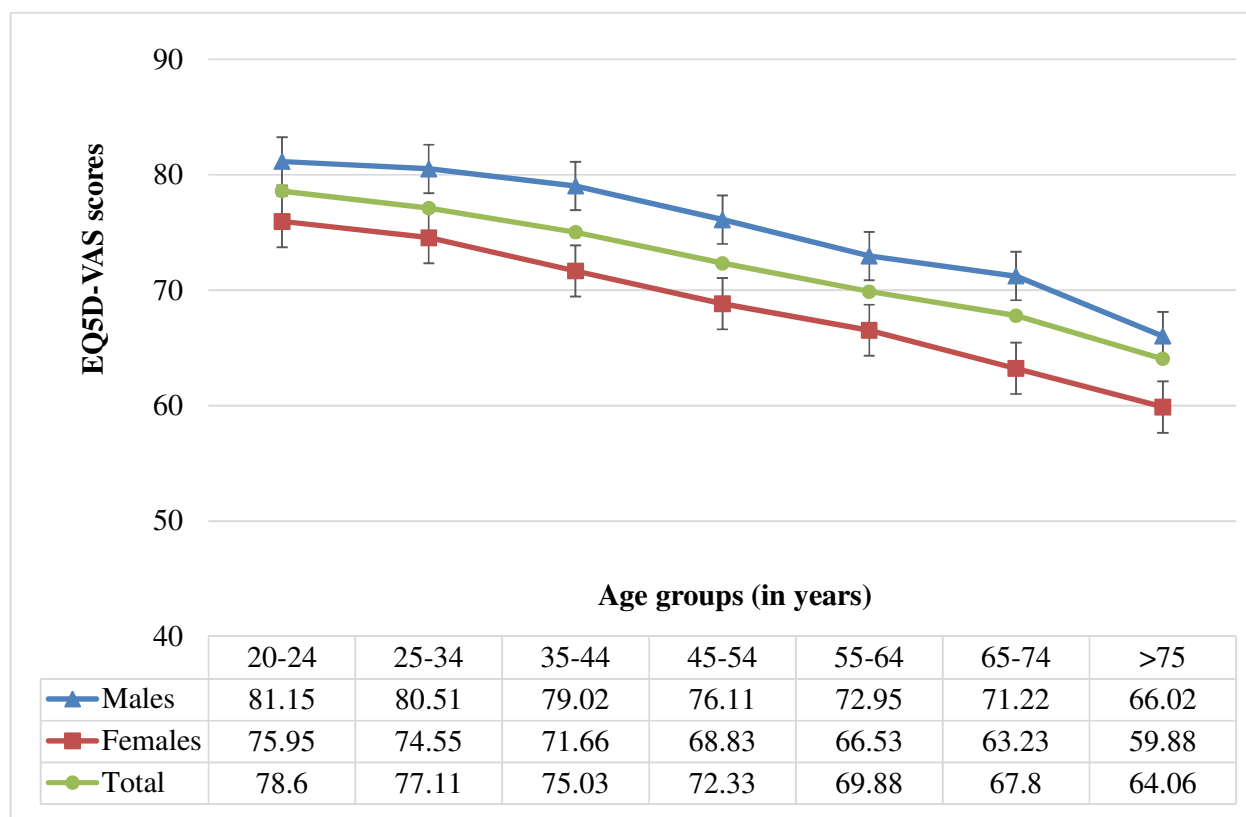

**Figure Legend:** This figure presents the mean self-rated health status for overall study population by age-groups and gender. European Quality of Life 5 Dimension - Visual Analogue Scale (EQ5D-VAS) measures health status on a scale of 0 (worst health status) – 100 (best imaginable health status)



**Figure 2 - Odds of moderate or severe health problems by socio-demographic factors and chronic conditions**

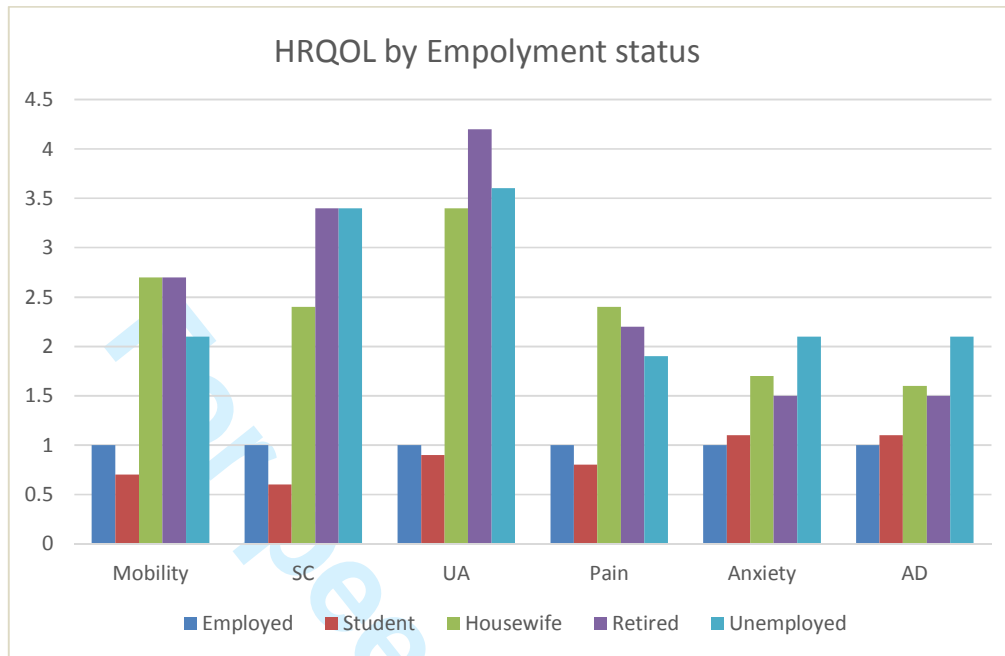

**SC – Self-Care, UA – Usual Activities, AD – Any Dimension**

Figure 2.a. shows the odds of moderate or severe difficulties in EQ5D domains (mobility, self-care, usual activities, pain/discomfort, anxiety/depression and any of the five dimensions) by employment status. With reference to those who were employed (OR=1), housewife, retired, and unemployed reported greater problems in all five domains. Whereas, students only reported higher anxiety problems compared to employed.

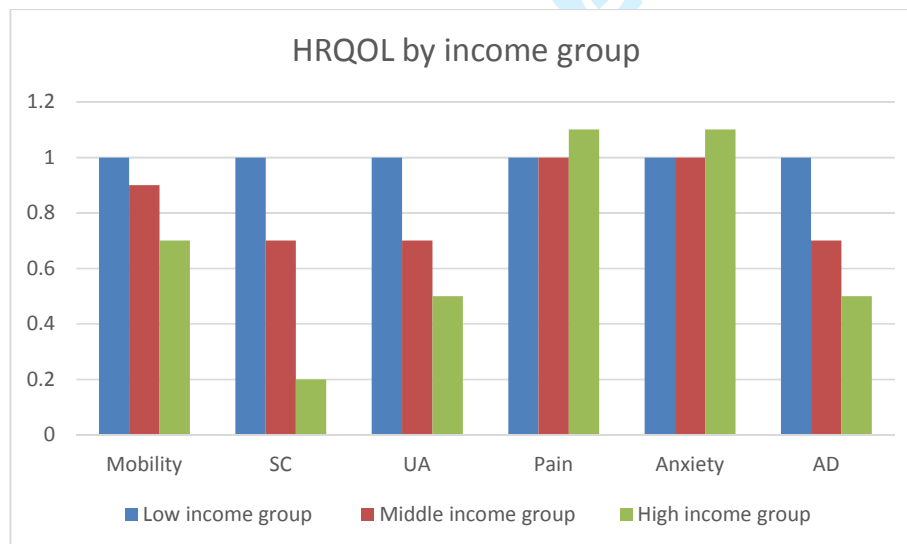

Figure 2.b. shows the odds of moderate or severe difficulties in EQ5D domains by income-group. With reference to low-income group (OR=1), those in middle- or high- income groups had less problems in all five domains.

1  
2  
3  
4  
5  
6  
7  
8  
9  
10  
11  
12  
13  
14  
15  
16  
17  
18  
19  
20  
21  
22  
23  
24  
25  
26  
27  
28  
29  
30  
31  
32  
33  
34  
35  
36  
37  
38  
39  
40  
41  
42  
43  
44  
45  
46  
47  
48  
49  
50  
51  
52  
53  
54  
55  
56  
57  
58  
59  
60

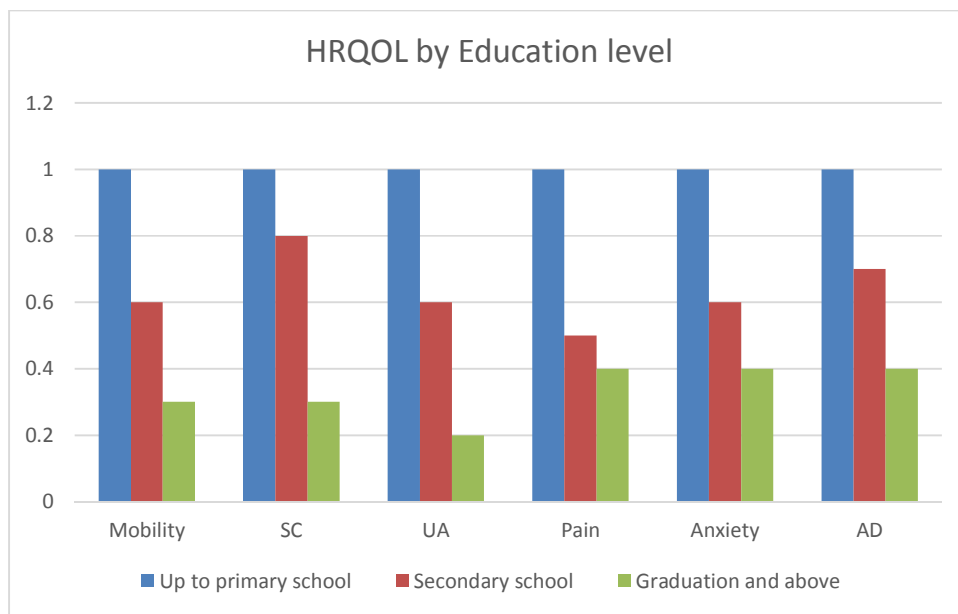

**Figure 2.c.** shows the odds of moderate or severe difficulties in EQ5D domains (mobility, self-care, usual activities, pain/discomfort, anxiety/depression and any of the five dimensions) by education level. With reference to those primary school education (OR=1), individuals with secondary school or graduates reported significantly lower problems in all five domains.

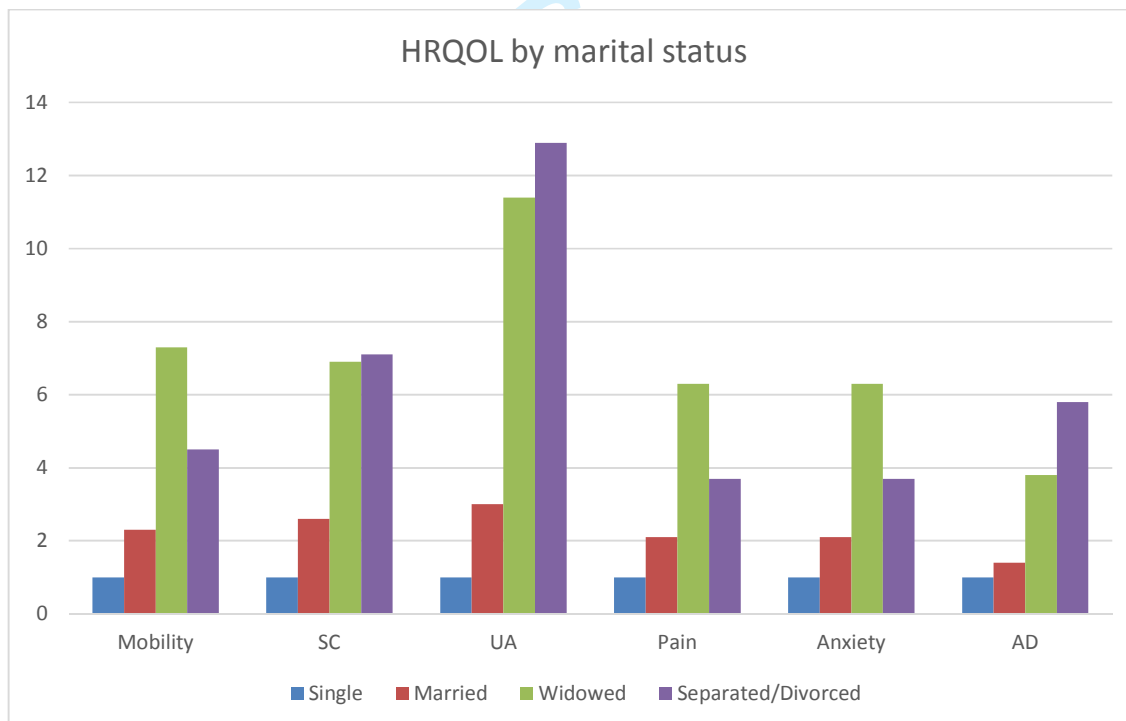

**Figure 2.d.** shows the odds of moderate or severe difficulties in EQ5D domains by marital status. With reference to single (OR=1), those who were married, widower, or divorcee had greater problems in all five domains.

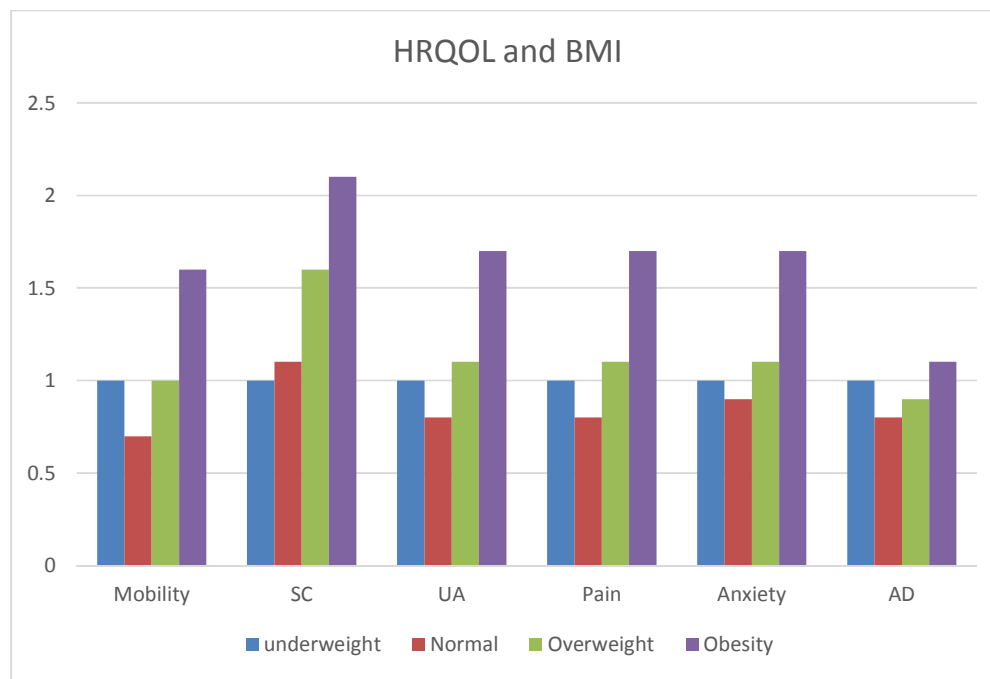

24  
25  
26  
27  
28  
29  
30  
31

**Figure 2.e.** shows the odds of moderate or severe difficulties in EQ5D domains (mobility, self-care, usual activities, pain/discomfort, anxiety/depression and any of the five dimensions) by body mass index (BMI). With reference to underweight i.e. BMI <math>18\text{Kg/m}^2</math> (OR=1), individuals with overweight (BMI >math>25\text{Kg/m}^2</math>) or obesity (BMI >math>30\text{Kg/m}^2</math>) reported significantly greater problems in all five domains.

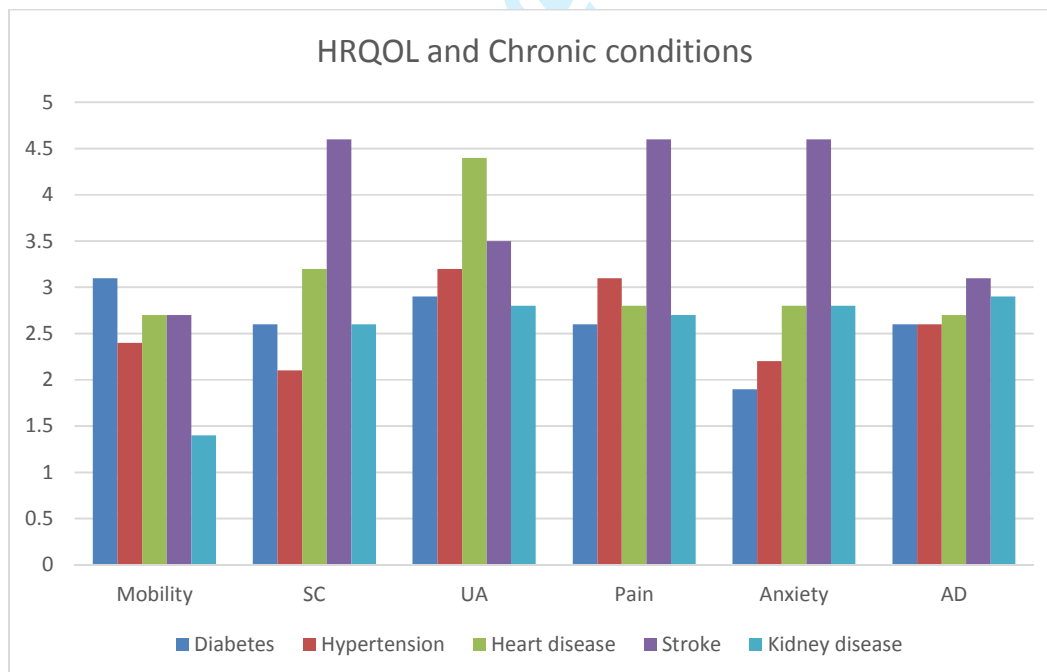

54  
55  
56  
57  
58  
59  
60

**Figure 2.f.** shows the odds of moderate or severe difficulties in EQ5D domains by chronic conditions. Compared to those without chronic conditions, individuals with self-reported diabetes, hypertension, heart disease, stroke and kidney disease had twice greater problems in all five domains.

1  
2 Abbreviations: AD – Any Dimension, HRQOL – Health-related quality of life, SC – Self-  
3 Care, UA – Usual Activities,  
4  
5  
6  
7  
8  
9  
10  
11  
12  
13  
14  
15  
16  
17  
18  
19  
20  
21  
22  
23  
24  
25  
26  
27  
28  
29  
30  
31  
32  
33  
34  
35  
36  
37  
38  
39  
40  
41  
42  
43  
44  
45  
46  
47  
48  
49  
50  
51  
52  
53  
54  
55  
56  
57  
58  
59  
60

For peer review only

Table 2 - Mean EQ-VAS and percentages of respondents reporting moderate or severe problems by various subgroups

|                                                       | No. of respondents | EQ-VAS Mean | 95%CI         | Mobility (%) | 95%CI       | Self-care (%) | 95%CI      | Usual activities (%) | 95%CI      | Pain/discomfort (%) | 95%CI       | Anxiety/depression (%) | 95%CI      |
|-------------------------------------------------------|--------------------|-------------|---------------|--------------|-------------|---------------|------------|----------------------|------------|---------------------|-------------|------------------------|------------|
| <b>Cities</b>                                         |                    |             |               |              |             |               |            |                      |            |                     |             |                        |            |
| <i>Chennai</i>                                        | 6906               | 70.79       | [70.10,71.49] | 17.3         | [15.4,19.4] | 7.8           | [6.5,9.2]  | 7.7                  | [6.6,9.0]  | 10.3                | [9.1,11.7]  | 11.4                   | [9.8,13.1] |
| <i>Delhi</i>                                          | 5364               | 78.88       | [77.89,79.88] | 14.1         | [11.9,16.7] | 1.6           | [1.2,2.1]  | 4.4                  | [3.4,5.7]  | 19.4                | [16.9,22.2] | 5.2                    | [4.0,6.6]  |
| <i>Karachi</i>                                        | 4017               | 73.23       | [72.63,73.82] | 10.4         | [9.4,11.5]  | 1.9           | [1.5,2.4]  | 5.6                  | [4.9,6.4]  | 12.9                | [11.8,14.2] | 7.2                    | [6.3,8.1]  |
| <b>Employment status</b>                              |                    |             |               |              |             |               |            |                      |            |                     |             |                        |            |
| Employed                                              | 7635               | 77.29       | [76.45,78.14] | 8.7          | [7.7,9.9]   | 2.4           | [1.8,3.1]  | 2.8                  | [2.3,3.4]  | 9.3                 | [8.3,10.4]  | 6.2                    | [5.4,7.1]  |
| Student                                               | 361                | 77.5        | [75.26,79.73] | 6.5          | [4.1,10.0]  | 1.5           | [0.7,3.4]  | 2.6                  | [1.3,4.9]  | 8.3                 | [5.4,12.7]  | 7.0                    | [4.4,10.8] |
| Homemakers                                            | 6781               | 71.62       | [70.75,72.49] | 20.9         | [18.9,22.9] | 5.7           | [4.8,6.8]  | 9.0                  | [7.8,10.4] | 19.7                | [17.6,22.0] | 9.9                    | [8.9,11.0] |
| Retired                                               | 765                | 71.66       | [69.98,73.34] | 21.0         | [17.7,24.6] | 7.7           | [5.7,10.3] | 11.0                 | [8.5,14.0] | 18.1                | [15.0,21.8] | 9.0                    | [7.0,11.5] |
| Unemployed                                            | 743                | 68.38       | [66.87,69.90] | 17.1         | [13.6,21.2] | 7.7           | [5.7,10.5] | 9.5                  | [7.3,12.4] | 16.1                | [13.2,19.6] | 12.3                   | [9.8,15.2] |
| <b>Income class</b>                                   |                    |             |               |              |             |               |            |                      |            |                     |             |                        |            |
| Low income group (INR <10000 or US\$ 155)             | 11537              | 73.44       | [72.73,74.14] | 15.2         | [13.9,16.7] | 4.8           | [4.1,5.7]  | 6.8                  | [6.0,7.6]  | 14                  | [12.7,15.4] | 9.2                    | [8.3,10.1] |
| Middle income group (INR 10000-20000 or US\$ 155-310) | 2667               | 75.87       | [74.81,76.94] | 14.6         | [12.6,16.8] | 3.5           | [2.6,4.7]  | 4.9                  | [3.9,6.1]  | 14.5                | [12.4,17.0] | 6.4                    | [5.3,7.6]  |
| High income group (INR >20000 or US\$ >310)           | 1975               | 77.17       | [75.95,78.39] | 11.0         | [8.8,13.8]  | 1.5           | [1.0,2.2]  | 3.4                  | [2.3,4.9]  | 15.5                | [12.8,18.6] | 5.0                    | [3.9,6.4]  |
| <b>Education status</b>                               |                    |             |               |              |             |               |            |                      |            |                     |             |                        |            |
| Up to primary school                                  | 3604               | 71.18       | [70.11,72.24] | 21.6         | [19.5,24.0] | 5.6           | [4.7,6.7]  | 9.8                  | [8.5,11.2] | 20.8                | [18.5,23.3] | 10.9                   | [9.6,12.4] |
| Secondary school                                      | 9924               | 74.34       | [73.56,75.13] | 14.0         | [12.6,15.5] | 4.5           | [3.7,5.3]  | 5.8                  | [5.1,6.7]  | 13.0                | [11.8,14.4] | 8.1                    | [7.3,9.0]  |
| Graduation and above                                  | 2759               | 77.94       | [76.99,78.88] | 8.3          | [6.7,10.2]  | 1.6           | [1.1,2.2]  | 2.3                  | [1.7,3.1]  | 10.8                | [9.0,12.8]  | 5.0                    | [4.1,6.0]  |
| <b>Marital Status</b>                                 |                    |             |               |              |             |               |            |                      |            |                     |             |                        |            |
| Single                                                | 1177               | 78.27       | [76.94,79.60] | 6.7          | [5.2,8.7]   | 1.6           | [0.9,2.9]  | 2.0                  | [1.2,3.2]  | 7.1                 | [5.5,9.2]   | 5.4                    | [3.9,7.5]  |
| Married                                               | 14217              | 74.36       | [73.67,75.05] | 14.2         | [13.0,15.6] | 4.1           | [3.5,4.8]  | 5.7                  | [5.0,6.5]  | 14                  | [12.6,15.4] | 7.8                    | [7.1,8.6]  |

|    |                                             |       |       |               |      |             |      |             |      |             |      |             |      |             |
|----|---------------------------------------------|-------|-------|---------------|------|-------------|------|-------------|------|-------------|------|-------------|------|-------------|
| 5  | Widowed                                     | 838   | 67.47 | [66.15,68.79] | 34.5 | [30.5,38.8] | 10.2 | [8.0,12.9]  | 18.7 | [15.8,22.1] | 32.7 | [29.3,36.2] | 18.2 | [15.4,21.3] |
| 6  | Separated/Divorced                          | 55    | 65.33 | [57.91,72.75] | 24.6 | [11.8,44.3] | 10.2 | [4.6,21.3]  | 20.6 | [8.8,41.0]  | 22.3 | [12.2,37.2] | 25.1 | [14.9,39.2] |
| 8  | <b>BMI (Kg/m<sup>2</sup>)</b>               |       |       |               |      |             |      |             |      |             |      |             |      |             |
| 9  | underweight (<18)                           | 756   | 74.03 | [72.30,75.77] | 14.9 | [11.7,18.8] | 3.0  | [1.7,5.3]   | 5.4  | [3.7,7.9]   | 12.9 | [10.1,16.5] | 9.0  | [6.3,12.7]  |
| 10 | Normal (18-25)                              | 5278  | 75.15 | [74.35,75.94] | 11.8 | [10.4,13.3] | 3.5  | [2.8,4.2]   | 4.8  | [4.0,5.7]   | 11.5 | [10.2,13.0] | 7.5  | [6.6,8.7]   |
| 11 | Overweight (25-30)                          | 4190  | 73.62 | [72.72,74.52] | 15.2 | [13.4,17.2] | 4.8  | [3.8,6.0]   | 6.2  | [5.2,7.3]   | 14.4 | [12.6,16.4] | 8.2  | [7.2,9.4]   |
| 12 | Obesity (>30)                               | 2249  | 70.4  | [69.57,71.22] | 22.3 | [19.9,24.9] | 6.4  | [5.1,8.0]   | 9.1  | [7.6,10.9]  | 20.7 | [18.2,23.6] | 10   | [8.5,11.8]  |
| 14 | <b>Tobacco use (Smoke/Chew/other forms)</b> |       |       |               |      |             |      |             |      |             |      |             |      |             |
| 15 | Never user                                  | 12215 | 74.12 | [73.44,74.80] | 15.4 | [14.0,16.8] | 4.5  | [3.8,5.3]   | 6.4  | [5.6,7.2]   | 14.6 | [13.1,16.2] | 8.1  | [7.3,9.0]   |
| 16 | Current user                                | 3758  | 75.33 | [74.33,76.32] | 11.8 | [10.4,13.4] | 3.1  | [2.4,4.1]   | 4.6  | [3.8,5.6]   | 12.9 | [11.6,14.5] | 7.9  | [6.7,9.2]   |
| 17 | Former user                                 | 314   | 70.15 | [67.00,73.29] | 17.6 | [13.4,22.8] | 4.7  | [2.7,8.1]   | 8.3  | [5.6,12.3]  | 18.1 | [13.6,23.7] | 12.4 | [8.8,17.2]  |
| 19 | <b>Chronic conditions (self-reported)</b>   |       |       |               |      |             |      |             |      |             |      |             |      |             |
| 20 | No                                          | 12498 | 76.21 | [75.49,76.93] | 11.9 | [10.7,13.1] | 3.5  | [2.8,4.2]   | 4.5  | [3.9,5.2]   | 11.2 | [10.1,12.5] | 6.8  | [6.0,7.6]   |
| 21 | Yes                                         | 4699  | 67.36 | [66.62,68.09] | 24.6 | [22.4,27.0] | 6.9  | [5.9,7.9]   | 11.8 | [10.5,13.2] | 25.5 | [23.3,27.9] | 13.2 | [12.0,14.5] |
| 22 | <b>Diabetes</b>                             |       |       |               |      |             |      |             |      |             |      |             |      |             |
| 23 | No diabetes                                 | 4610  | 75.17 | [74.41,75.92] | 10.1 | [8.9,11.4]  | 3.3  | [2.6,4.1]   | 4.2  | [3.5,5.0]   | 10.3 | [8.8,12.0]  | 7.5  | [6.5,8.6]   |
| 24 | Pre-diabetes                                | 5449  | 74.48 | [73.59,75.37] | 15.5 | [13.6,17.5] | 4.2  | [3.3,5.2]   | 6.0  | [5.0,7.2]   | 14.6 | [12.9,16.4] | 8.0  | [7.0,9.1]   |
| 25 | Newly diagnosed                             | 2015  | 74.35 | [73.39,75.30] | 17.2 | [14.7,20.1] | 5.0  | [3.8,6.5]   | 8.1  | [6.5,10.0]  | 17.2 | [15.0,19.6] | 8.5  | [7.1,10.1]  |
| 26 | Self-reported Diabetes                      | 1661  | 65.99 | [64.86,67.12] | 20.9 | [18.9,23.1] | 6.3  | [5.2,7.5]   | 9.5  | [8.3,11.0]  | 19.8 | [18.1,21.7] | 10.5 | [9.3,11.8]  |
| 28 | <b>Hypertension</b>                         |       |       |               |      |             |      |             |      |             |      |             |      |             |
| 29 | Normotension                                | 5695  | 74.82 | [74.06,75.57] | 12.8 | [11.4,14.3] | 3.8  | [3.0,4.9]   | 4.7  | [3.9,5.6]   | 11.6 | [9.9,13.6]  | 6.9  | [6.0,8.0]   |
| 30 | Prehypertension                             | 4717  | 76.02 | [75.09,76.95] | 12.7 | [11.2,14.4] | 3.7  | [2.9,4.6]   | 5.1  | [4.3,6.0]   | 12.3 | [11.0,13.8] | 6.5  | [5.6,7.5]   |
| 31 | Newly diagnosed                             | 2780  | 75.85 | [74.83,76.87] | 12.9 | [11.0,15.1] | 3.0  | [2.4,3.8]   | 5.1  | [4.2,6.3]   | 12.6 | [11.0,14.3] | 8.4  | [7.2,9.9]   |
| 32 | Self-reported                               | 2397  | 66.79 | [65.88,67.71] | 18.8 | [16.8,21.0] | 4.9  | [4.2,5.7]   | 8.7  | [7.6,9.9]   | 19.6 | [17.8,21.4] | 10.8 | [9.7,12.0]  |
| 34 | <b>Heart Disease</b>                        |       |       |               |      |             |      |             |      |             |      |             |      |             |
| 35 | No                                          | 15842 | 74.61 | [73.92,75.29] | 14.2 | [12.9,15.5] | 4.0  | [3.4,4.7]   | 5.6  | [5.0,6.4]   | 13.8 | [12.6,15.2] | 7.9  | [7.2,8.6]   |
| 36 | Yes                                         | 445   | 63.33 | [61.36,65.29] | 31.2 | [25.7,37.3] | 11.7 | [8.3,16.2]  | 20.8 | [16.7,25.7] | 31.4 | [26.5,36.7] | 19.0 | [15.0,23.8] |
| 38 | <b>Stroke</b>                               |       |       |               |      |             |      |             |      |             |      |             |      |             |
| 39 | No                                          | 16203 | 74.38 | [73.69,75.07] | 14.5 | [13.3,15.8] | 4.1  | [3.5,4.8]   | 6.0  | [5.3,6.7]   | 14.1 | [12.9,15.5] | 8.1  | [7.4,8.8]   |
| 40 | Yes                                         | 84    | 62.41 | [58.58,66.25] | 31.9 | [22.0,43.7] | 16.8 | [10.0,26.7] | 18.1 | [11.1,28.1] | 43.3 | [32.3,55.1] | 21.2 | [13.2,32.2] |

1  
2  
3  
4  
5  
6  
7  
8  
9  
10  
11  
12  
13  
14  
15  
16  
17  
18  
19  
20  
21  
22  
23  
24  
25  
26  
27  
28  
29  
30  
31  
32  
33  
34  
35  
36  
37  
38  
39  
40  
41  
42  
43  
44  
45  
46  
47  
48  
49

**Kidney disease**

|     |       |       |               |      |             |     |            |      |            |      |             |      |             |
|-----|-------|-------|---------------|------|-------------|-----|------------|------|------------|------|-------------|------|-------------|
| No  | 16175 | 74.41 | [73.72,75.09] | 14.6 | [13.3,15.9] | 4.1 | [3.6,4.8]  | 6.0  | [5.3,6.7]  | 14.1 | [12.9,15.5] | 8.1  | [7.3,8.8]   |
| Yes | 112   | 62.57 | [59.41,65.74] | 19.2 | [13.1,27.2] | 10  | [5.7,17.0] | 15.1 | [9.9,22.3] | 31.4 | [23.5,40.6] | 20.7 | [14.1,29.3] |

**NOTES:** Tobacco use, Heart disease, Kidney disease were based on self-reports, newly diagnosed diabetes - defined as no self-reported diabetes and fasting blood glucose (FBG) of  $\geq 126$  mg/dl, or HbA1c  $\geq 6.5\%$ , pre-diabetes – no self-reported diabetes and FBG  $\geq 100$ -125 mg/dl or HbA1c  $\geq 5.7$ -6.4%), normoglycemia –no self-reported diabetes and FBG $<100$  mg/dl and HbA1c $<5.7\%$ , Newly diagnosed hypertension – defined as no self-reported hypertension and BP  $\geq 140/90$ mmHg, prehypertension - no self-reported hypertension and BP: 120-139 / 80-89 mmHg and normotensive - no history of hypertension and BP  $<120/80$  mmHg.

Abbreviations: INR: Indian rupees, mmHg – millimetre of mercury, mg/dl - Milligram/decilitre; US\$ - United States Dollar

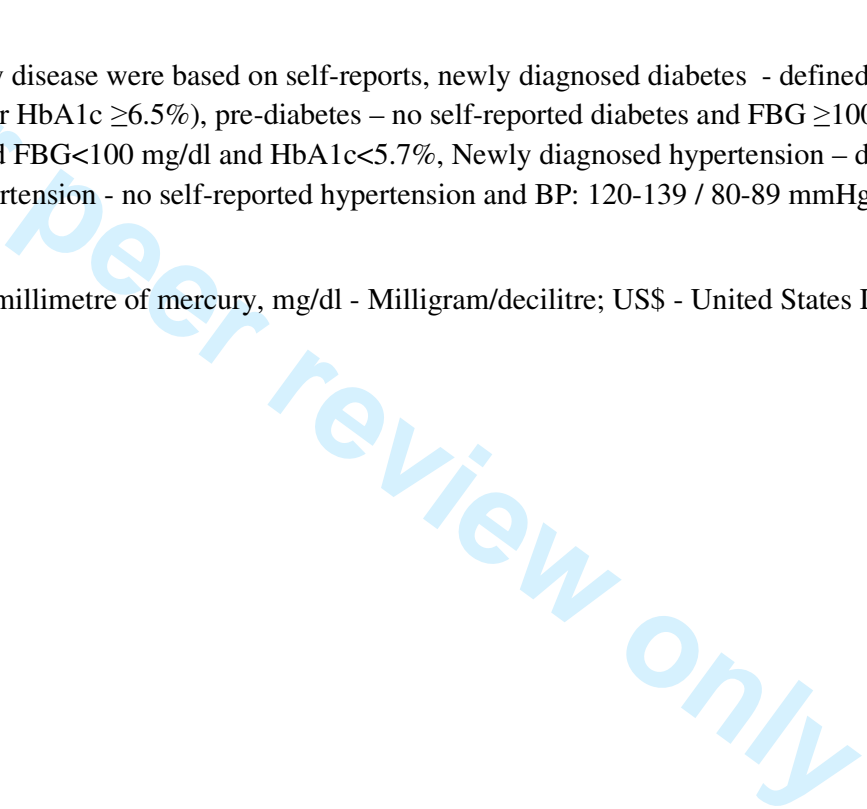

**Table 3: Adjusted Odds ratio of reporting any problems in individuals with chronic conditions versus those without chronic conditions, by cities and gender**

|                | Mobility |             | Self-care |              | Usual activities |             | Pain/discomfort |             | Anxiety/depression |             |
|----------------|----------|-------------|-----------|--------------|------------------|-------------|-----------------|-------------|--------------------|-------------|
|                | OR       | 95% CI      | OR        | 95% CI       | OR               | 95% CI      | OR              | 95% CI      | OR                 | 95% CI      |
| <b>Overall</b> | 1.6      | [1.38,1.85] | 1.4       | [1.11,1.78]  | 1.8              | [1.55,2.22] | 2.1             | [1.82,2.33] | 1.7                | [1.47,2.02] |
| Males          | 2.1      | [1.56,2.56] | 1.6       | [1.11,2.48]  | 2.1              | [1.45,3.14] | 2.1             | [1.74,2.55] | 2.2                | [1.63,2.94] |
| Females        | 1.4      | [1.23,1.76] | 1.3       | [1.00,1.79]  | 1.8              | [1.48,2.21] | 2.1             | [1.78,2.47] | 1.5                | [1.28,1.84] |
| <b>Chennai</b> | 1.3      | [1.07,1.72] | 1.1       | [0.82,1.48]  | 1.3              | [1.09,1.74] | 2.6             | [1.79,3.96] | 1.7                | [1.38,2.08] |
| Males          | 1.6      | [1.08,2.33] | 1.1       | [0.69,1.85]  | 1.2              | [0.78,2.01] | 1.9             | [1.38,2.51] | 1.9                | [1.40,2.59] |
| Females        | 1.3      | [0.95,1.72] | 1.1       | [0.75,1.58]  | 1.5              | [1.13,1.93] | 1.9             | [1.49,2.56] | 1.6                | [1.20,2.09] |
| <b>Delhi</b>   | 2.1      | [1.60,2.50] | 1.9       | [1.4, 2.5]   | 2.6              | [1.79,3.96] | 2.3             | [1.68,3.09] | 1.9                | [1.32,2.89] |
| Males          | 2.5      | [1.69,3.77] | 5.4       | [1.99,14.82] | 4.1              | [1.75,9.64] | 2.2             | [1.63,3.01] | 3.6                | [1.36,9.78] |
| Females        | 1.9      | [1.44,2.46] | 2.3       | [1.29,4.16]  | 2.4              | [1.54,3.62] | 2.5             | [1.84,3.35] | 1.6                | [1.13,2.39] |
| <b>Karachi</b> | 1.5      | [1.20,1.95] | 1.8       | [1.05,3.10]  | 2.3              | [1.68,3.09] | 1.9             | [1.56,2.34] | 1.7                | [1.24,2.29] |
| Males          | 2.7      | [1.56,4.86] | 1.8       | [0.74,4.36]  | 3.1              | [1.66,5.97] | 2.6             | [1.60,4.14] | 2.2                | [1.30,3.73] |
| Females        | 1.3      | [1.01,1.69] | 2.2       | [1.11,4.24]  | 2.1              | [1.51,2.98] | 1.7             | [1.32,2.15] | 1.4                | [0.93,2.02] |

**NOTES:** \*Logistic regression model was adjusted for age, sex, income, education, marital status

Abbreviations: CI – confidence interval, OR – odds ratio



## References

1. Rabin R, de Charro F. EQ-5D: a measure of health status from the EuroQol Group. *Ann Med*. 2001;33(5):337-43.
2. Todorich BM, Connor JR. Redox metals in Alzheimer's disease. *Ann N Y Acad Sci*. 2004;1012:171-8.
3. Kaplan RM, Anderson JP. A general health policy model: update and applications. *Health Serv Res*. 1988;23(2):203-35.
4. Coons SJ, Rao S, Keininger DL, Hays RD. A comparative review of generic quality-of-life instruments. *Pharmacoeconomics*. 2000;17(1):13-35.
5. Prabhakaran D, Jeemon P, Roy A. Cardiovascular Diseases in India: Current Epidemiology and Future Directions. *Circulation*. 2016;133(16):1605-20.
6. Fortin M, Lapointe L, Hudon C, Vanasse A, Ntetu AL, Maltais D. Multimorbidity and quality of life in primary care: a systematic review. *Health Qual Life Outcomes*. 2004;2:51.
7. Alonso J, Ferrer M, Gandek B, Ware JE, Jr., Aaronson NK, Mosconi P, et al. Health-related quality of life associated with chronic conditions in eight countries: results from the International Quality of Life Assessment (IQOLA) Project. *Qual Life Res*. 2004;13(2):283-98.
8. Schultz SE, Kopec JA. Impact of chronic conditions. *Health Rep*. 2003;14(4):41-53.
9. Patrick DL, Deyo RA. Generic and disease-specific measures in assessing health status and quality of life. *Med Care*. 1989;27(3 Suppl):S217-32.
10. Horsman J, Furlong W, Feeny D, Torrance G. The Health Utilities Index (HUI): concepts, measurement properties and applications. *Health Qual Life Outcomes*. 2003;1:54.
11. Furlong WJ, Feeny DH, Torrance GW, Barr RD. The Health Utilities Index (HUI) system for assessing health-related quality of life in clinical studies. *Ann Med*. 2001;33(5):375-84.
12. Brazier J, Roberts J, Deverill M. The estimation of a preference-based measure of health from the SF-36. *J Health Econ*. 2002;21(2):271-92.
13. McHorney CA. Health status assessment methods for adults: past accomplishments and future challenges. *Annu Rev Public Health*. 1999;20:309-35.
14. The World Health Organization Quality of Life Assessment (WHOQOL): development and general psychometric properties. *Soc Sci Med*. 1998;46(12):1569-85.
15. The World Health Organization Quality of Life assessment (WHOQOL): position paper from the World Health Organization. *Soc Sci Med*. 1995;41(10):1403-9.
16. Study protocol for the World Health Organization project to develop a Quality of Life assessment instrument (WHOQOL). *Qual Life Res*. 1993;2(2):153-9.
17. Centers for Disease Control and Prevention. Measuring healthy days: Population assessment of health-related quality of life. Centers for Disease Control and Prevention, Atlanta, Georgia 2000.
18. Gandek B, Sinclair SJ, Kosinski M, Ware JE, Jr. Psychometric evaluation of the SF-36 health survey in Medicare managed care. *Health Care Financ Rev*. 2004;25(4):5-25.
19. Nair M, Ali MK, Ajay VS, Shivashankar R, Mohan V, Pradeepa R, et al. CARRS Surveillance study: design and methods to assess burdens from multiple perspectives. *BMC Public Health*. 2012;12:701.
20. Pandit N, Dahiya R, Gupta R, Bali D, Kathuria A. Comparative evaluation of locally delivered minocycline and metronidazole in the treatment of periodontitis. *Contemp Clin Dent*. 2013;4(1):48-53.
21. Patel SA, Shivashankar R, Ali MK, Anjana RM, Deepa M, Kapoor D, et al. Is the "South Asian Phenotype" Unique to South Asians?: Comparing Cardiometabolic Risk Factors in the CARRS and NHANES Studies. *Glob Heart*. 2016;11(1):89-96 e3.
22. Deepa M, Grace M, Binukumar B, Pradeepa R, Roopa S, Khan HM, et al. High burden of prediabetes and diabetes in three large cities in South Asia: The Center for Cardio-metabolic Risk Reduction in South Asia (CARRS) Study. *Diabetes Res Clin Pract*. 2015;110(2):172-82.

23. Berg CJ, Ajay VS, Ali MK, Kondal D, Khan HM, Shivashankar R, et al. A cross-sectional study of the prevalence and correlates of tobacco use in Chennai, Delhi, and Karachi: data from the CARRS study. *BMC Public Health*. 2015;15:483.
24. Ali MK, Bhaskarapillai B, Shivashankar R, Mohan D, Fatmi ZA, Pradeepa R, et al. Socioeconomic status and cardiovascular risk in urban South Asia: The CARRS Study. *Eur J Prev Cardiol*. 2016;23(4):408-19.
25. Kind P, Dolan P, Gudex C, Williams A. Variations in population health status: results from a United Kingdom national questionnaire survey. *BMJ*. 1998;316(7133):736-41.
26. Sun H, Zhang Q, Luo X, Quan H, Zhang F, Liu C, et al. Changes of adult population health status in China from 2003 to 2008. *PLoS One*. 2011;6(12):e28411.
27. Sun S, Chen J, Johannesson M, Kind P, Xu L, Zhang Y, et al. Regional differences in health status in China: population health-related quality of life results from the National Health Services Survey 2008. *Health Place*. 2011;17(2):671-80.
28. Sun S, Chen J, Johannesson M, Kind P, Xu L, Zhang Y, et al. Population health status in China: EQ-5D results, by age, sex and socio-economic status, from the National Health Services Survey 2008. *Qual Life Res*. 2011;20(3):309-20.
29. Measuring Self-Reported Population Health: An International Perspective based on EQ-5D. In: Szende A, Williams, A., ed. On behalf of: The EuroQol Group's International Task Force on Self-Reported Health; 2004.
30. Sayed BA, French MT. To your health!: Re-examining the health benefits of moderate alcohol use. *Soc Sci Med*. 2016;167:20-8.
31. Mauro PM, Canham SL, Martins SS, Spira AP. Substance-use coping and self-rated health among US middle-aged and older adults. *Addict Behav*. 2015;42:96-100.
32. Kindig DA, Remington PL. Mobilizing Action Toward Community Health (MATCH): metrics, incentives, and partnerships for population health. *Prev Chronic Dis*. 2010;7(5).
33. Hennessy CH, Moriarty DG, Zack MM, Scherr PA, Brackbill R. Measuring health-related quality of life for public health surveillance. *Public Health Rep*. 1994;109(5):665-72.
34. Dominick KL, Ahern FM, Gold CH, Heller DA. Relationship of health-related quality of life to health care utilization and mortality among older adults. *Aging Clin Exp Res*. 2002;14(6):499-508.
35. Prazeres F, Santiago L. Relationship between health-related quality of life, perceived family support and unmet health needs in adult patients with multimorbidity attending primary care in Portugal: a multicentre cross-sectional study. *Health Qual Life Outcomes*. 2016;14(1):156.
36. Polat U, Bayrak Kahraman B, Kaynak I, Gorgulu U. Relationship among health-related quality of life, depression and awareness of home care services in elderly patients. *Geriatr Gerontol Int*. 2016;16(11):1211-9.
37. Lim JW, Paek MS. The relationship between communication and health-related quality of life in survivorship care for Chinese-American and Korean-American breast cancer survivors. *Support Care Cancer*. 2013;21(4):1157-66.
38. Badia X, Herdman M, Kind P. The influence of ill-health experience on the valuation of health. *Pharmacoeconomics*. 1998;13(6):687-96.
39. Sullivan PW, Ghushchyan V. Preference-Based EQ-5D index scores for chronic conditions in the United States. *Med Decis Making*. 2006;26(4):410-20.
40. Ko Y, Coons SJ. Self-reported chronic conditions and EQ-5D index scores in the US adult population. *Curr Med Res Opin*. 2006;22(10):2065-71.
41. Sakthong P, Sonsa-Ardjit N, Sukarnjanaset P, Munpan W. Psychometric properties of the EQ-5D-5L in Thai patients with chronic diseases. *Qual Life Res*. 2015;24(12):3015-22.
42. Tan Z, Liang Y, Liu S, Cao W, Tu H, Guo L, et al. Health-related quality of life as measured with EQ-5D among populations with and without specific chronic conditions: a population-based survey in Shaanxi Province, China. *PLoS One*. 2013;8(7):e65958.
43. McPherson K, Myers J, Taylor WJ, McNaughton HK, Weatherall M. Self-valuation and societal valuations of health state differ with disease severity in chronic and disabling conditions. *Med Care*. 2004;42(11):1143-51.

- 1
  - 2
  - 3
  - 4
  - 5
  - 6
  - 7
  - 8
  - 9
  - 10
  - 11
  - 12
  - 13
  - 14
  - 15
  - 16
  - 17
  - 18
  - 19
  - 20
  - 21
  - 22
  - 23
  - 24
  - 25
  - 26
  - 27
  - 28
  - 29
  - 30
  - 31
  - 32
  - 33
  - 34
  - 35
  - 36
  - 37
  - 38
  - 39
  - 40
  - 41
  - 42
  - 43
  - 44
  - 45
  - 46
  - 47
  - 48
  - 49
  - 50
  - 51
  - 52
  - 53
  - 54
  - 55
  - 56
  - 57
  - 58
  - 59
  - 60
44. Lam JM, Wodchis WP. The relationship of 60 disease diagnoses and 15 conditions to preference-based health-related quality of life in Ontario hospital-based long-term care residents. *Med Care*. 2010;48(4):380-7.
45. Hutchinson AF, Graco M, Rasekaba TM, Parikh S, Berlowitz DJ, Lim WK. Relationship between health-related quality of life, comorbidities and acute health care utilisation, in adults with chronic conditions. *Health Qual Life Outcomes*. 2015;13:69.
46. Hevey D, McGee HM, Horgan J. Relationship of initial level of distress to changes in health-related quality of life during cardiac rehabilitation or usual care. *Psychosom Med*. 2007;69(8):793-7.
47. Arnlinde MH, Nokela M, Rehnberg C, Jonsson EW. The relationship between pharmaceutical costs, disease severity, and health-related quality of life in asthmatics in Swedish primary care. *J Asthma*. 2006;43(8):585-91.
48. Mo F, Choi BC, Li FC, Merrick J. Using Health Utility Index (HUI) for measuring the impact on health-related quality of Life (HRQL) among individuals with chronic diseases. *ScientificWorldJournal*. 2004;4:746-57.
49. Lubetkin EI, Jia H, Franks P, Gold MR. Relationship among sociodemographic factors, clinical conditions, and health-related quality of life: examining the EQ-5D in the U.S. general population. *Qual Life Res*. 2005;14(10):2187-96.
50. Jia H, Lubetkin EI. The impact of obesity on health-related quality-of-life in the general adult US population. *J Public Health (Oxf)*. 2005;27(2):156-64.
51. Chen J, Wong, C.K.H., McGhee, S.M., Pang, P.K.P., Yu, W.C. A Comparison between the EQ-5D and the SF-6D in Patients with Chronic Obstructive Pulmonary Disease (COPD). *PLoS One*. 2014;9(11).
52. Salaffi F, Carotti M, Ciapetti A, Gasparini S, Grassi W. A comparison of utility measurement using EQ-5D and SF-6D preference-based generic instruments in patients with rheumatoid arthritis. *Clin Exp Rheumatol*. 2011;29(4):661-71.
53. Wu J, Han Y, Zhao FL, Zhou J, Chen Z, Sun H. Validation and comparison of EuroQoL-5 dimension (EQ-5D) and Short Form-6 dimension (SF-6D) among stable angina patients. *Health Qual Life Outcomes*. 2014;12:156.
54. Petrou S, Hockley C. An investigation into the empirical validity of the EQ-5D and SF-6D based on hypothetical preferences in a general population. *Health Econ*. 2005;14(11):1169-89.
55. Obradovic M, Lal A, Liedgens H. Validity and responsiveness of EuroQol-5 dimension (EQ-5D) versus Short Form-6 dimension (SF-6D) questionnaire in chronic pain. *Health Qual Life Outcomes*. 2013;11:110.
56. Kuspinar A, Mayo NE. A review of the psychometric properties of generic utility measures in multiple sclerosis. *Pharmacoeconomics*. 2014;32(8):759-73.
57. Wu SC, Li CY, Ke DS. The agreement between self-reporting and clinical diagnosis for selected medical conditions among the elderly in Taiwan. *Public Health*. 2000;114(2):137-42.
58. Molenaar EA, Van Ameijden EJ, Grobbee DE, Numans ME. Comparison of routine care self-reported and biometrical data on hypertension and diabetes: results of the Utrecht Health Project. *Eur J Public Health*. 2007;17(2):199-205.
59. Robinson JR, Young TK, Roos LL, Gelskey DE. Estimating the burden of disease. Comparing administrative data and self-reports. *Med Care*. 1997;35(9):932-47.
60. Okura Y, Urban LH, Mahoney DW, Jacobsen SJ, Rodeheffer RJ. Agreement between self-report questionnaires and medical record data was substantial for diabetes, hypertension, myocardial infarction and stroke but not for heart failure. *J Clin Epidemiol*. 2004;57(10):1096-103.

## Web-appendix (supplementary file)

### Appendix 1: The distribution of the respondents EQ-VAS values

| EQ-VAS score | Number | Percentage (%) | Cum. Percentage (%) |
|--------------|--------|----------------|---------------------|
| 10-          | 29     | 0.18           | 0.18                |
| 20-          | 72     | 0.44           | 0.62                |
| 30-          | 88     | 0.54           | 1.16                |
| 40-          | 365    | 2.24           | 3.4                 |
| 50-          | 2,056  | 12.62          | 16.03               |
| 60-          | 1,979  | 12.15          | 28.18               |
| 70-          | 3,728  | 22.89          | 51.07               |
| 80-          | 4,026  | 24.72          | 75.78               |
| 90-          | 2,594  | 15.93          | 91.71               |
| 100-         | 1,350  | 8.29           | 100                 |

**Notes:** EQ-VAS: European Quality of Life – Visual Analogue Scale, Cum. Percentage –

Cumulative percentage

## Appendix 2: Relationship between EQ-VAS and EQ5D across major sub-groups

| Dependent variable                                           | Mobility    | Self-care   | Usual care  | Pain / discomfort | Anxiety / Depression | Observation |
|--------------------------------------------------------------|-------------|-------------|-------------|-------------------|----------------------|-------------|
| Overall                                                      | -10.5 (0.6) | -9.9 (0.9)  | -12.4 (0.7) | -10.9 (0.6)       | -8.9 (0.8)           | 16287       |
| Gender                                                       |             |             |             |                   |                      |             |
| <b>Male</b>                                                  | -12.0 (0.6) | -11.4 (1.1) | -14.6 (0.9) | -11.9 (0.6)       | -12.1 (0.7)          | 7760        |
| <b>Female</b>                                                | -8.1 (0.4)  | -7.9 (0.7)  | -9.9 (0.6)  | -7.7 (0.4)        | -9.1 (0.5)           | 8527        |
| Age groups                                                   |             |             |             |                   |                      |             |
| <b>Young (20-44 yrs)</b>                                     | -9.9 (0.5)  | -11.0 (0.9) | -12.0 (0.8) | -8.8 (0.5)        | -9.3 (0.6)           | 9603        |
| <b>Middle (45-60 yrs)</b>                                    | -9.0 (0.5)  | -10.8 (0.9) | -11.3 (0.8) | -9.0 (0.5)        | -10.7 (0.6)          | 5544        |
| <b>Elderly (&gt;60 yrs)</b>                                  | -11.1 (1.0) | -11.7 (1.6) | -13.1 (1.3) | -11.0 (1.1)       | -13.2 (1.4)          | 1140        |
| Income                                                       |             |             |             |                   |                      |             |
| <b>Low income group (INR &lt;10000 or US\$ 155)</b>          | -10.6 (0.4) | -12.1 (0.7) | -13.2 (0.6) | -10.2 (0.4)       | -10.7 (0.5)          | 11537       |
| <b>Middle income group (INR 10000-20000 or US\$ 155-310)</b> | -10.2 (0.8) | -8.9 (1.6)  | -10.7 (1.3) | -9.2 (0.8)        | -11.8 (1.1)          | 2667        |
| <b>High income group (INR &gt;20000 or US\$ &gt;310)</b>     | -12 (1.0)   | -14.4(2.5)  | -15.6 (1.7) | -10.5 (0.9)       | -8.2 (1.6)           | 1975        |
| Level of education                                           |             |             |             |                   |                      |             |
| <b>Up to primary school</b>                                  | -10.8 (0.6) | -12.8 (1.1) | -12.6 (0.8) | -9.9 (0.6)        | -11.6 (0.8)          | 3604        |
| <b>Secondary school</b>                                      | -9.9 (0.4)  | -11.1 (0.8) | -12.2 (0.7) | -9.3 (0.4)        | -10.2 (0.5)          | 9924        |
| <b>Graduation and above</b>                                  | -8.9 (1.0)  | -8.3 (2.1)  | -11.4 (1.8) | -9.8 (0.9)        | -8.3 (1.3)           | 2759        |
| Marital status                                               |             |             |             |                   |                      |             |
| <b>Single</b>                                                | -8.4 (1.9)  | -9.4 (3.8)  | -15.2 (3.3) | -9.0 (1.8)        | -10.8 (2.0)          | 1177        |
| <b>Married</b>                                               | -10.3 (0.4) | -11.5 (0.6) | -12.3 (0.5) | -9.5 (0.4)        | -10.3 (0.5)          | 14217       |
| <b>Widowed</b>                                               | -9.9 (1.2)  | -11.1 (1.8) | -12.9 (1.4) | -10.1 (1.2)       | -11.8 (1.5)          | 838         |
| <b>Divorce</b>                                               | -18.6 (5.8) | -14.1 (7.0) | -24.2 (6.0) | -15.1 (5.6)       | -15.6 (5.1)          | 55          |
| Tobacco use                                                  |             |             |             |                   |                      |             |
| <b>No</b>                                                    | -10.1 (0.4) | -11.4 (0.6) | -12.4 (0.5) | -9.8 (0.4)        | -10.5 (0.5)          | 12529       |
| <b>Yes</b>                                                   | -13.4 (0.8) | -15.5 (1.5) | -16.5 (1.2) | -11.1 (0.7)       | -12.6 (0.9)          | 3758        |
| Alcohol use                                                  |             |             |             |                   |                      |             |
| <b>No</b>                                                    | -10.6 (0.4) | -12.1 (0.6) | -13.1 (0.5) | -10.2 (0.4)       | -11.0 (0.5)          | 13911       |
| <b>Yes</b>                                                   | -10.6 (1.1) | -10.7 (2.0) | -11.4 (1.9) | -8.2 (1.0)        | -10.6 (1.2)          | 2376        |
| BMI                                                          |             |             |             |                   |                      |             |
| <b>Underweight</b>                                           | -10.6 (2.4) | -15.6 (5.1) | -15.4 (3.9) | -10.5 (2.9)       | -7.8 (4.8)           | 756         |
| <b>Normal weight</b>                                         | -10.6 (0.9) | -11.6(1.5)  | -13.6 (1.2) | -9.2 (0.9)        | -9.7 (1.2)           | 5278        |
| <b>Overweight</b>                                            | -10.3 (1.1) | -12.1 (1.2) | -11.6 (1.3) | -7.7 (0.9))       | -8.9 (1.2)           | 4190        |
| <b>Obesity</b>                                               | -7.4 (0.9)  | -9.9 (1.7)  | -11.4 (1.3) | -8.0 (0.9)        | -8.6 (1.4)           | 2249        |
| Diabetes                                                     |             |             |             |                   |                      |             |
| <b>Diabetes (diagnosed or self-reported)</b>                 | -10.0 (0.6) | -11.6 (1.1) | -11.6 (0.9) | -9.7 (0.6)        | -11.4 (0.8)          | 3676        |
| <b>Pre diabetes</b>                                          | -10.2 (0.6) | -13.5 (1.0) | -14.1 (0.8) | -9.4 (0.6)        | -10.6 (0.7)          | 5449        |
| <b>No diabetes</b>                                           | -10.9 (0.7) | -11.0 (1.2) | -12.6 (1.1) | -9.9 (0.7)        | -10.0 (0.8)          | 4610        |
| Hypertension                                                 |             |             |             |                   |                      |             |

|                                                |             |             |             |             |             |       |
|------------------------------------------------|-------------|-------------|-------------|-------------|-------------|-------|
| <b>Diagnosed or Self-reported hypertension</b> | -11.2 (0.6) | -14.7 (1.0) | -14.1 (0.8) | -10.8 (0.6) | -10.8 (0.7) | 5074  |
| <b>Pre hypertension</b>                        | -10.9 (0.7) | -12.4 (1.2) | -14.1 (1.0) | -9.7 (0.7)  | -11.2 (0.9) | 4717  |
| <b>No hypertension</b>                         | -9.3 (0.6)  | -9.6 (1.0)  | -10.4 (0.9) | -8.4 (0.6)  | -10.0 (0.7) | 5695  |
| Heart disease                                  |             |             |             |             |             |       |
| <b>No</b>                                      | -10.5 (0.3) | -11.9 (0.6) | -13.0 (0.5) | -9.9 (0.3)  | -10.7 (0.4) | 15842 |
| <b>Yes</b>                                     | -9.0 (1.6)  | -9.0 (2.5)  | -9.5 (1.9)  | -7.4 (1.7)  | -11.8 (2.0) | 445   |
| Stroke                                         |             |             |             |             |             |       |
| <b>No</b>                                      | -10.7 (0.3) | -11.9 (0.6) | -13.1 (0.5) | -10.0 (0.3) | -10.8 (0.4) | 16203 |
| <b>Yes</b>                                     | -13.7 (3.6) | -18.4 (4.4) | -19.2 (4.1) | -12.2 (3.5) | -16.3 (4.1) | 84    |
| Kidney disease                                 |             |             |             |             |             |       |
| <b>No</b>                                      | -10.7 (0.3) | -11.9 (0.6) | -13.1 (0.5) | -9.9 (0.3)  | -10.8 (0.4) | 16175 |
| <b>Yes</b>                                     | -11.6 (3.7) | -21.2 (4.8) | -14.3 (4.2) | -16.4 (3.2) | -16.3 (3.7) | 112   |

**NOTES:** Tobacco use, Heart disease, Kidney disease were based on self-reports, newly diagnosed diabetes - defined as no self-reported diabetes and fasting blood glucose (FBG) of  $\geq 126$  mg/dl, or HbA1c  $\geq 6.5\%$ ), pre-diabetes – no self-reported diabetes and FBG  $\geq 100$ -125 mg/dl or HbA1c  $\geq 5.7$ -6.4%), normoglycemia – no self-reported diabetes and FBG  $< 100$  mg/dl and HbA1c  $< 5.7\%$ , Newly diagnosed hypertension – defined as no self-reported hypertension and BP  $\geq 140/90$  mmHg, prehypertension - no self-reported hypertension and BP: 120-139 / 80-89 mmHg and normotensive - no history of hypertension and BP  $< 120/80$  mmHg. INR: Indian rupees, mmHg – millimeter of mercury, mg/dl - Milligram/deciliter; yrs – years; US\$ - United States Dollar

## Appendix 3 - The comparison of HRQOL as measured by EQ5D-VAS among different countries

| Countries, year of study                  | N      | EQ-VAS | Percentages with any difficulties in EQ5D domain |           |                  |                   |                      |               |
|-------------------------------------------|--------|--------|--------------------------------------------------|-----------|------------------|-------------------|----------------------|---------------|
|                                           |        |        | Mobility                                         | Self-care | Usual activities | Pain / Discomfort | Anxiety / Depression | Any dimension |
| India, Delhi (age $\geq$ 20), 2011        | 5,365  | 78.9   | 14.1                                             | 1.6       | 4.4              | 8.0               | 9.5                  | 27.8          |
| India, Chennai, (age $\geq$ 20), 2011     | 6,903  | 70.8   | 17.3                                             | 7.8       | 7.7              | 9.0               | 8.9                  | 29.7          |
| Pakistan (Karachi), (age $\geq$ 20), 2011 | 4,016  | 73.2   | 10.4                                             | 1.9       | 5.6              | 8.7               | 9.3                  | 17.9          |
| China (age $\geq$ 18), 2008               | 2,991  | 77.0   | 4.9                                              | 2.0       | 3.3              | 18.0              | 6.1                  | 22.4          |
| UK (age $\geq$ 18), 1998                  | 3395   | 82.5   | 18.4                                             | 4.2       | 16.3             | 33.0              | 20.9                 | 43.1          |
| USA (age $\geq$ 18) , 1998                | 427    | 82.2   | 14.0                                             | 3.0       | 14.0             | 40.0              | 24.0                 | na            |
| Japan (age $\geq$ 20) , 1998              | 620    | 77.8   | 7.2                                              | 1.8       | 5.2              | 20.0              | 8.5                  | 25.0          |
| Spain (age $\geq$ 15) , 1998              | 12,245 | 71.1   | 11.2                                             | 2.0       | 6.9              | 26.3              | 12.5                 | 33.0          |
| Canada (age $\geq$ 18), 1997              | 1518   | 78.7   | 22.2                                             | 4.0       | 19.1             | 43.6              | 28.6                 | 53.0          |
| Sweden (age $\geq$ 18), 1998              | 3069   | 83.5   | 10.0                                             | 2.0       | 8.0              | 42.0              | 30.0                 | na            |
| Finland (age $\geq$ 18), 1992             | 2411   | 79.4   | 20.0                                             | 5.0       | 18.0             | 39.0              | 14.0                 | na            |
| Germany (age $\geq$ 18), 1998             | 337    | 82.2   | 18.0                                             | 3.0       | 13.0             | 37.0              | 18.0                 | na            |
| Belgium (age $\geq$ 18), 2001             | 1274   | 81.0   | 13.0                                             | 3.0       | 15.0             | 42.0              | 21.0                 | na            |
| New Zealand (age $\geq$ 18), 1999         | 1328   | 81.3   | 17.0                                             | 4.0       | 18.0             | 37.0              | 20.0                 | na            |
| Zimbabwe (age $\geq$ 18), 2000            | 2350   | 76.1   | 20.0                                             | 7.0       | 18.0             | 41.0              | 40.0                 | na            |
| Armenia (age $\geq$ 18), 2002             | 2222   | 66.6   | 26.0                                             | 13.0      | 28.0             | 64.0              | 52.0                 | na            |

NOTES: EQ5D-VAS: European Quality of Life 5 Dimension – Visual Analogue Scale; na – not available

STROBE 2007 (v4) Statement—Checklist of items that should be included in reports of *cross-sectional studies*

| Section/Topic                | Item # | Recommendation                                                                                                                                                                       | Reported on page #                                                                  |
|------------------------------|--------|--------------------------------------------------------------------------------------------------------------------------------------------------------------------------------------|-------------------------------------------------------------------------------------|
| Title and abstract           | 1      | (a) Indicate the study's design with a commonly used term in the title or the abstract                                                                                               | 1, 6                                                                                |
|                              |        | (b) Provide in the abstract an informative and balanced summary of what was done and what was found                                                                                  | 6                                                                                   |
| <b>Introduction</b>          |        |                                                                                                                                                                                      |                                                                                     |
| Background/rationale         | 2      | Explain the scientific background and rationale for the investigation being reported                                                                                                 | 8,9                                                                                 |
| Objectives                   | 3      | State specific objectives, including any prespecified hypotheses                                                                                                                     | 9                                                                                   |
| <b>Methods</b>               |        |                                                                                                                                                                                      |                                                                                     |
| Study design                 | 4      | Present key elements of study design early in the paper                                                                                                                              | 9                                                                                   |
| Setting                      | 5      | Describe the setting, locations, and relevant dates, including periods of recruitment, exposure, follow-up, and data collection                                                      | 9                                                                                   |
| Participants                 | 6      | (a) Give the eligibility criteria, and the sources and methods of selection of participants                                                                                          | 9, 10                                                                               |
| Variables                    | 7      | Clearly define all outcomes, exposures, predictors, potential confounders, and effect modifiers. Give diagnostic criteria, if applicable                                             | 10                                                                                  |
| Data sources/<br>measurement | 8*     | For each variable of interest, give sources of data and details of methods of assessment (measurement). Describe comparability of assessment methods if there is more than one group | 10, 11                                                                              |
| Bias                         | 9      | Describe any efforts to address potential sources of bias                                                                                                                            | 12 ( <i>adjusted regression model was run to adjust for potential confounders</i> ) |
| Study size                   | 10     | Explain how the study size was arrived at                                                                                                                                            | Not applicable – secondary data analysis                                            |
| Quantitative variables       | 11     | Explain how quantitative variables were handled in the analyses. If applicable, describe which groupings were chosen and why                                                         | 12                                                                                  |



|    |                          |     |                                                                                                                                                                                                              |
|----|--------------------------|-----|--------------------------------------------------------------------------------------------------------------------------------------------------------------------------------------------------------------|
| 1  |                          |     |                                                                                                                                                                                                              |
| 2  |                          |     |                                                                                                                                                                                                              |
| 3  |                          |     |                                                                                                                                                                                                              |
| 4  | Statistical methods      | 12  | (a) Describe all statistical methods, including those used to control for confounding                                                                                                                        |
| 5  |                          |     |                                                                                                                                                                                                              |
| 6  |                          |     | (b) Describe any methods used to examine subgroups and interactions                                                                                                                                          |
| 7  |                          |     | (c) Explain how missing data were addressed                                                                                                                                                                  |
| 8  |                          |     | (d) If applicable, describe analytical methods taking account of sampling strategy                                                                                                                           |
| 9  |                          |     | (e) Describe any sensitivity analyses                                                                                                                                                                        |
| 10 |                          |     |                                                                                                                                                                                                              |
| 11 | <b>Results</b>           |     |                                                                                                                                                                                                              |
| 12 | Participants             | 13* | (a) Report numbers of individuals at each stage of study—eg numbers potentially eligible, examined for eligibility, confirmed eligible, included in the study, completing follow-up, and analysed            |
| 13 |                          |     |                                                                                                                                                                                                              |
| 14 |                          |     | (b) Give reasons for non-participation at each stage                                                                                                                                                         |
| 15 |                          |     | (c) Consider use of a flow diagram                                                                                                                                                                           |
| 16 |                          |     |                                                                                                                                                                                                              |
| 17 | Descriptive data         | 14* | (a) Give characteristics of study participants (eg demographic, clinical, social) and information on exposures and potential confounders                                                                     |
| 18 |                          |     |                                                                                                                                                                                                              |
| 19 |                          |     | (b) Indicate number of participants with missing data for each variable of interest                                                                                                                          |
| 20 |                          |     |                                                                                                                                                                                                              |
| 21 | Outcome data             | 15* | Report numbers of outcome events or summary measures                                                                                                                                                         |
| 22 |                          |     |                                                                                                                                                                                                              |
| 23 | Main results             | 16  | (a) Give unadjusted estimates and, if applicable, confounder-adjusted estimates and their precision (eg, 95% confidence interval). Make clear which confounders were adjusted for and why they were included |
| 24 |                          |     |                                                                                                                                                                                                              |
| 25 |                          |     | (b) Report category boundaries when continuous variables were categorized                                                                                                                                    |
| 26 |                          |     | (c) If relevant, consider translating estimates of relative risk into absolute risk for a meaningful time period                                                                                             |
| 27 |                          |     |                                                                                                                                                                                                              |
| 28 | Other analyses           | 17  | Report other analyses done—eg analyses of subgroups and interactions, and sensitivity analyses                                                                                                               |
| 29 |                          |     |                                                                                                                                                                                                              |
| 30 | <b>Discussion</b>        |     |                                                                                                                                                                                                              |
| 31 | Key results              | 18  | Summarise key results with reference to study objectives                                                                                                                                                     |
| 32 |                          |     |                                                                                                                                                                                                              |
| 33 | Limitations              | 19  | Discuss limitations of the study, taking into account sources of potential bias or imprecision. Discuss both direction and magnitude of any potential bias                                                   |
| 34 |                          |     |                                                                                                                                                                                                              |
| 35 | Interpretation           | 20  | Give a cautious overall interpretation of results considering objectives, limitations, multiplicity of analyses, results from similar studies, and other relevant evidence                                   |
| 36 |                          |     |                                                                                                                                                                                                              |
| 37 | Generalisability         | 21  | Discuss the generalisability (external validity) of the study results                                                                                                                                        |
| 38 |                          |     |                                                                                                                                                                                                              |
| 39 | <b>Other information</b> |     |                                                                                                                                                                                                              |
| 40 | Funding                  | 22  | Give the source of funding and the role of the funders for the present study and, if applicable, for the original study on which the present article is based                                                |
| 41 |                          |     |                                                                                                                                                                                                              |
| 42 |                          |     |                                                                                                                                                                                                              |
| 43 |                          |     |                                                                                                                                                                                                              |
| 44 |                          |     |                                                                                                                                                                                                              |
| 45 |                          |     |                                                                                                                                                                                                              |
| 46 |                          |     |                                                                                                                                                                                                              |
| 47 |                          |     |                                                                                                                                                                                                              |
| 48 |                          |     |                                                                                                                                                                                                              |
| 49 |                          |     |                                                                                                                                                                                                              |

1  
2  
3  
4 \*Give information separately for cases and controls in case-control studies and, if applicable, for exposed and unexposed groups in cohort and cross-sectional studies.  
5

6 **Note:** An Explanation and Elaboration article discusses each checklist item and gives methodological background and published examples of transparent reporting. The STROBE  
7 checklist is best used in conjunction with this article (freely available on the Web sites of PLoS Medicine at <http://www.plosmedicine.org/>, Annals of Internal Medicine at  
8 <http://www.annals.org/>, and Epidemiology at <http://www.epidem.com/>). Information on the STROBE Initiative is available at [www.strobe-statement.org](http://www.strobe-statement.org).  
9  
10  
11  
12  
13  
14  
15  
16  
17  
18  
19  
20  
21  
22  
23  
24  
25  
26  
27  
28  
29  
30  
31  
32  
33  
34  
35  
36  
37  
38  
39  
40  
41  
42  
43  
44  
45  
46  
47  
48  
49

# BMJ Open

## Health-related Quality of Life Variations by Socio-demographic Factors and Chronic Conditions in three metropolitan cities of South Asia: The CARRS Study

|                                 |                                                                                                                                                                                                                                                                                                                                                                                                                                                                                                                                                                                                                                                                                                                                                                                                                                                                                                                                                             |
|---------------------------------|-------------------------------------------------------------------------------------------------------------------------------------------------------------------------------------------------------------------------------------------------------------------------------------------------------------------------------------------------------------------------------------------------------------------------------------------------------------------------------------------------------------------------------------------------------------------------------------------------------------------------------------------------------------------------------------------------------------------------------------------------------------------------------------------------------------------------------------------------------------------------------------------------------------------------------------------------------------|
| Journal:                        | <i>BMJ Open</i>                                                                                                                                                                                                                                                                                                                                                                                                                                                                                                                                                                                                                                                                                                                                                                                                                                                                                                                                             |
| Manuscript ID                   | bmjopen-2017-018424.R1                                                                                                                                                                                                                                                                                                                                                                                                                                                                                                                                                                                                                                                                                                                                                                                                                                                                                                                                      |
| Article Type:                   | Research                                                                                                                                                                                                                                                                                                                                                                                                                                                                                                                                                                                                                                                                                                                                                                                                                                                                                                                                                    |
| Date Submitted by the Author:   | 07-Sep-2017                                                                                                                                                                                                                                                                                                                                                                                                                                                                                                                                                                                                                                                                                                                                                                                                                                                                                                                                                 |
| Complete List of Authors:       | Singh, Kavita; All India Institute of Medical Sciences, Endocrinology & Metabolism; Public Health Foundation of India<br>Kondal, Dimple; Public Health Foundation of India<br>Shivashankar, Roopa; Public Health Foundation of India,<br>Ali, Mohammed; Emory University, Hubert Department of Global Health<br>Pradeepa, Rajendra; Madras Diabetes Research Foundation & Dr.Mohan's<br>Diabetes Specialities Centre, Epidemiology & Diabetology<br>Vamadevan, Ajay; Centre for Chronic Disease Control<br>Mohan, V; Madras Diabetes Research Foundation<br>Kadir, Muhammad ; Aga Khan University, Karachi, Pakistan, Community<br>Health Sciences<br>Sullivan, Mark; University of Washington School of Medicine,<br>Tandon, Nikhil; All India Institute of Medical Sciences,<br>Narayan, K; Emory University School of Public Health, Global Health<br>Prabhakaran, Dorairaj; Centre for Chronic Disease Control, ; Public Health<br>Foundation of India, |
| <b>Primary Subject Heading</b>: | Public health                                                                                                                                                                                                                                                                                                                                                                                                                                                                                                                                                                                                                                                                                                                                                                                                                                                                                                                                               |
| Secondary Subject Heading:      | Epidemiology, Global health, Health policy                                                                                                                                                                                                                                                                                                                                                                                                                                                                                                                                                                                                                                                                                                                                                                                                                                                                                                                  |
| Keywords:                       | Health related Quality of Life (HRQOL), EQ5D, Chronic conditions, South Asia, Visual Analogue Scale                                                                                                                                                                                                                                                                                                                                                                                                                                                                                                                                                                                                                                                                                                                                                                                                                                                         |
|                                 |                                                                                                                                                                                                                                                                                                                                                                                                                                                                                                                                                                                                                                                                                                                                                                                                                                                                                                                                                             |

SCHOLARONE™  
Manuscripts

1  
2  
3  
4  
5  
6  
7  
8  
9  
10  
11  
12  
13  
14  
15  
16  
17  
18  
19  
20  
21  
22  
23  
24  
25  
26  
27  
28  
29  
30  
31  
32  
33  
34  
35  
36  
37  
38  
39  
40  
41  
42  
43  
44  
45  
46  
47  
48  
49  
50  
51  
52  
53  
54  
55  
56  
57  
58  
59  
60

1 **Title**  
2 Health-related Quality of Life Variations by Socio-demographic Factors and Chronic  
3 Conditions in three metropolitan cities of South Asia: The CARRS Study  
4  
5

For peer review only

**Authors name, title, affiliation, address, contact details**

Ms. Kavita Singh, MSc, PhD Candidate  
Research Scientist, Centre for Chronic Conditions and Injuries (CCCI), Public Health  
Foundation of India (PHFI), and  
Centre for Chronic Disease Control (CCDC), and  
All India Institute of Medical Sciences, New Delhi  
4th floor, Plot no. 47, Sector-44, Gurgaon - 122 002, Haryana  
Office Landline - +91-124 - 4781400  
Fax - +91-124-4722901, Mobile - +91-9899691150  
Email: kavita@ccdcindia.org; kavita.singh@phfi.org

Dr. Dimple Kondal, MSc, PhD  
Biostatistician, Centre for Chronic Conditions and Injuries,  
Public Health Foundation of India  
4th floor, Plot no. 47, Sector-44, Gurgaon - 122 002, Haryana  
Office Landline - +91-124-4781400  
Fax - +91-124-4722901, Mobile - +91-9899691150  
Email: dimple.kondal@phfi.org

Dr. Roopa Shivashankar, MD, MSc  
Senior Research Scientist and Associate Professor,  
Centre for Chronic Conditions and Injuries,  
Public Health Foundation of India, and  
Centre for Chronic Disease Control  
4th floor, Plot no. 47, Sector-44, Gurgaon - 122 002, Haryana

1  
2  
3  
4  
5  
6  
7  
8  
9  
10  
11  
12  
13  
14  
15  
16  
17  
18  
19  
20  
21  
22  
23  
24  
25  
26  
27  
28  
29  
30  
31  
32  
33  
34  
35  
36  
37  
38  
39  
40  
41  
42  
43  
44  
45  
46  
47  
48  
49  
50  
51  
52  
53  
54  
55  
56  
57  
58  
59  
60

1 Office Landline - +91-0124 - 4781400

2 Fax - +91-0124-4722901, Mobile - +91-9899691150

3 Email: roopa@ccdcindia.org; roopa.shivashankar@phfi.org

4  
5 Dr. Mohammed K. Ali, MBChB, MSc, MBA

6 Associate Professor, Hubert Department of Global

7 Health and Department of Epidemiology,

8 Rollins School of Public Health, Emory University, and

9 1518 Clifton Road NE, Room 7041, Atlanta, GA, 30322, USA

10 Phone number: +1 404 727 9776

11 Email: mkali@emory.edu

12  
13 Dr. Rajendra Pradeepa, PhD

14 Head, Research Operations, Madras Diabetes Research Foundation

15 No.4, Conran Smith Road, Gopalapuram, Chennai 600086, India

16 Phone number: +91-44-43968888

17 Email: guhapradeepa@gmail.com

18  
19 Dr. Vamadevan S Ajay, MPH, PhD

20 Senior Research Scientist, Centre for Chronic Conditions and Injuries, Public Health

21 Foundation of India, and

22 Centre for Chronic Disease Control

23 4th Floor, Plot No. 47, Sector 44, Institutional Area

24 Gurgaon - 122 002, Haryana

25 Office Landline - +91-124-4781400

26 Email: ajay@ccdcindia.org

1  
2  
3  
4  
5  
6  
7  
8  
9  
10  
11  
12  
13  
14  
15  
16  
17  
18  
19  
20  
21  
22  
23  
24  
25  
26  
27  
28  
29  
30  
31  
32  
33  
34  
35  
36  
37  
38  
39  
40  
41  
42  
43  
44  
45  
46  
47  
48  
49  
50  
51  
52  
53  
54  
55  
56  
57  
58  
59  
60

1  
2

Dr. Viswanathan Mohan, MD, PhD

President and Director, Madras Diabetes Research Foundation

No.4, Conran Smith Road, Gopalapuram, Chennai 600086, India

Phone number: +91-44-43968888

Email: drmohans@diabetes.ind.in

7  
8  
9  
10  
11  
12  
13  
14  
15  
16  
17  
18  
19  
20  
21  
22  
23  
24  
25  
26  
27  
28  
29  
30  
31  
32  
33  
34  
35  
36  
37  
38  
39  
40  
41  
42  
43  
44  
45  
46  
47  
48  
49  
50  
51  
52  
53  
54  
55  
56  
57  
58  
59  
60

8

Dr. Muhammad M. Kadir, MBBS, FCPS

Professor, Aga Khan University, Department of Community Health Sciences,

Stadium Road, Karachi 74800, Pakistan

Phone number: +92 21 34930051

Email: masood.kadir@aku.edu

14  
15  
16  
17  
18  
19  
20  
21  
22  
23  
24  
25  
26  
27  
28  
29  
30  
31  
32  
33  
34  
35  
36  
37  
38  
39  
40  
41  
42  
43  
44  
45  
46  
47  
48  
49  
50  
51  
52  
53  
54  
55  
56  
57  
58  
59  
60

14

Dr. Mark Daniel Sullivan, MD, PhD

Professor, Psychiatry and Behavioral Sciences

Adjunct Professor, Anesthesiology and Pain Medicine, Bioethics and Humanities

Medical Director, UW Telepain

University of Washington, Box 356560, Seattle, WA 98195

Phone: +1-(206)685-3184, Fax: +1-(206) 221-5414

Email: sullimar@uw.edu

21  
22  
23  
24  
25  
26  
27  
28  
29  
30  
31  
32  
33  
34  
35  
36  
37  
38  
39  
40  
41  
42  
43  
44  
45  
46  
47  
48  
49  
50  
51  
52  
53  
54  
55  
56  
57  
58  
59  
60

22

Dr. Nikhil Tandon, MD, PhD

Professor and Head, Department of Endocrinology & Metabolism, All India Institute of Medical

Sciences,

Biotechnology Block, 3rd Floor, Rm #312, Ansari Nagar, New Delhi - 110 029, India

Phone: +91-9818211663

1  
2  
3  
4  
5  
6  
7  
8  
9  
10  
11  
12  
13  
14  
15  
16  
17  
18  
19  
20  
21  
22  
23  
24  
25  
26  
27  
28  
29  
30  
31  
32  
33  
34  
35  
36  
37  
38  
39  
40  
41  
42  
43  
44  
45  
46  
47  
48  
49  
50  
51  
52  
53  
54  
55  
56  
57  
58  
59  
60

1 Email: nikhil\_tandon@hotmail.com

2  
3  
4  
5  
6  
7  
8  
9  
10  
11  
12  
13  
14  
15  
16  
17  
18  
19  
20  
21  
22  
23  
24  
25  
26  
27  
28  
29  
30  
31  
32  
33  
34  
35  
36  
37  
38  
39  
40  
41  
42  
43  
44  
45  
46  
47  
48  
49  
50  
51  
52  
53  
54  
55  
56  
57  
58  
59  
60

1 Dr. KM Venkat Narayan, MD.

2 Ruth and O. C. Hubert, Professor of Global Health and Epidemiology, Rollins School of Public

3 Health,

4 Emory University

5 1518 Clifton Road NE, Room 7041, Atlanta, GA, 30322, USA

6 Phone number: +1 404 727 9776

7 Email: KNARAYA@emory.edu

8  
9  
10  
11  
12  
13  
14  
15  
16  
17  
18  
19  
20  
21  
22  
23  
24  
25  
26  
27  
28  
29  
30  
31  
32  
33  
34  
35  
36  
37  
38  
39  
40  
41  
42  
43  
44  
45  
46  
47  
48  
49  
50  
51  
52  
53  
54  
55  
56  
57  
58  
59  
60

1 Dr. Dorairaj Prabhakaran\*, MD, DM.

2 Vice President (Research and Policy),

3 Public Health Foundation of India, and

4 Director, Centre for Chronic Disease Control,

5 Professor, London School of Hygiene and Tropical Medicine, UK

6 4th floor, Plot no. 47, Sector-44, Gurgaon - 122 002, Haryana

7 Office Landline - 0124 - 4781400

8 Email: dprabhakaran@ccdcindia.org

9  
10  
11  
12  
13  
14  
15  
16  
17  
18  
19  
20  
21  
22  
23  
24  
25  
26  
27  
28  
29  
30  
31  
32  
33  
34  
35  
36  
37  
38  
39  
40  
41  
42  
43  
44  
45  
46  
47  
48  
49  
50  
51  
52  
53  
54  
55  
56  
57  
58  
59  
60

1 \*Corresponding author

1 **Word count:**

2 Abstract: 237 words

3 Main article: 3,553

4 Number of figures: 2

5 Number of Tables: 3

6 Appendix: Tables: 3



1

For peer review only

1  
2  
3  
4  
5  
6  
7  
8  
9  
10  
11  
12  
13  
14  
15  
16  
17  
18  
19  
20  
21  
22  
23  
24  
25  
26  
27  
28  
29  
30  
31  
32  
33  
34  
35  
36  
37  
38  
39  
40  
41  
42  
43  
44  
45  
46  
47  
48  
49  
50  
51  
52  
53  
54  
55  
56  
57  
58  
59  
60

1  
2  
3  
4  
5  
6  
7  
8  
9  
10  
11  
12  
13  
14  
15  
16  
17  
18  
19  
20  
21  
22  
23  
24  
25  
26  
27  
28  
29  
30  
31  
32  
33  
34  
35  
36  
37  
38  
39  
40  
41  
42  
43  
44  
45  
46  
47  
48  
49  
50  
51  
52  
53  
54  
55  
56  
57  
58  
59  
60

1 **ABSTRACT [237 words]**

2 **Objectives:** Health-related quality of life (HRQOL) is a key indicator of health. However,  
3 HRQOL data from representative populations in South Asia are lacking. This study aims  
4 to describe HRQOL overall, by age, gender, and socio-economic status (SES), and  
5 examine the associations between selected chronic conditions and HRQOL in adults  
6 from three urban cities in South Asia.

7 **Methods:** We used data from 16287 adults aged  $\geq 20$  years from the baseline survey of  
8 the Centre for Cardiometabolic Risk Reduction in South Asia (CARRS) cohort (2010-11).  
9 HRQOL was measured using the European Quality of Life 5 dimension - Visual Analogue  
10 Scale (EQ5D-VAS), which measures health status on a scale of 0 (worst health status) –  
11 100 (best possible health status).

12 **Results:** 16,284 participants completed EQ5D-VAS. Mean age was 42.4 (+/-13.3) years  
13 and 52.4% were women. 14% of the respondents reported problems in mobility, and  
14 pain/discomfort domains. Mean VAS score was 74 (95% confidence interval [CI]: 73.7,  
15 74.2). Significantly lower health status was found in elderly (64.1), women (71.6),  
16 unemployed (68.4), less educated (71.2) and low-income group (73.4). Individuals with  
17 chronic conditions reported worse health status than those without (67.4 vs. 76.2):  
18 Prevalence Ratio: 1.8 [95%CI: 1.61, 2.04].

19 **Conclusions:** Our data demonstrate significantly lower HRQOL in key demographic  
20 groups and those with chronic conditions, which are consistent with previous studies.  
21 These data provide insights on inequalities in population health status, and potentially  
22 reveal unmet needs in the community to guide health policies.

23 **Key words (5)**

24 Health related Quality of Life (HRQOL), EQ5D, Chronic conditions, South Asia, Visual  
25 Analogue Scale

## 1 Strengths and limitations of this study

- 2 • This is the first population level health related quality of life (HRQOL) data from  
3 South Asia using EQ5D-VAS including three large metropolitan cities in India and  
4 Pakistan with a large sample size (16,284 adults aged  $\geq 20$  years).
- 5 • Our data provide the first baseline values to be used for monitoring population  
6 health status and analysed the relationships between selected chronic conditions  
7 and HRQOL.
- 8 • HRQOL data presented in this article could be used to complement national  
9 health targets by providing a measure of chronic disease burden based on  
10 perceived health status rather than solely on mortality and disease prevalence.
- 11 • Due to the cross-sectional nature of the data, the causal relationship between  
12 socio-economic parameters or chronic conditions and HRQOL cannot be  
13 determined.
- 14 • Many chronic conditions (respiratory, locomotor, cancer, etc.) were not included  
15 in the survey. Therefore, the ranking of most severe health conditions and  
16 associated HRQOL is not complete.

1  
2  
3  
4  
5  
6  
7  
8  
9  
10  
11  
12  
13  
14  
15  
16  
17  
18  
19  
20  
21  
22  
23  
24  
25  
26  
27  
28  
29  
30  
31  
32  
33  
34  
35  
36  
37  
38  
39  
40  
41  
42  
43  
44  
45  
46  
47  
48  
49  
50  
51  
52  
53  
54  
55  
56  
57  
58  
59  
60

1 **Main article [3553 words]**

2 **Introduction**

3 Health-related Quality of Life (HRQOL) is a multidimensional concept that provides a  
4 broader perspective of health through conveying an individual's ability to function in  
5 physical, mental, and social domains of life (1). HRQOL is thus an essential patient-  
6 centred outcome measure, which is useful to guide health policies (2, 3). HRQOL is  
7 preferred over other health indicators (life expectancy, mortality, morbidity) for  
8 measuring chronic disease burden as it incorporates both length and quality of life (4).  
9 In South Asia, chronic conditions (diabetes, hypertension and heart diseases) occur at  
10 an early age (5) with detrimental effects on length and quality of life (6, 7). In addition,  
11 episodes and fear of hypoglycaemia, recurrent heart attacks, stroke and other long-term  
12 complications (kidney diseases, diabetic retinopathy) are not always measured as such,  
13 though they have a substantial adverse impact on an individual's overall health status  
14 (8). Therefore, it is important to quantify the effect of chronic conditions on individuals  
15 HRQOL.

16 There are several disease-specific (Chronic respiratory distress questionnaire, Arthritis  
17 Impact Measurement Scale) and generic instruments (Short Form 36, World Health  
18 Organization (WHO) – Quality of Life questionnaire, and European Quality of Life Five  
19 Dimensions – Visual Analogue Scale (EQ5D-VAS)) available to measure population  
20 HRQOL (4, 9-18). However, the EQ5D-VAS is favoured because it is generic, not specific  
21 to a particular disease, and it not only includes multidimensional measures of health  
22 profile in five dimensions (mobility, self-care, usual activities, pain/discomfort and  
23 anxiety/depression), but also includes the single-dimensional measure VAS, to  
24 summarize overall health status (1). Also, EQ5D-VAS has been applied and validated for

1 its use in many population surveys across the world, therefore, it makes the comparison  
2 of health status across populations easier.

3 Data on population HRQOL across socioeconomic status (SES) from South Asia are  
4 scarce, and little is known about the relative associations between different chronic  
5 conditions and individual HRQOL. The Centre for Cardio-metabolic Risk Reduction in  
6 South Asia (CARRS) study (19) had collected data on both EQ5D-VAS and selected  
7 chronic conditions from a large representative population of adults in urban South Asia.  
8 We used this opportunity to examine population HRQOL in this region. In this paper, we  
9 describe the variations in HRQOL by age, gender, and SES, and explore the relationships  
10 between selected chronic conditions and HRQOL in a representative sample of adults  
11 aged  $\geq 20$  years from three metropolitan cities in India and Pakistan. We also analysed  
12 the relationship between multidimensional EQ5D measures and single dimensional VAS  
13 across major subgroups.

## 14 **Methods**

### 15 **Study design and setting**

16 We obtained data from the baseline cross-sectional survey of the CARRS cohort (2010-  
17 11), which recruited a representative sample of non-pregnant adults aged  $\geq 20$  years  
18 from three urban cities: Chennai, Delhi, and Karachi. These metropolitan cities with  
19 large and heterogeneous populations in terms of demographic profile and economic  
20 transitions offer unique opportunities to assess variations in health status across  
21 different socio-economic groups. The detailed CARRS study design has been published  
22 elsewhere (19). Briefly, a multi-stage cluster random sampling strategy was used with  
23 wards (in Delhi and Chennai) or clusters (in Karachi) as the primary sampling units.  
24 Using the WHO STEPS survey “Kish method”, two participants, one male and one female,

1 aged  $\geq 20$  years (non-pregnant) and meeting the study eligibility criteria, were selected  
2 from each randomly selected household (19).

### 3 **Study measures**

4 Comprehensive and uniform data collection instruments were used to capture  
5 measurements in all three sites. A summary of all surveillance measures, methods, and  
6 instruments used in the study has been published in detail (19). Briefly, a questionnaire  
7 was administered to collect information regarding demographic, socio-economic,  
8 behavioural, and past and present health status of the participant.

9 Trained study staff measured anthropometric parameters (height, weight) using  
10 standardized techniques and blood pressure (BP) twice at each participant's home or at  
11 a medical camp organized in the community, after five minutes in a seated position  
12 using an electronic BP measuring device (Omron Dailan Co., China). If the difference  
13 between the first two systolic or diastolic BP readings was more than 10 mmHg or 5  
14 mmHg, respectively, a third reading was taken. Average BP readings of the two/three  
15 readings were recorded in the study database. Additionally, fasting blood glucose and  
16 glycated haemoglobin (HbA1c) were measured. The overall response rates were 94.7%  
17 for questionnaire completion and 84.3% for blood tests.

18 Population health status was measured using the EQ5D-VAS questionnaire, which  
19 consisted of two components; health state description and self-rated health status on  
20 VAS. Health state description (profile) includes five dimensions (5D); mobility (walking  
21 ability), self-care (ability to wash or dress by oneself), usual activities (ability to work,  
22 study, housework), pain/discomfort, and anxiety/depression. The respondents self-rate  
23 their level of severity for each dimension using three levels (EQ5D-3L): having no  
24 problems, having some or moderate problems, or being unable to do/having extreme  
25 problems. The respondents were asked to choose one of the statements which best  
26 described their health status on the surveyed day. For example, three levels of 'mobility'

1 dimension were phrased as "I have no problems in walking," "I have some problems in  
2 walking," and "I am confined to bed". Given the possible permutations of different  
3 domains and response types, there are potentially 243 ( $=3^5$ ) different health profiles.  
4 For overall health status, the respondents evaluated their health status using the VAS.  
5 The VAS asks respondents to mark health status on the day of the interview on a scale of  
6 0 (worst health status) – 100 (best imaginable health status).  
7 *Covariates:* Self-reported age at baseline in completed years was used and categorized  
8 into 20-24, 25-34, 35-44, 45-54, 55-64, 65-74 and  $\geq 75$ . Based on participant responses,  
9 we categorized employment status into employed, student, housewife, retired, and  
10 unemployed. Income class was grouped into three categories based on household  
11 monthly income: low-income: less than 10,000 Indian rupees (INR) (equivalent to  
12 US\$200), middle-income: 10,000-20,000 INR (US\$200-400) and high-income strata:  
13 greater than 20,000 INR (US\$400). We categorized highest education level attained into  
14 three categories - up to primary, secondary schooling, and graduates. The marital status  
15 was classified as: single, married, widowed, and divorced. Body mass index ( $\text{Kg}/\text{m}^2$ )  
16 international classification: of  $\leq 17.9$  was used to define the underweight, and 18.0-  
17 24.9=normal weight, 25.0-29.9=overweight and  $\geq 30.0$ =obese. Lifestyle habits like  
18 tobacco use was classified based on self-reports as never, former and current user. Data  
19 on chronic conditions consisted of self-reported hypertension, diabetes, heart disease,  
20 stroke, and kidney disease. In addition, diabetes was categorized into self-reported,  
21 newly diagnosed (defined by no self-reported diabetes and fasting blood glucose (FBG)  
22 of  $\geq 126$  mg/dl, or HbA1c  $\geq 6.5\%$ ), pre-diabetes (no self-reported diabetes and FBG  
23  $\geq 100$ -125 mg/dl or HbA1c  $\geq 5.7$ -6.4%) and normoglycemia (no self-reported diabetes  
24 and FBG $<100$  mg/dl and HbA1c $<5.7\%$ ). Similarly, we classified hypertension as: self-  
25 reported, newly diagnosed (no self-reported hypertension and BP  $\geq 140/90$ mmHg),

1 prehypertension (no self-reported hypertension and BP: 120-139 / 80-89 mmHg) and  
2 normotensive (no history of hypertension and BP <120/80 mmHg).

### 3 **Ethical considerations**

4 The CARRS study has obtained institutional ethics approval from each of the  
5 participating institutions: Public Health Foundation of India, All India Institute of  
6 Medical Sciences, New Delhi, Madras Diabetes Research Foundation, Chennai, Aga Khan  
7 University, Karachi and Rollins School of Public Health, Emory University, USA. Study  
8 participants provided written informed consent, before participation in the study.

### 9 **Analysis**

10 We used Stata (version 14.0 SE; StataCorp, TX, USA) for data analysis. We used the 'svy'  
11 command for all analysis to account for the complex survey design (20). Before any of  
12 the survey estimation commands were used, the svyset command was used to specify  
13 the variables that described the stratification, sampling weight, and primary sampling  
14 unit variables. This analysis included data obtained from 16,284 study participants. All  
15 the responses coded as refused, unknown, or missing were treated as missing data. The  
16 frequency (percentages) and mean were reported to display the level of population  
17 health status and the sample characteristics. Percentages of those reporting any  
18 problems in EQ5D domains and mean VAS were stratified by respondent's demographic  
19 characteristics - age, gender, marital status, and SES - education, income, and  
20 employment status; and health-related indicators - presence of chronic conditions, were  
21 reported. Additionally, prevalence-ratios of moderate or severe health problems in  
22 people with and without chronic conditions were estimated using log binomial  
23 regression. Where the model did not reach convergence Poisson regression model was  
24 used. The model was adjusted for socio-demographic covariates (age, gender, marital  
25 status, education level, and household income) and city. Linear regression analysis was  
26 performed to explore the relationship between the VAS and the EQ5D measures across



1 major subgroups. In the regression model, VAS was used as a dependent variable, and  
2 EQ5D measures were treated as independent variables.

## 3 4 **Study Results**

### 5 **Characteristics of the study population**

6 A total of 17,274 individuals in 10,002 households were approached in the three study  
7 sites (7,596 participants in Chennai, 5,420 in Delhi, 4,258 in Karachi). From these, a  
8 total of 16,287 participants were recruited (the overall response rate was 94.3% at the  
9 participant level; 6,906 Chennai [90.9%], 5,364 Delhi [98.9%], and 4,017 Karachi  
10 [94.3%]). Detailed baseline characteristics of the CARRS cohort is published elsewhere  
11 (21-24). Briefly, mean age was 42.4 (+/- 13.3), 52.4% were females, 61% completed  
12 secondary schooling, and the majority of respondents (72.5%) reported household  
13 income level <INR. 10,000 (US\$200). Two-third (66%) of the study population had BMI  
14  $\geq 25$ , and one-fifth (20%) of the respondents reported current tobacco use and 37.5%  
15 had self-reported chronic conditions (hypertension, diabetes, heart disease, stroke or  
16 chronic kidney disease).

### 17 **Overall HRQOL by age and gender**

18 A total of 16,284 study participants completed the EQ5D-VAS [99.9%]. Overall, the  
19 percentage of respondents reporting any problems in mobility and pain/discomfort  
20 (14% each) were higher than for other domains. Greater health problems were  
21 observed with higher age for both men and women (p-value <0.001). [Table 1].  
22 Problems with mobility were higher with advancing age. However, problems with  
23 anxiety/depression did not show such trend. Average health status (VAS) reported by  
24 the CARRS cohort was 74.5 (95% CI 73.7 – 74.2). [Figure 1]. Women reported lower  
25 health status than men (71.6 vs.79.0; p-value<0.001).

1 74% of the respondents rated a perfect health profile with no difficulties in any EQ-5D  
2 domain, and 0.06% rated the worst health profile whereby they had difficulties with  
3 every EQ-5D domain. The distribution of the VAS scores was skewed in the direction of  
4 best-imagined health state. Only 0.5% respondents rated their health status on VAS  
5 under 10, and 10% rated it under 50 [Appendix 1].

### 6 **HRQOL and socio-economic status**

7 **Table 2 and Figure 2** depicts the mean VAS, percentage, and prevalence ratios of  
8 respondents reporting moderate or severe problems in the five dimensions, across  
9 various sub-groups, respectively. Employed adults and students reported better health  
10 status than homemakers, retired, or unemployed participants. We observed almost  
11 equal health status in homemakers and retired people. Health status was also similar in  
12 the middle- and high-income groups, while it was significantly lower in the low-income  
13 group. Individuals with higher education (graduate and above) and high income had  
14 higher HRQOL than those with secondary or primary schooling and low-income class.  
15 Also, individuals with BMI  $\geq 18-24$  Kg/m<sup>2</sup> reported better health status, than those with  
16 BMI  $\geq 25$  Kg/m<sup>2</sup>. Current tobacco users reported better health status than former  
17 tobacco users or non-users. However, in a stratified analysis of HRQOL in tobacco users  
18 by presence or absence of chronic conditions, tobacco users with chronic conditions  
19 reported worse health status than non-users.

### 20 **HRQOL and chronic conditions**

21 Overall, individuals with chronic conditions reported lower health status than those  
22 without chronic conditions. About half of the respondents with self-reported diabetes,  
23 hypertension, stroke, heart disease, or chronic kidney disease reported moderate or  
24 severe problems in all five domains (Table 2).

25 **Table 3** presents the adjusted prevalence ratio of moderate or severe problems among  
26 people with versus without chronic conditions, stratified by sex and cities. Individuals

1 with chronic conditions reported two times greater problems in mobility, usual  
2 activities domains, pain/discomfort, and anxiety/depression, than in individuals  
3 without chronic conditions.

4 Further, a small proportion of individuals with chronic conditions, mostly those with  
5 hypertension (10.5%) or diabetes (8.3%) reported having a perfect health state.

### 6 **Relationship between VAS and EQ5D measures across major sub-groups**

7 We expected that each EQ5D dimension would have an independent relationship with  
8 VAS since each of them represents a different aspect of HRQOL. **Appendix 2** provides the  
9 beta coefficients of the weighted regression models (i.e., with the application of the  
10 population sampling weights). In the overall population, having any problems in  
11 mobility, self-care, pain/discomfort, and anxiety/depression were associated with VAS  
12 scores that were 10-12 points lower. This inverse relationship of lower VAS with higher  
13 domain difficulties was larger in men, elderly (>60 years), low-income, less educated,  
14 divorced, and high BMI individuals, compared to their respective counterparts. Tobacco  
15 users who reported difficulties in all domains of EQ5D had lower VAS scores (indicating  
16 lower quality of life). Kidney disease and stroke were the most disabling conditions on  
17 all measures.

### 18 **Discussion**

19 Comparative assessments of HRQOL variations by socio-demographic factors and  
20 chronic conditions aid in prioritizing public health targets for intervention. Results from  
21 this study indicate that less than 10% of the respondents rated their health status as  
22 100 (i.e. best imagined health state) on VAS. Mobility, pain/discomfort, and anxiety  
23 /depression were the most commonly reported problems, with the extent of these  
24 problems differing across population subgroup. Elderly (>60 years) and women

1  
2  
3  
4  
5  
6  
7  
8  
9  
10  
11  
12  
13  
14  
15  
16  
17  
18  
19  
20  
21  
22  
23  
24  
25  
26  
27  
28  
29  
30  
31  
32  
33  
34  
35  
36  
37  
38  
39  
40  
41  
42  
43  
44  
45  
46  
47  
48  
49  
50  
51  
52  
53  
54  
55  
56  
57  
58  
59  
60

1 reported significantly greater problems in the mobility, pain/discomfort and  
2 anxiety/depression domains.

3 The mean VAS in our study was 74.5, which is lower than reported by most western  
4 countries (82.5), but comparable to the results from other low- and middle-income  
5 countries (LMIC) (71.1 - 77.8) [Appendix 3] (25-28). Lower health status reported by  
6 urban South Asians can be interpreted in a number of ways. The lower scores may be  
7 related to generally lower reporting of HRQOL among this group. Alternatively, these  
8 scores may reflect morbidity and sub-optimal access to healthcare facilities to address  
9 health concerns. South Asians experience chronic conditions at relatively younger ages  
10 than other race/ethnic groups and the associated reductions in productivity and income  
11 levels may be manifested in these self-reported EQ5D-VAS scores.

12 A higher percentage of individuals reported problems in mobility dimension (14-17%)  
13 in South Asia, which is comparable to results from other LMIC (29). However, problems  
14 in anxiety/depression are pretty low in South Asia when compared to the rest of the  
15 world; this could be due to under diagnoses of depression related problems or stigma  
16 attached to these health conditions. These patterns could also reflect differences in how  
17 adults in different parts of the world self-rate their health.

18 Worse health status in retired or homemakers, compared to employed persons may be  
19 related to being homebound or reflect underlying illnesses that may be the factor  
20 driving these participants to be homebound and not employed.

21 In terms of modifiable risk factors, maintaining a healthy BMI cut-off (18-25 Kg/m<sup>2</sup>) is  
22 favoured because, individuals with BMI <18 Kg/m<sup>2</sup> and ≥25 Kg/m<sup>2</sup>, reported greater  
23 problems in all five domains. Although, previous studies have shown that lower levels  
24 (intensity) of tobacco use are linked with higher HRQOL and regular tobacco users with

1 worse health status (30, 31), in our study, former tobacco users reported lower HRQOL  
2 than current users. This finding may indicate reverse causality, i.e. former tobacco users  
3 after experiencing an illness would have quit smoking/tobacco. Further, supported by  
4 the fact that tobacco users with chronic conditions or greater difficulties in EQ5D  
5 domains had lower VAS scores is suggestive that morbidity and not the habit of tobacco  
6 use per se are more closely related to participants' perception of health. However, a  
7 causal link between tobacco use and HRQOL cannot be confirmed in this cross-sectional  
8 study. Longitudinal analyses of the independent associations between the  
9 smoking/tobacco with HRQOL may provide a better understanding of this relationship.

10 Notably, one in five individuals living with known hypertension or diabetes (average  
11 disease duration four years) still reported a perfect health state, indicating that these  
12 individuals may feel asymptomatic until they experience a clinical event. Also, very  
13 small proportions of patients with heart disease and stroke (with longer duration of  
14 illness; average nine years), reported perfect health states, suggesting that these  
15 individuals may have adapted to their conditions over time and maybe benefiting from  
16 treatment and self-care that improves their self-rated quality of life. However, we did  
17 not investigate whether these other factors like adherence influence quality life in those  
18 living with chronic conditions.

19 Due to the differences in statistical analyses, HRQOL measures, socio-demographic  
20 characteristics of the sample, and medical conditions selected, the results of this study  
21 may not be directly comparable to reports from other countries (32). Nevertheless, a  
22 few differences and common findings are noteworthy. Individuals with stroke or  
23 chronic kidney disease rated the lowest health status, which is consistent with results  
24 reported from other studies done in China, Thailand, and Western populations (28, 33-  
25 36). Since the respondent's health status could be affected by how well the condition

1 was managed, caution is needed in interpreting study results regarding the relative  
2 effect of chronic conditions on HRQOL (37-41). A more recent Canadian study  
3 conducted by Mo *et al.* indicated a strong relationship between low health utility index  
4 (HUI) scores and certain chronic conditions (42). The authors found that arthritis/  
5 rheumatism, heart disease, hypertension, cataracts, and diabetes had a negative impact  
6 on HRQOL. In the US, Medical Expenditure Panel Survey data based study reported that,  
7 after adjusting for socio-demographic variables, all of the selected chronic conditions  
8 were associated with lower EQ5D scores, with effects greatest for emphysema, followed  
9 by heart disease, stroke, high BP, diabetes, and asthma(43, 44).

#### 10 *Strengths and limitations of this study*

11 To our knowledge, this is the first population level HRQOL data from South Asia using  
12 EQ5D-VAS including three large metropolitan cities in India and Pakistan with a large  
13 sample size that has used multistage cluster random sampling strategy and  
14 standardized protocols and measurement tools across sites. Our data provide the first  
15 baseline values to be used for monitoring population health status and analysed the  
16 relationships between selected chronic conditions and HRQOL. This information could  
17 be used to complement national targets by providing a measure of chronic disease  
18 burden based on perceived health status rather than solely on mortality and disease  
19 prevalence. In our secondary data analysis, EQ5D and VAS measures correlated well,  
20 which confirms the convergent and discriminate validity of the EQ5D instrument.

21 There are several limitations to this study. First, due to the cross-sectional nature of the  
22 data, the causal relationship between socio-economic parameters/chronic conditions  
23 and HRQOL cannot be determined and is not implied. Second, many chronic conditions  
24 (respiratory, locomotor, cancer, etc.) were not included in the survey. Therefore, the  
25 ranking of most severe health conditions and associated HRQOL is not complete. Third,

1 the selected chronic conditions were self-reported, and the study investigators did not  
2 examine the accuracy of information. However, this poses less of a threat to validity  
3 because self-reporting of heart diseases, stroke, and kidney diseases are pretty accurate  
4 in community surveys (45-48). Further, hypertension and diabetes were measured in  
5 this study using standardized methods. Lastly, EQ5D data were self-reported and the  
6 variation in how individuals perceive disability varies widely. However, this should be  
7 less of a problem given the large sample size in this study. Fourth, the findings of this  
8 study may not be replicable if researchers use a different HRQOL instrument (49-54),  
9 which can be tested in a future study.

### 11 ***Public health relevance and Policy implications***

12 HRQOL data from this study provide baseline values for monitoring variations in health  
13 for specific population groups on the basis of gender, education, employment, income,  
14 presence of chronic conditions and place of residence. This data is also relevant to  
15 assess the overall burden of physical and mental health problems that are not disease-  
16 specific. In aggregate form, such information could be used to complement national  
17 health targets by providing a measure based on health status (quality of life) rather than  
18 mortality or disease prevalence alone. Therefore, the policy makers can use the HRQOL  
19 measures and resulting data from this study to minimise health disparities and allocate  
20 resources among competing health programs based on burden of physical or mental  
21 health problems in a specific group(55).

22 The lower health status reported by females, less educated, unemployed, and  
23 low-income groups may indicate higher levels of stress in these groups (17). Other  
24 potential contributing factors that are known to influence health status are living  
25 conditions, gross domestic product (GDP) per capita, inequities in income distributions,

1 and access to healthcare (56-61). Therefore, public health initiatives should focus on  
2 inter-sectoral approaches to address issues of education, generating more avenues for  
3 employment, and improving the quality and access of primary healthcare.

4 Lastly, the issue of 'clinical' or 'policy' relevance of the difference in EQ5D  
5 measures needs much discourse. For example, if the VAS in two groups of the  
6 population is 5 or 10 points different from each other, we cannot make a clinical  
7 judgment on how much these two groups would differ in their actual health status.  
8 These issues relate to determining a minimally significant difference/change in HRQOL  
9 and needs investigation in future studies. However, because of HRQOL sensitivity to  
10 time trends as shown in previous studies(62-64), these measures are also likely to be  
11 useful in determining the effect of major population-based policies or interventions.

## 12 **Conclusion**

13 HRQOL appears to be lower with higher age and among women in South Asia. Our data  
14 demonstrates significantly lower HRQOL in key demographic groups and those with  
15 chronic conditions, which are consistent with previous studies. These data provide  
16 insights on inequalities in population health status, and potentially reveal unmet needs  
17 in the community to guide health policies.

18  
19 **Funding:** The CARRS Study was funded in whole or in part by the National Heart, Lung,  
20 and Blood Institute of the National Institutes of Health, Department of Health and  
21 Human Services (contract no. HHSN268200900026C) and the United Health Group  
22 (Minneapolis, MN, USA). Roopa Shivashankar is supported by a Wellcome Trust  
23 Capacity Strengthening Strategic Award Extension phase to the Public Health  
24 Foundation of India and a consortium of UK universities (WT084754/Z/08/A).



1 **Conflict of Interest:** All authors [KS, DK, RS, MKA, RP, VSA, VM, MMK, MDS, NT KMVN,  
2 and DP) declare that they have no conflict of interest to report.

3 **Author's contribution:** KS, DP, MKA, RS, NT and KMVN conceptualized and designed  
4 the study. KS wrote the first draft of the manuscript. KS and DK performed statistical  
5 analysis. RS, VSA, MKA, RP, VM, MMK, MDS, NT, KMVN, and DP contributed significantly  
6 in the revision of the manuscript. All authors have approved the submission of this  
7 version of the manuscript.

8  
9 **Data sharing statement:** KS, DK, and DP have access to study dataset and statistical  
10 code. Any request for data sharing should be addressed to the corresponding author  
11 (DP).

12

## 1 Tables

Table 1 - Percentage of respondents reporting moderate or severe problems in EQ5D domains, stratified by age and gender

| EQ5D Dimensions           | 20-24 years | 25-34 years | 35-44 years | 45-54 years | 55-64 years | 65-74 years | ≥75 years   | Overall     |
|---------------------------|-------------|-------------|-------------|-------------|-------------|-------------|-------------|-------------|
| <b>Overall (N)</b>        | 1179        | 3752        | 4672        | 3539        | 2005        | 878         | 262         | 16287       |
| Males (N)                 | 591         | 1614        | 2128        | 1723        | 1026        | 500         | 178         | 7760        |
| Females (N)               | 588         | 2138        | 2544        | 1816        | 979         | 378         | 84          | 8527        |
| <b>Mobility</b>           |             |             |             |             |             |             |             |             |
| All respondents (%)       | 5.3         | 8.3         | 13.6        | 18.1        | 23.5        | 31.2        | 39          | 14.6        |
| 95% CI                    | [4.0,7.0]   | [6.8,10.0]  | [11.7,15.9] | [16.1,20.3] | [20.8,26.4] | [27.5,35.2] | [32.7,45.6] | [13.3,15.9] |
| Male (%)                  | 2.9         | 3.6         | 6           | 8.7         | 17          | 20.5        | 34.7        | 8.2         |
| 95% CI                    | [1.5,5.6]   | [2.6,5.0]   | [4.8,7.3]   | [7.2,10.4]  | [14.1,20.4] | [16.7,24.9] | [27.5,42.7] | [7.3,9.2]   |
| Female (%)                | 7.8         | 11.8        | 20.1        | 26.9        | 30.6        | 45.6        | 48          | 20.3        |
| 95% CI                    | [5.9,10.2]  | [9.7,14.4]  | [17.1,23.4] | [24.0,29.9] | [26.5,35.1] | [40.8,50.6] | [36.2,60.1] | [18.5,22.3] |
| <b>Self-care</b>          |             |             |             |             |             |             |             |             |
| All respondents (%)       | 1.6         | 2.6         | 3.8         | 4.7         | 6.9         | 9           | 14.6        | 4.2         |
| 95% CI                    | [1.0,2.8]   | [2.0,3.5]   | [2.9,5.0]   | [3.8,5.7]   | [5.4,8.8]   | [6.9,11.8]  | [10.3,20.2] | [3.6,4.9]   |
| Male (%)                  | 1.2         | 1.5         | 1.7         | 2.7         | 5.1         | 5.2         | 14          | 2.6         |
| 95% CI                    | [0.4,3.6]   | [0.8,2.5]   | [1.0,2.9]   | [1.8,3.9]   | [3.1,8.2]   | [3.3,8.0]   | [8.9,21.5]  | [2.0,3.3]   |
| Female (%)                | 2.1         | 3.5         | 5.5         | 6.5         | 8.9         | 14.2        | 15.6        | 5.6         |
| 95% CI                    | [1.2,3.5]   | [2.5,5.0]   | [4.1,7.5]   | [5.2,8.2]   | [6.7,11.6]  | [10.6,18.7] | [9.4,24.9]  | [4.6,6.8]   |
| <b>Usual activities</b>   |             |             |             |             |             |             |             |             |
| All respondents (%)       | 2           | 3.5         | 4.8         | 7.1         | 10.7        | 16.6        | 23.1        | 6.0         |
| 95% CI                    | [1.2,3.2]   | [2.8,4.4]   | [3.8,5.9]   | [6.0,8.4]   | [8.9,12.8]  | [13.9,19.7] | [17.8,29.4] | [5.4,6.8]   |
| Male (%)                  | 1.3         | 1.4         | 1.8         | 3.2         | 6.4         | 11          | 19.7        | 3.2         |
| 95% CI                    | [0.5,3.7]   | [0.9,2.1]   | [1.2,2.7]   | [2.3,4.3]   | [4.8,8.6]   | [7.9,15.2]  | [13.8,27.2] | [2.7,3.9]   |
| Female (%)                | 2.6         | 5.1         | 7.2         | 10.7        | 15.4        | 24.1        | 30.3        | 8.5         |
| 95% CI                    | [1.6,4.3]   | [4.0,6.6]   | [5.6,9.2]   | [8.8,12.9]  | [12.3,19.1] | [20.4,28.1] | [20.7,42.0] | [7.4,9.7]   |
| <b>Pain/Discomfort</b>    |             |             |             |             |             |             |             |             |
| All respondents (%)       | 6           | 9.2         | 13.4        | 18.6        | 20.4        | 27.1        | 30.3        | 14.3        |
| 95% CI                    | [4.4,8.1]   | [7.7,10.9]  | [11.5,15.5] | [16.6,20.7] | [17.9,23.1] | [23.3,31.2] | [24.1,37.2] | [13.0,15.6] |
| Male (%)                  | 3.6         | 5.5         | 7.6         | 10.6        | 14.1        | 16.5        | 28          | 8.9         |
| 95% CI                    | [2.3,5.7]   | [4.0,7.3]   | [6.0,9.6]   | [9.1,12.4]  | [11.4,17.4] | [13.1,20.7] | [20.7,36.7] | [8.0,9.9]   |
| Female (%)                | 8.5         | 11.9        | 18.2        | 25.9        | 27.2        | 41.2        | 35.1        | 19.1        |
| 95% CI                    | [5.7,12.3]  | [9.8,14.5]  | [15.5,21.3] | [23.0,29.1] | [23.5,31.1] | [35.6,47.0] | [25.0,46.7] | [17.1,21.2] |
| <b>Anxiety/Depression</b> |             |             |             |             |             |             |             |             |
| All respondents (%)       | 4.9         | 5.8         | 7.6         | 9.9         | 10.9        | 13.7        | 18          | 8.1         |
| 95% CI                    | [3.7,6.6]   | [4.8,7.0]   | [6.5,8.9]   | [8.7,11.4]  | [9.4,12.7]  | [11.2,16.7] | [13.3,23.7] | [7.4,8.9]   |
| Male (%)                  | 3.7         | 4.1         | 5.4         | 6.7         | 8.7         | 7.6         | 15.7        | 5.9         |
| 95% CI                    | [2.2,6.0]   | [3.1,5.5]   | [4.3,6.8]   | [5.2,8.5]   | [6.8,11.0]  | [5.4,10.7]  | [10.7,22.6] | [5.2,6.7]   |
| Female (%)                | 6.2         | 7.0         | 9.5         | 13          | 13.4        | 21.9        | 22.7        | 10.1        |
| 95% CI                    | [4.4,8.6]   | [5.6,8.8]   | [7.9,11.4]  | [11.0,15.2] | [11.1,16.1] | [18.0,26.5] | [14.0,34.6] | [9.1,11.3]  |

2

3 **Abbreviations:** CI – confidence interval, EQ5D – European Quality of Life 5 dimension, N –  
4 number of participants

1  
2  
3  
4  
5  
6  
7  
8  
9  
10  
11  
12  
13  
14  
15  
16  
17  
18  
19  
20  
21  
22  
23  
24  
25  
26  
27  
28  
29  
30  
31  
32  
33  
34  
35  
36  
37  
38  
39  
40  
41  
42  
43  
44  
45  
46  
47  
48  
49  
50  
51  
52  
53  
54  
55  
56  
57  
58  
59  
60

1 **Figure 1 - Mean self-rated health status using EQ5D-VAS of respondents by age groups**  
2 **and gender**

3

4

5

6 **Figure Legend:** This figure presents the mean self-rated health status for overall study  
7 population by age-groups and gender. European Quality of Life 5 Dimension - Visual  
8 Analogue Scale (EQ5D-VAS) measures health status on a scale of 0 (worst health status) –  
9 100 (best imaginable health status)

10 \* **P-value for difference between mean EQ5D-VAS between males and females at each**  
11 **age-group is statistically significant;  $p < 0.01$ .**

1  
2  
3  
4  
5  
6  
7  
8  
9  
10  
11  
12  
13  
14  
15  
16  
17  
18  
19  
20  
21  
22  
23  
24  
25  
26  
27  
28  
29  
30  
31  
32  
33  
34  
35  
36  
37  
38  
39  
40  
41  
42  
43  
44  
45  
46  
47  
48  
49  
50  
51  
52  
53  
54  
55  
56  
57  
58  
59  
60

1 **Figure 2 – Prevalence ratio of moderate or severe health problems by socio-**  
2 **demographic factors and chronic conditions**

3  
4 **Figure 2.a.** shows the prevalence ratio of moderate or severe difficulties in EQ5D domains  
5 (mobility, self-care, usual activities, pain/discomfort, anxiety/depression and any of the five  
6 dimensions) by employment status. With reference to those who were employed (PR=1),  
7 housewife, retired, and unemployed reported greater problems in all five domains. Whereas,  
8 students only reported higher anxiety problems compared to employed.

9  
10 **Figure 2.b.** shows the prevalence ratio of moderate or severe difficulties in EQ5D domains  
11 by income-group. With reference to low-income group (PR=1), those in middle- or high-  
12 income groups had less problems in all five domains.

13  
14 **Figure 2.c.** shows the prevalence ratio of moderate or severe difficulties in EQ5D domains  
15 (mobility, self-care, usual activities, pain/discomfort, anxiety/depression and any of the five  
16 dimensions) by education level. With reference to those primary school education (PR=1),  
17 individuals with secondary school or graduates reported significantly lower problems in all  
18 five domains.

19  
20 **Figure 2.d.** shows the prevalence ratio of moderate or severe difficulties in EQ5D domains  
21 by marital status. With reference to single (PR=1), those who were married, widower, or  
22 divorcee had greater problems in all five domains.

23  
24 **Figure 2.e.** shows the prevalence ratio of moderate or severe difficulties in EQ5D domains  
25 (mobility, self-care, usual activities, pain/discomfort, anxiety/depression and any of the five  
26 dimensions) by body mass index (BMI). With reference to underweight i.e. BMI <18Kg/m<sup>2</sup>  
27 (PR=1), individuals with overweight (BMI 25-29.9 Kg/m<sup>2</sup>) or obesity (BMI ≥30Kg/m<sup>2</sup>)  
28 reported significantly greater problems in all five domains.

29  
30 **Figure 2.f.** shows the prevalence ratio of moderate or severe difficulties in EQ5D domains by  
31 chronic conditions. Compared to those without chronic conditions, individuals with self-  
32 reported diabetes, hypertension, heart disease, stroke and kidney disease had twice greater  
33 problems in all five domains.

34  
35 **Abbreviations:** AD – Any Dimension, HRQOL – Health-related quality of life, SC – Self-Care, UA –  
36 Usual Activities; PR – Prevalence Ratio, EQ5D – European Quality of Life 5 dimension

Table 2 - Mean EQ-VAS and percentages of respondents reporting moderate or severe problems by various subgroups

|                                                       | No. of respondents | EQ-VAS Mean | 95%CI       | Mobility (%) | 95%CI       | Self-care (%) | 95%CI      | Usual activities (%) | 95%CI      | Pain/discomfort (%) | 95%CI       | Anxiety/depression (%) | 95%CI      |
|-------------------------------------------------------|--------------------|-------------|-------------|--------------|-------------|---------------|------------|----------------------|------------|---------------------|-------------|------------------------|------------|
| <b>Cities</b>                                         |                    |             |             |              |             |               |            |                      |            |                     |             |                        |            |
| Chennai                                               | 6906               | 70.7        | [70.1,71.4] | 17.3         | [15.4,19.4] | 7.8           | [6.5,9.2]  | 7.7                  | [6.6,9.0]  | 10.3                | [9.1,11.7]  | 11.4                   | [9.8,13.1] |
| Delhi                                                 | 5364               | 78.8        | [77.8,79.8] | 14.1         | [11.9,16.7] | 1.6           | [1.2,2.1]  | 4.4                  | [3.4,5.7]  | 19.4                | [16.9,22.2] | 5.2                    | [4.0,6.6]  |
| Karachi                                               | 4017               | 73.2        | [72.6,73.8] | 10.4         | [9.4,11.5]  | 1.9           | [1.5,2.4]  | 5.6                  | [4.9,6.4]  | 12.9                | [11.8,14.2] | 7.2                    | [6.3,8.1]  |
| <b>Employment status</b>                              |                    |             |             |              |             |               |            |                      |            |                     |             |                        |            |
| Employed                                              | 7635               | 77.2        | [76.4,78.1] | 8.7          | [7.7,9.9]   | 2.4           | [1.8,3.1]  | 2.8                  | [2.3,3.4]  | 9.3                 | [8.3,10.4]  | 6.2                    | [5.4,7.1]  |
| Student                                               | 361                | 77.5        | [75.2,79.7] | 6.5          | [4.1,10.0]  | 1.5           | [0.7,3.4]  | 2.6                  | [1.3,4.9]  | 8.3                 | [5.4,12.7]  | 7.0                    | [4.4,10.8] |
| Homemakers                                            | 6781               | 71.6        | [70.7,72.4] | 20.9         | [18.9,22.9] | 5.7           | [4.8,6.8]  | 9.0                  | [7.8,10.4] | 19.7                | [17.6,22.0] | 9.9                    | [8.9,11.0] |
| Retired                                               | 765                | 71.6        | [69.9,73.3] | 21.0         | [17.7,24.6] | 7.7           | [5.7,10.3] | 11.0                 | [8.5,14.0] | 18.1                | [15.0,21.8] | 9.0                    | [7.0,11.5] |
| Unemployed                                            | 743                | 68.3        | [66.8,69.9] | 17.1         | [13.6,21.2] | 7.7           | [5.7,10.5] | 9.5                  | [7.3,12.4] | 16.1                | [13.2,19.6] | 12.3                   | [9.8,15.2] |
| <b>Income class</b>                                   |                    |             |             |              |             |               |            |                      |            |                     |             |                        |            |
| Low income group (INR <10000 or US\$ 155)             | 11537              | 73.4        | [72.7,74.1] | 15.2         | [13.9,16.7] | 4.8           | [4.1,5.7]  | 6.8                  | [6.0,7.6]  | 14                  | [12.7,15.4] | 9.2                    | [8.3,10.1] |
| Middle income group (INR 10000-20000 or US\$ 155-310) | 2667               | 75.8        | [74.8,76.9] | 14.6         | [12.6,16.8] | 3.5           | [2.6,4.7]  | 4.9                  | [3.9,6.1]  | 14.5                | [12.4,17.0] | 6.4                    | [5.3,7.6]  |
| High income group (INR >20000 or US\$ >310)           | 1975               | 77.1        | [75.9,78.3] | 11.0         | [8.8,13.8]  | 1.5           | [1.0,2.2]  | 3.4                  | [2.3,4.9]  | 15.5                | [12.8,18.6] | 5.0                    | [3.9,6.4]  |
| <b>Education status</b>                               |                    |             |             |              |             |               |            |                      |            |                     |             |                        |            |
| Up to primary school                                  | 3604               | 71.1        | [70.1,72.2] | 21.6         | [19.5,24.0] | 5.6           | [4.7,6.7]  | 9.8                  | [8.5,11.2] | 20.8                | [18.5,23.3] | 10.9                   | [9.6,12.4] |
| Secondary school                                      | 9924               | 74.3        | [73.5,75.1] | 14.0         | [12.6,15.5] | 4.5           | [3.7,5.3]  | 5.8                  | [5.1,6.7]  | 13.0                | [11.8,14.4] | 8.1                    | [7.3,9.0]  |
| Graduation and above                                  | 2759               | 77.9        | [76.9,78.8] | 8.3          | [6.7,10.2]  | 1.6           | [1.1,2.2]  | 2.3                  | [1.7,3.1]  | 10.8                | [9.0,12.8]  | 5.0                    | [4.1,6.0]  |
| <b>Marital Status</b>                                 |                    |             |             |              |             |               |            |                      |            |                     |             |                        |            |
| Single                                                | 1177               | 78.2        | [76.9,79.6] | 6.7          | [5.2,8.7]   | 1.6           | [0.9,2.9]  | 2.0                  | [1.2,3.2]  | 7.1                 | [5.5,9.2]   | 5.4                    | [3.9,7.5]  |
| Married                                               | 14217              | 74.3        | [73.6,75.0] | 14.2         | [13.0,15.6] | 4.1           | [3.5,4.8]  | 5.7                  | [5.0,6.5]  | 14                  | [12.6,15.4] | 7.8                    | [7.1,8.6]  |

|    |  |                                             |       |      |             |      |             |      |             |      |             |      |             |      |             |
|----|--|---------------------------------------------|-------|------|-------------|------|-------------|------|-------------|------|-------------|------|-------------|------|-------------|
| 1  |  |                                             |       |      |             |      |             |      |             |      |             |      |             |      |             |
| 2  |  |                                             |       |      |             |      |             |      |             |      |             |      |             |      |             |
| 3  |  |                                             |       |      |             |      |             |      |             |      |             |      |             |      |             |
| 4  |  |                                             |       |      |             |      |             |      |             |      |             |      |             |      |             |
| 5  |  | Widowed                                     | 838   | 67.4 | [66.1,68.7] | 34.5 | [30.5,38.8] | 10.2 | [8.0,12.9]  | 18.7 | [15.8,22.1] | 32.7 | [29.3,36.2] | 18.2 | [15.4,21.3] |
| 6  |  | Separated/Divorced                          | 55    | 65.3 | [57.9,72.7] | 24.6 | [11.8,44.3] | 10.2 | [4.6,21.3]  | 20.6 | [8.8,41.0]  | 22.3 | [12.2,37.2] | 25.1 | [14.9,39.2] |
| 7  |  |                                             |       |      |             |      |             |      |             |      |             |      |             |      |             |
| 8  |  | <b>BMI (Kg/m<sup>2</sup>)</b>               |       |      |             |      |             |      |             |      |             |      |             |      |             |
| 9  |  | underweight (<18)                           | 756   | 74.0 | [72.3,75.7] | 14.9 | [11.7,18.8] | 3.0  | [1.7,5.3]   | 5.4  | [3.7,7.9]   | 12.9 | [10.1,16.5] | 9.0  | [6.3,12.7]  |
| 10 |  | Normal (18-24.9)                            | 5278  | 75.1 | [74.3,75.9] | 11.8 | [10.4,13.3] | 3.5  | [2.8,4.2]   | 4.8  | [4.0,5.7]   | 11.5 | [10.2,13.0] | 7.5  | [6.6,8.7]   |
| 11 |  | Overweight (25.0-29.9)                      | 4190  | 73.6 | [72.7,74.5] | 15.2 | [13.4,17.2] | 4.8  | [3.8,6.0]   | 6.2  | [5.2,7.3]   | 14.4 | [12.6,16.4] | 8.2  | [7.2,9.4]   |
| 12 |  | Obesity (≥30)                               | 2249  | 70.4 | [69.5,71.2] | 22.3 | [19.9,24.9] | 6.4  | [5.1,8.0]   | 9.1  | [7.6,10.9]  | 20.7 | [18.2,23.6] | 10   | [8.5,11.8]  |
| 13 |  |                                             |       |      |             |      |             |      |             |      |             |      |             |      |             |
| 14 |  | <b>Tobacco use (Smoke/Chew/other forms)</b> |       |      |             |      |             |      |             |      |             |      |             |      |             |
| 15 |  | Never user                                  | 12215 | 74.1 | [73.4,74.8] | 15.4 | [14.0,16.8] | 4.5  | [3.8,5.3]   | 6.4  | [5.6,7.2]   | 14.6 | [13.1,16.2] | 8.1  | [7.3,9.0]   |
| 16 |  | Current user                                | 3758  | 75.3 | [74.3,76.3] | 11.8 | [10.4,13.4] | 3.1  | [2.4,4.1]   | 4.6  | [3.8,5.6]   | 12.9 | [11.6,14.5] | 7.9  | [6.7,9.2]   |
| 17 |  | Former user                                 | 314   | 70.1 | [67.0,73.2] | 17.6 | [13.4,22.8] | 4.7  | [2.7,8.1]   | 8.3  | [5.6,12.3]  | 18.1 | [13.6,23.7] | 12.4 | [8.8,17.2]  |
| 18 |  |                                             |       |      |             |      |             |      |             |      |             |      |             |      |             |
| 19 |  | <b>Chronic conditions (self-reported)</b>   |       |      |             |      |             |      |             |      |             |      |             |      |             |
| 20 |  | No                                          | 12498 | 76.2 | [75.4,76.9] | 11.9 | [10.7,13.1] | 3.5  | [2.8,4.2]   | 4.5  | [3.9,5.2]   | 11.2 | [10.1,12.5] | 6.8  | [6.0,7.6]   |
| 21 |  | Yes                                         | 4699  | 67.3 | [66.6,68.1] | 24.6 | [22.4,27.0] | 6.9  | [5.9,7.9]   | 11.8 | [10.5,13.2] | 25.5 | [23.3,27.9] | 13.2 | [12.0,14.5] |
| 22 |  |                                             |       |      |             |      |             |      |             |      |             |      |             |      |             |
| 23 |  | <b>Diabetes</b>                             |       |      |             |      |             |      |             |      |             |      |             |      |             |
| 24 |  | No diabetes                                 | 4610  | 75.1 | [74.4,75.9] | 10.1 | [8.9,11.4]  | 3.3  | [2.6,4.1]   | 4.2  | [3.5,5.0]   | 10.3 | [8.8,12.0]  | 7.5  | [6.5,8.6]   |
| 25 |  | Pre-diabetes                                | 5449  | 74.4 | [73.5,75.3] | 15.5 | [13.6,17.5] | 4.2  | [3.3,5.2]   | 6.0  | [5.0,7.2]   | 14.6 | [12.9,16.4] | 8.0  | [7.0,9.1]   |
| 26 |  | Newly diagnosed                             | 2015  | 74.3 | [73.3,75.3] | 17.2 | [14.7,20.1] | 5.0  | [3.8,6.5]   | 8.1  | [6.5,10.0]  | 17.2 | [15.0,19.6] | 8.5  | [7.1,10.1]  |
| 27 |  | Self-reported Diabetes                      | 1661  | 65.9 | [64.8,67.1] | 20.9 | [18.9,23.1] | 6.3  | [5.2,7.5]   | 9.5  | [8.3,11.0]  | 19.8 | [18.1,21.7] | 10.5 | [9.3,11.8]  |
| 28 |  |                                             |       |      |             |      |             |      |             |      |             |      |             |      |             |
| 29 |  | <b>Hypertension</b>                         |       |      |             |      |             |      |             |      |             |      |             |      |             |
| 30 |  | Normotension                                | 5695  | 74.8 | [74.0,75.5] | 12.8 | [11.4,14.3] | 3.8  | [3.0,4.9]   | 4.7  | [3.9,5.6]   | 11.6 | [9.9,13.6]  | 6.9  | [6.0,8.0]   |
| 31 |  | Prehypertension                             | 4717  | 76.0 | [75.0,76.9] | 12.7 | [11.2,14.4] | 3.7  | [2.9,4.6]   | 5.1  | [4.3,6.0]   | 12.3 | [11.0,13.8] | 6.5  | [5.6,7.5]   |
| 32 |  | Newly diagnosed                             | 2780  | 75.8 | [74.8,76.8] | 12.9 | [11.0,15.1] | 3.0  | [2.4,3.8]   | 5.1  | [4.2,6.3]   | 12.6 | [11.0,14.3] | 8.4  | [7.2,9.9]   |
| 33 |  | Self-reported                               | 2397  | 66.7 | [65.8,67.7] | 18.8 | [16.8,21.0] | 4.9  | [4.2,5.7]   | 8.7  | [7.6,9.9]   | 19.6 | [17.8,21.4] | 10.8 | [9.7,12.0]  |
| 34 |  |                                             |       |      |             |      |             |      |             |      |             |      |             |      |             |
| 35 |  | <b>Heart Disease</b>                        |       |      |             |      |             |      |             |      |             |      |             |      |             |
| 36 |  | No                                          | 15842 | 74.6 | [73.9,75.2] | 14.2 | [12.9,15.5] | 4.0  | [3.4,4.7]   | 5.6  | [5.0,6.4]   | 13.8 | [12.6,15.2] | 7.9  | [7.2,8.6]   |
| 37 |  | Yes                                         | 445   | 63.3 | [61.3,65.2] | 31.2 | [25.7,37.3] | 11.7 | [8.3,16.2]  | 20.8 | [16.7,25.7] | 31.4 | [26.5,36.7] | 19.0 | [15.0,23.8] |
| 38 |  |                                             |       |      |             |      |             |      |             |      |             |      |             |      |             |
| 39 |  | <b>Stroke</b>                               |       |      |             |      |             |      |             |      |             |      |             |      |             |
| 40 |  | No                                          | 16203 | 74.3 | [73.6,75.1] | 14.5 | [13.3,15.8] | 4.1  | [3.5,4.8]   | 6.0  | [5.3,6.7]   | 14.1 | [12.9,15.5] | 8.1  | [7.4,8.8]   |
| 41 |  | Yes                                         | 84    | 62.4 | [58.5,66.2] | 31.9 | [22.0,43.7] | 16.8 | [10.0,26.7] | 18.1 | [11.1,28.1] | 43.3 | [32.3,55.1] | 21.2 | [13.2,32.2] |
| 42 |  |                                             |       |      |             |      |             |      |             |      |             |      |             |      |             |
| 43 |  |                                             |       |      |             |      |             |      |             |      |             |      |             |      |             |
| 44 |  |                                             |       |      |             |      |             |      |             |      |             |      |             |      |             |
| 45 |  |                                             |       |      |             |      |             |      |             |      |             |      |             |      |             |
| 46 |  |                                             |       |      |             |      |             |      |             |      |             |      |             |      |             |
| 47 |  |                                             |       |      |             |      |             |      |             |      |             |      |             |      |             |
| 48 |  |                                             |       |      |             |      |             |      |             |      |             |      |             |      |             |
| 49 |  |                                             |       |      |             |      |             |      |             |      |             |      |             |      |             |

**Kidney disease**

|     |       |      |             |      |             |     |            |      |            |      |             |      |             |
|-----|-------|------|-------------|------|-------------|-----|------------|------|------------|------|-------------|------|-------------|
| No  | 16175 | 74.4 | [73.7,75.1] | 14.6 | [13.3,15.9] | 4.1 | [3.6,4.8]  | 6.0  | [5.3,6.7]  | 14.1 | [12.9,15.5] | 8.1  | [7.3,8.8]   |
| Yes | 112   | 62.5 | [59.4,65.7] | 19.2 | [13.1,27.2] | 10  | [5.7,17.0] | 15.1 | [9.9,22.3] | 31.4 | [23.5,40.6] | 20.7 | [14.1,29.3] |

**NOTES:** Tobacco use, Heart disease, Kidney disease were based on self-reports, newly diagnosed diabetes - defined as no self-reported diabetes and fasting blood glucose (FBG) of  $\geq 126$  mg/dl, or HbA1c  $\geq 6.5\%$ , pre-diabetes – no self-reported diabetes and FBG  $\geq 100$ -125 mg/dl or HbA1c  $\geq 5.7$ -6.4%), normoglycemia –no self-reported diabetes and FBG $<100$  mg/dl and HbA1c $<5.7\%$ , Newly diagnosed hypertension – defined as no self-reported hypertension and BP  $\geq 140/90$ mmHg, prehypertension - no self-reported hypertension and BP: 120-139 / 80-89 mmHg and normotensive - no history of hypertension and BP  $<120/80$  mmHg.

**Abbreviations:** INR: Indian rupees, mmHg – millimetre of mercury, mg/dl - Milligram/decilitre; US\$ - United States Dollar, CI – Confidence Interval

Table 3: Adjusted prevalence ratio of reporting any problems in individuals with chronic conditions versus those without chronic conditions, by cities and gender

|                            | Mobility |             | Self-care |              | Usual activities |             | Pain/discomfort |             | Anxiety/depression |             | Any Dimension |             |
|----------------------------|----------|-------------|-----------|--------------|------------------|-------------|-----------------|-------------|--------------------|-------------|---------------|-------------|
|                            | PR       | 95%CI       | PR        | 95%CI        | PR               | 95%CI       | PR              | 95%CI       | PR                 | 95%CI       | PR            | 95%CI       |
| <b>Overall<sup>§</sup></b> | 1.41     | [1.27,1.57] | 1.35      | [1.09,1.67]  | 1.70             | [1.45,2.01] | 1.74            | [1.58,1.91] | 1.60               | [1.40,1.84] | 1.45          | [1.35,1.56] |
| Males <sup>^</sup>         | 1.78     | [1.46,2.18] | 1.60      | [1.10,2.34]  | 2.01             | [1.41,2.87] | 1.89            | [1.62,2.23] | 2.01               | [1.55,2.62] | 1.63          | [1.41,1.88] |
| Females <sup>^</sup>       | 1.32     | [1.16,1.50] | 1.28      | [0.99,1.66]  | 1.67             | [1.40,1.99] | 1.72            | [1.53,1.93] | 1.44               | [1.23,1.69] | 1.39          | [1.29,1.52] |
| <b>Chennai<sup>*</sup></b> | 1.24     | [1.05,1.46] | 1.08      | [0.84,1.40]  | 1.31             | [1.07,1.60] | 1.71            | [1.45,2.04] | 1.56               | [1.31,1.86] | 1.30          | [1.17,1.44] |
| Males <sup>^</sup>         | 1.46     | [1.07,1.99] | 1.12      | [0.71,1.76]  | 1.24             | [0.80,1.90] | 1.73            | [1.34,2.24] | 1.75               | [1.34,2.30] | 1.38          | [1.16,1.66] |
| Females <sup>^</sup>       | 1.18     | [0.97,1.44] | 1.08      | [0.79,1.47]  | 1.38             | [1.11,1.73] | 1.73            | [1.38,2.17] | 1.46               | [1.16,1.83] | 1.27          | [1.12,1.45] |
| <b>Delhi<sup>*</sup></b>   | 1.66     | [1.41,1.95] | 3.05      | [1.78, 5.25] | 2.40             | [1.66,3.47] | 1.79            | [1.54,2.08] | 1.84               | [1.29,2.63] | 1.65          | [1.47,1.86] |
| Males <sup>^</sup>         | 2.13     | [1.52,2.97] | 5.14      | [1.92,13.78] | 3.63             | [1.61,8.17] | 1.93            | [1.50,2.49] | 3.45               | [1.36,8.80] | 1.89          | [1.45,2.48] |
| Females <sup>^</sup>       | 1.58     | [1.31,1.90] | 2.23      | [1.27,3.94]  | 2.15             | [2.15,2.15] | 1.82            | [1.51,2.18] | 1.56               | [1.12,2.18] | 1.62          | [1.43,1.83] |
| <b>Karachi<sup>*</sup></b> | 1.41     | [1.15,1.72] | 1.77      | [1.05,3.00]  | 2.09             | [1.58,2.77] | 1.64            | [1.37,1.97] | 1.60               | [1.21,2.11] | 1.43          | [1.25,1.65] |
| Males <sup>^</sup>         | 2.51     | [1.52,4.13] | 1.76      | [0.77,4.02]  | 2.91             | [1.62,5.22] | 2.28            | [1.52,3.42] | 2.04               | [1.27,3.29] | 2.01          | [1.44,2.80] |
| Females <sup>^</sup>       | 1.24     | [1.01,1.53] | 2.11      | [1.10,4.04]  | 1.95             | [1.44,2.65] | 1.50            | [1.24,1.81] | 1.32               | [0.94,1.87] | 1.27          | [1.10,1.47] |

NOTES: Prevalence ratio (PR) were estimated using Poisson regression model as the log binomial regression model did not reach convergence.

<sup>§</sup>adjusted for age, sex, income, education, marital status and city

<sup>\*</sup>adjusted for age, sex, income, education, and marital status

<sup>^</sup>adjusted for age, income, education, marital status and city

Abbreviations: CI – Confidence interval, PR – Prevalence ratio,



## References

1. Rabin R, de Charro F. EQ-5D: a measure of health status from the EuroQol Group. *Ann Med*. 2001;33(5):337-43.
2. Barker AE. Clinical Lecture on Permanent Subcutaneous Suture of the Patella for Recent Fracture: Delivered at University College Hospital. *Br Med J*. 1892;1(1626):425-8.
3. Kaplan RM, Anderson JP. A general health policy model: update and applications. *Health Serv Res*. 1988;23(2):203-35.
4. Coons SJ, Rao S, Keininger DL, Hays RD. A comparative review of generic quality-of-life instruments. *Pharmacoeconomics*. 2000;17(1):13-35.
5. Prabhakaran D, Jeemon P, Roy A. Cardiovascular Diseases in India: Current Epidemiology and Future Directions. *Circulation*. 2016;133(16):1605-20.
6. Fortin M, Lapointe L, Hudon C, Vanasse A, Ntetu AL, Maltais D. Multimorbidity and quality of life in primary care: a systematic review. *Health Qual Life Outcomes*. 2004;2:51.
7. Alonso J, Ferrer M, Gandek B, Ware JE, Jr., Aaronson NK, Mosconi P, et al. Health-related quality of life associated with chronic conditions in eight countries: results from the International Quality of Life Assessment (IQOLA) Project. *Qual Life Res*. 2004;13(2):283-98.
8. Schultz SE, Kopec JA. Impact of chronic conditions. *Health Rep*. 2003;14(4):41-53.
9. Patrick DL, Deyo RA. Generic and disease-specific measures in assessing health status and quality of life. *Med Care*. 1989;27(3 Suppl):S217-32.
10. Horsman J, Furlong W, Feeny D, Torrance G. The Health Utilities Index (HUI): concepts, measurement properties and applications. *Health Qual Life Outcomes*. 2003;1:54.
11. Furlong WJ, Feeny DH, Torrance GW, Barr RD. The Health Utilities Index (HUI) system for assessing health-related quality of life in clinical studies. *Ann Med*. 2001;33(5):375-84.
12. Brazier J, Roberts J, Deverill M. The estimation of a preference-based measure of health from the SF-36. *J Health Econ*. 2002;21(2):271-92.
13. McHorney CA. Health status assessment methods for adults: past accomplishments and future challenges. *Annu Rev Public Health*. 1999;20:309-35.
14. The World Health Organization Quality of Life Assessment (WHOQOL): development and general psychometric properties. *Soc Sci Med*. 1998;46(12):1569-85.
15. The World Health Organization Quality of Life assessment (WHOQOL): position paper from the World Health Organization. *Soc Sci Med*. 1995;41(10):1403-9.
16. Study protocol for the World Health Organization project to develop a Quality of Life assessment instrument (WHOQOL). *Qual Life Res*. 1993;2(2):153-9.
17. Centers for Disease Control and Prevention. Measuring healthy days: Population assessment of health-related quality of life. Centers for Disease Control and Prevention, Atlanta, Georgia 2000.
18. Gandek B, Sinclair SJ, Kosinski M, Ware JE, Jr. Psychometric evaluation of the SF-36 health survey in Medicare managed care. *Health Care Financ Rev*. 2004;25(4):5-25.
19. Nair M, Ali MK, Ajay VS, Shivashankar R, Mohan V, Pradeepa R, et al. CARRS Surveillance study: design and methods to assess burdens from multiple perspectives. *BMC Public Health*. 2012;12:701.
20. ISPOR 2nd Latin America Conference. Abstracts. *Value Health*. 2009;12(7):A483-534.
21. Patel SA, Shivashankar R, Ali MK, Anjana RM, Deepa M, Kapoor D, et al. Is the "South Asian Phenotype" Unique to South Asians?: Comparing Cardiometabolic Risk Factors in the CARRS and NHANES Studies. *Glob Heart*. 2016;11(1):89-96 e3.
22. Deepa M, Grace M, Binukumar B, Pradeepa R, Roopa S, Khan HM, et al. High burden of prediabetes and diabetes in three large cities in South Asia: The Center for cArdio-metabolic Risk Reduction in South Asia (CARRS) Study. *Diabetes Res Clin Pract*. 2015;110(2):172-82.
23. Berg CJ, Ajay VS, Ali MK, Kondal D, Khan HM, Shivashankar R, et al. A cross-sectional study of the prevalence and correlates of tobacco use in Chennai, Delhi, and Karachi: data from the CARRS study. *BMC Public Health*. 2015;15:483.
24. Ali MK, Bhaskarapillai B, Shivashankar R, Mohan D, Fatmi ZA, Pradeepa R, et al. Socioeconomic status and cardiovascular risk in urban South Asia: The CARRS Study. *Eur J Prev Cardiol*. 2016;23(4):408-19.

- 1
  - 2
  - 3
  - 4
  - 5
  - 6
  - 7
  - 8
  - 9
  - 10
  - 11
  - 12
  - 13
  - 14
  - 15
  - 16
  - 17
  - 18
  - 19
  - 20
  - 21
  - 22
  - 23
  - 24
  - 25
  - 26
  - 27
  - 28
  - 29
  - 30
  - 31
  - 32
  - 33
  - 34
  - 35
  - 36
  - 37
  - 38
  - 39
  - 40
  - 41
  - 42
  - 43
  - 44
  - 45
  - 46
  - 47
  - 48
  - 49
  - 50
  - 51
  - 52
  - 53
  - 54
  - 55
  - 56
  - 57
  - 58
  - 59
  - 60
25. Kind P, Dolan P, Gudex C, Williams A. Variations in population health status: results from a United Kingdom national questionnaire survey. *BMJ*. 1998;316(7133):736-41.
26. Sun H, Zhang Q, Luo X, Quan H, Zhang F, Liu C, et al. Changes of adult population health status in China from 2003 to 2008. *PLoS One*. 2011;6(12):e28411.
27. Sun S, Chen J, Johannesson M, Kind P, Xu L, Zhang Y, et al. Regional differences in health status in China: population health-related quality of life results from the National Health Services Survey 2008. *Health Place*. 2011;17(2):671-80.
28. Sun S, Chen J, Johannesson M, Kind P, Xu L, Zhang Y, et al. Population health status in China: EQ-5D results, by age, sex and socio-economic status, from the National Health Services Survey 2008. *Qual Life Res*. 2011;20(3):309-20.
29. Measuring Self-Reported Population Health: An International Perspective based on EQ-5D. In: Szende A, Williams, A., ed. On behalf of: The EuroQol Group's International Task Force on Self-Reported Health; 2004.
30. Sayed BA, French MT. To your health!: Re-examining the health benefits of moderate alcohol use. *Soc Sci Med*. 2016;167:20-8.
31. Mauro PM, Canham SL, Martins SS, Spira AP. Substance-use coping and self-rated health among US middle-aged and older adults. *Addict Behav*. 2015;42:96-100.
32. Badia X, Herdman M, Kind P. The influence of ill-health experience on the valuation of health. *Pharmacoeconomics*. 1998;13(6):687-96.
33. Sullivan PW, Ghushchyan V. Preference-Based EQ-5D index scores for chronic conditions in the United States. *Med Decis Making*. 2006;26(4):410-20.
34. Ko Y, Coons SJ. Self-reported chronic conditions and EQ-5D index scores in the US adult population. *Curr Med Res Opin*. 2006;22(10):2065-71.
35. Sakthong P, Sonsa-Ardjit N, Sukarnjanaset P, Munpan W. Psychometric properties of the EQ-5D-5L in Thai patients with chronic diseases. *Qual Life Res*. 2015;24(12):3015-22.
36. Tan Z, Liang Y, Liu S, Cao W, Tu H, Guo L, et al. Health-related quality of life as measured with EQ-5D among populations with and without specific chronic conditions: a population-based survey in Shaanxi Province, China. *PLoS One*. 2013;8(7):e65958.
37. McPherson K, Myers J, Taylor WJ, McNaughton HK, Weatherall M. Self-valuation and societal valuations of health state differ with disease severity in chronic and disabling conditions. *Med Care*. 2004;42(11):1143-51.
38. Lam JM, Wodchis WP. The relationship of 60 disease diagnoses and 15 conditions to preference-based health-related quality of life in Ontario hospital-based long-term care residents. *Med Care*. 2010;48(4):380-7.
39. Hutchinson AF, Graco M, Rasekaba TM, Parikh S, Berlowitz DJ, Lim WK. Relationship between health-related quality of life, comorbidities and acute health care utilisation, in adults with chronic conditions. *Health Qual Life Outcomes*. 2015;13:69.
40. Hevey D, McGee HM, Horgan J. Relationship of initial level of distress to changes in health-related quality of life during cardiac rehabilitation or usual care. *Psychosom Med*. 2007;69(8):793-7.
41. Arnlinde MH, Nokela M, Rehnberg C, Jonsson EW. The relationship between pharmaceutical costs, disease severity, and health-related quality of life in asthmatics in Swedish primary care. *J Asthma*. 2006;43(8):585-91.
42. Mo F, Choi BC, Li FC, Merrick J. Using Health Utility Index (HUI) for measuring the impact on health-related quality of Life (HRQL) among individuals with chronic diseases. *ScientificWorldJournal*. 2004;4:746-57.
43. Lubetkin EI, Jia H, Franks P, Gold MR. Relationship among sociodemographic factors, clinical conditions, and health-related quality of life: examining the EQ-5D in the U.S. general population. *Qual Life Res*. 2005;14(10):2187-96.
44. Jia H, Lubetkin EI. The impact of obesity on health-related quality-of-life in the general adult US population. *J Public Health (Oxf)*. 2005;27(2):156-64.
45. Wu SC, Li CY, Ke DS. The agreement between self-reporting and clinical diagnosis for selected medical conditions among the elderly in Taiwan. *Public Health*. 2000;114(2):137-42.

- 1 46. Molenaar EA, Van Ameijden EJ, Grobbee DE, Numans ME. Comparison of routine care self-reported  
2 and biometrical data on hypertension and diabetes: results of the Utrecht Health Project. *Eur J Public*  
3 *Health*. 2007;17(2):199-205.
- 4 47. Robinson JR, Young TK, Roos LL, Gelskey DE. Estimating the burden of disease. Comparing  
5 administrative data and self-reports. *Med Care*. 1997;35(9):932-47.
- 6 48. Okura Y, Urban LH, Mahoney DW, Jacobsen SJ, Rodeheffer RJ. Agreement between self-report  
7 questionnaires and medical record data was substantial for diabetes, hypertension, myocardial  
8 infarction and stroke but not for heart failure. *J Clin Epidemiol*. 2004;57(10):1096-103.
- 9 49. Chen J, Wong, C.K.H., McGhee,S.M., Pang,P.K.P., Yu, W.C. A Comparison between the EQ-5D and the  
10 SF-6D in Patients with Chronic Obstructive Pulmonary Disease (COPD). *PLoS One*. 2014;9(11).
- 11 50. Salaffi F, Carotti M, Ciapetti A, Gasparini S, Grassi W. A comparison of utility measurement using EQ-  
12 5D and SF-6D preference-based generic instruments in patients with rheumatoid arthritis. *Clin Exp*  
13 *Rheumatol*. 2011;29(4):661-71.
- 14 51. Wu J, Han Y, Zhao FL, Zhou J, Chen Z, Sun H. Validation and comparison of EuroQoL-5 dimension (EQ-  
15 5D) and Short Form-6 dimension (SF-6D) among stable angina patients. *Health Qual Life Outcomes*.  
16 2014;12:156.
- 17 52. Petrou S, Hockley C. An investigation into the empirical validity of the EQ-5D and SF-6D based on  
18 hypothetical preferences in a general population. *Health Econ*. 2005;14(11):1169-89.
- 19 53. Obradovic M, Lal A, Liedgens H. Validity and responsiveness of EuroQol-5 dimension (EQ-5D) versus  
20 Short Form-6 dimension (SF-6D) questionnaire in chronic pain. *Health Qual Life Outcomes*.  
21 2013;11:110.
- 22 54. Kuspinar A, Mayo NE. A review of the psychometric properties of generic utility measures in multiple  
23 sclerosis. *Pharmacoeconomics*. 2014;32(8):759-73.
- 24 55. Rothberg AE, McEwen LN, Kraftson AT, Neshewat GM, Fowler CE, Burant CF, et al. The impact of  
25 weight loss on health-related quality-of-life: implications for cost-effectiveness analyses. *Qual Life*  
26 *Res*. 2014;23(4):1371-6.
- 27 56. Kindig DA BB, Remington PL. Mobilizing Action Toward Community Health (MATCH): metrics,  
28 incentives, and partnerships for population health. *Prev Chronic Dis*. 2010;7(5).
- 29 57. Hennessy CH, Moriarty DG, Zack MM, Scherr PA, Brackbill R. Measuring health-related quality of life  
30 for public health surveillance. *Public Health Rep*. 1994;109(5):665-72.
- 31 58. Dominick KL, Ahern FM, Gold CH, Heller DA. Relationship of health-related quality of life to health  
32 care utilization and mortality among older adults. *Aging Clin Exp Res*. 2002;14(6):499-508.
- 33 59. Prazeres F, Santiago L. Relationship between health-related quality of life, perceived family support  
34 and unmet health needs in adult patients with multimorbidity attending primary care in Portugal: a  
35 multicentre cross-sectional study. *Health Qual Life Outcomes*. 2016;14(1):156.
- 36 60. Polat U, Bayrak Kahraman B, Kaynak I, Gorgulu U. Relationship among health-related quality of life,  
37 depression and awareness of home care services in elderly patients. *Geriatr Gerontol Int*.  
38 2016;16(11):1211-9.
- 39 61. Lim JW, Paek MS. The relationship between communication and health-related quality of life in  
40 survivorship care for Chinese-American and Korean-American breast cancer survivors. *Support Care*  
41 *Cancer*. 2013;21(4):1157-66.
- 42 62. Jia H, Lubetkin EI. Time trends and seasonal patterns of health-related quality of life among U.S.  
43 adults. *Public Health Rep*. 2009;124(5):692-701.
- 44 63. Ford ES, Mokdad AH, Li C, McGuire LC, Strine TW, Okoro CA, et al. Gender differences in coronary  
45 heart disease and health-related quality of life: findings from 10 states from the 2004 behavioral risk  
46 factor surveillance system. *J Womens Health (Larchmt)*. 2008;17(5):757-68.
- 47 64. Zahran HS, Kobau R, Moriarty DG, Zack MM, Holt J, Donehoo R. Health-related quality of life  
48 surveillance--United States, 1993-2002. *MMWR Surveill Summ*. 2005;54(4):1-35.
- 49  
50  
51  
52  
53  
54  
55  
56  
57  
58  
59  
60

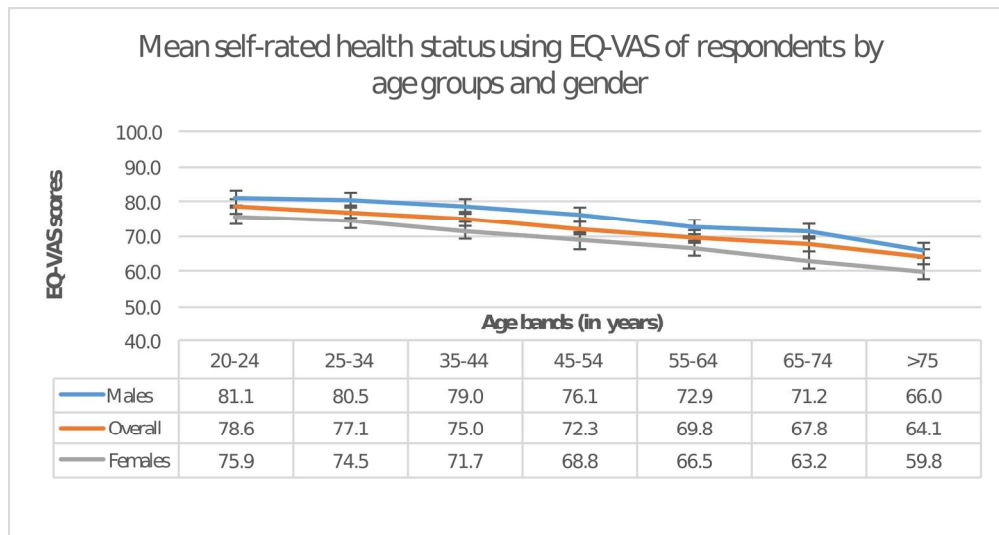

Figure 1 - Mean self-rated health status using EQ5D-VAS of respondents by age groups and gender

Figure Legend: This figure presents the mean self-rated health status for overall study population by age-groups and gender. European Quality of Life 5 Dimension - Visual Analogue Scale (EQ5D-VAS) measures health status on a scale of 0 (worst health status) – 100 (best imaginable health status)

\* P-value for difference between mean EQ5D-VAS between males and females at each age-group is statistically significant;  $p < 0.01$ .

88x47mm (600 x 600 DPI)

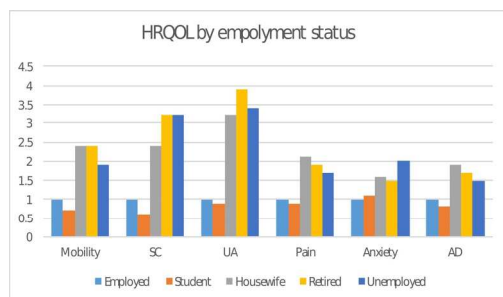

Figure 2.a

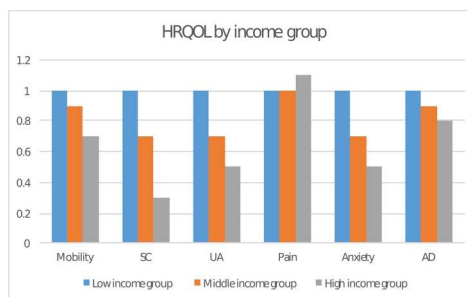

Figure 2.b

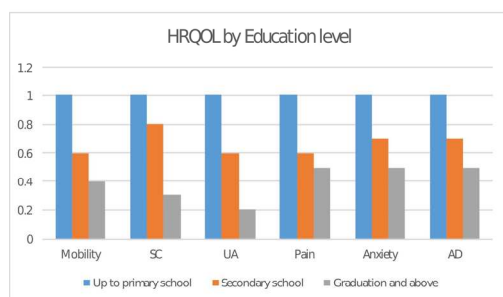

Figure 2.c

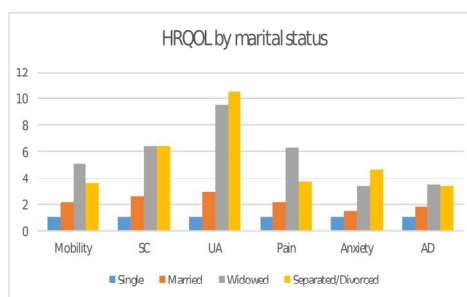

Figure 2.d

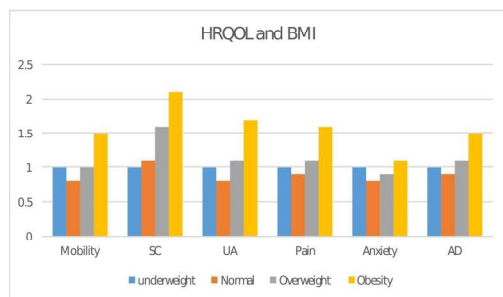

Figure 2.e

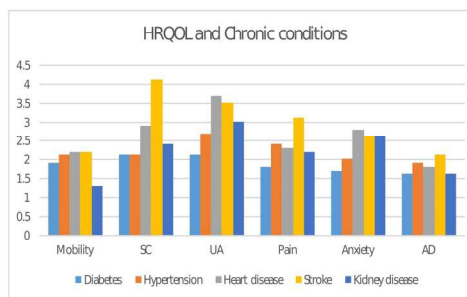

Figure 2.f

Figure 2 – Prevalence ratio of moderate or severe health problems by socio-demographic factors and chronic conditions

Figure 2.a. shows the prevalence ratio of moderate or severe difficulties in EQ5D domains (mobility, self-care, usual activities, pain/discomfort, anxiety/depression and any of the five dimensions) by employment status. With reference to those who were employed (PR=1), housewife, retired, and unemployed reported greater problems in all five domains. Whereas, students only reported higher anxiety problems compared to employed.

Figure 2.b. shows the prevalence ratio of moderate or severe difficulties in EQ5D domains by income-group. With reference to low-income group (PR=1), those in middle- or high- income groups had less problems in all five domains.

Figure 2.c. shows the prevalence ratio of moderate or severe difficulties in EQ5D domains by education level. With reference to those primary school education (PR=1), individuals with secondary school or graduates reported significantly lower problems in all five domains.

Figure 2.d. shows the prevalence ratio of moderate or severe difficulties in EQ5D domains by marital status. With reference to single (PR=1), those who were married, widower, or divorcee had greater problems in all five domains.

Figure 2.e. shows the prevalence ratio of moderate or severe difficulties in EQ5D domains by body mass index (BMI). With reference to underweight i.e. BMI <18Kg/m<sup>2</sup> (PR=1), individuals with overweight (BMI 25-29.9 Kg/m<sup>2</sup>) or obesity (BMI ≥30Kg/m<sup>2</sup>) reported significantly greater problems in all five domains.

1  
2  
3  
4  
5  
6  
7  
8  
9  
10  
11  
12  
13  
14  
15  
16  
17  
18  
19  
20  
21  
22  
23  
24  
25  
26  
27  
28  
29  
30  
31  
32  
33  
34  
35  
36  
37  
38  
39  
40  
41  
42  
43  
44  
45  
46  
47  
48  
49  
50  
51  
52  
53  
54  
55  
56  
57  
58  
59  
60

Figure 2.f. shows the prevalence ratio of moderate or severe difficulties in EQ5D domains by chronic conditions. Compared to those without chronic conditions, individuals with self-reported diabetes, hypertension, heart disease, stroke and kidney disease had twice greater problems in all five domains. Abbreviations: AD – Any Dimension, HRQOL – Health-related quality of life, SC – Self-Care, UA – Usual Activities; PR – Prevalence Ratio, EQ5D – European Quality of Life 5 dimension

181x189mm (300 x 300 DPI)

For peer review only

1  
2  
3  
4  
5  
6  
7  
8  
9  
10  
11  
12  
13  
14  
15  
16  
17  
18  
19  
20  
21  
22  
23  
24  
25  
26  
27  
28  
29  
30  
31  
32  
33  
34  
35  
36  
37  
38  
39  
40  
41  
42  
43  
44  
45  
46  
47  
48  
49  
50  
51  
52  
53  
54  
55  
56  
57  
58  
59  
60

## Web-appendix (supplementary file)

### Appendix 1: The distribution of the respondents EQ-VAS values

| EQ-VAS score | Number | Percentage (%) | Cum. Percentage (%) |
|--------------|--------|----------------|---------------------|
| 10-          | 29     | 0.18           | 0.18                |
| 20-          | 72     | 0.44           | 0.62                |
| 30-          | 88     | 0.54           | 1.16                |
| 40-          | 365    | 2.24           | 3.4                 |
| 50-          | 2,056  | 12.62          | 16.03               |
| 60-          | 1,979  | 12.15          | 28.18               |
| 70-          | 3,728  | 22.89          | 51.07               |
| 80-          | 4,026  | 24.72          | 75.78               |
| 90-          | 2,594  | 15.93          | 91.71               |
| 100-         | 1,350  | 8.29           | 100                 |

Notes: EQ-VAS: European Quality of Life – Visual Analogue Scale, Cum. Percentage – Cumulative percentage

## Appendix 2: Relationship between EQ-VAS and EQ5D across major sub-groups

| Dependent variable                                           | Mobility    | Self-care   | Usual care  | Pain / discomfort | Anxiety / Depression | Observation |
|--------------------------------------------------------------|-------------|-------------|-------------|-------------------|----------------------|-------------|
| Overall                                                      | -10.5 (0.6) | -9.9 (0.9)  | -12.4 (0.7) | -10.9 (0.6)       | -8.9 (0.8)           | 16287       |
| Gender                                                       |             |             |             |                   |                      |             |
| <b>Male</b>                                                  | -12.0 (0.6) | -11.4 (1.1) | -14.6 (0.9) | -11.9 (0.6)       | -12.1 (0.7)          | 7760        |
| <b>Female</b>                                                | -8.1 (0.4)  | -7.9 (0.7)  | -9.9 (0.6)  | -7.7 (0.4)        | -9.1 (0.5)           | 8527        |
| Age groups                                                   |             |             |             |                   |                      |             |
| <b>Young (20-44 yrs)</b>                                     | -9.9 (0.5)  | -11.0 (0.9) | -12.0 (0.8) | -8.8 (0.5)        | -9.3 (0.6)           | 9603        |
| <b>Middle (45-60 yrs)</b>                                    | -9.0 (0.5)  | -10.8 (0.9) | -11.3 (0.8) | -9.0 (0.5)        | -10.7 (0.6)          | 5544        |
| <b>Elderly (&gt;60 yrs)</b>                                  | -11.1 (1.0) | -11.7 (1.6) | -13.1 (1.3) | -11.0 (1.1)       | -13.2 (1.4)          | 1140        |
| Income                                                       |             |             |             |                   |                      |             |
| <b>Low income group (INR &lt;10000 or US\$ 155)</b>          | -10.6 (0.4) | -12.1 (0.7) | -13.2 (0.6) | -10.2 (0.4)       | -10.7 (0.5)          | 11537       |
| <b>Middle income group (INR 10000-20000 or US\$ 155-310)</b> | -10.2 (0.8) | -8.9 (1.6)  | -10.7 (1.3) | -9.2 (0.8)        | -11.8 (1.1)          | 2667        |
| <b>High income group (INR &gt;20000 or US\$ &gt;310)</b>     | -12 (1.0)   | -14.4(2.5)  | -15.6 (1.7) | -10.5 (0.9)       | -8.2 (1.6)           | 1975        |
| Level of education                                           |             |             |             |                   |                      |             |
| <b>Up to primary school</b>                                  | -10.8 (0.6) | -12.8 (1.1) | -12.6 (0.8) | -9.9 (0.6)        | -11.6 (0.8)          | 3604        |
| <b>Secondary school</b>                                      | -9.9 (0.4)  | -11.1 (0.8) | -12.2 (0.7) | -9.3 (0.4)        | -10.2 (0.5)          | 9924        |
| <b>Graduation and above</b>                                  | -8.9 (1.0)  | -8.3 (2.1)  | -11.4 (1.8) | -9.8 (0.9)        | -8.3 (1.3)           | 2759        |
| Marital status                                               |             |             |             |                   |                      |             |
| <b>Single</b>                                                | -8.4 (1.9)  | -9.4 (3.8)  | -15.2 (3.3) | -9.0 (1.8)        | -10.8 (2.0)          | 1177        |
| <b>Married</b>                                               | -10.3 (0.4) | -11.5 (0.6) | -12.3 (0.5) | -9.5 (0.4)        | -10.3 (0.5)          | 14217       |
| <b>Widowed</b>                                               | -9.9 (1.2)  | -11.1 (1.8) | -12.9 (1.4) | -10.1 (1.2)       | -11.8 (1.5)          | 838         |
| <b>Divorce</b>                                               | -18.6 (5.8) | -14.1 (7.0) | -24.2 (6.0) | -15.1 (5.6)       | -15.6 (5.1)          | 55          |
| Tobacco use                                                  |             |             |             |                   |                      |             |
| <b>No</b>                                                    | -10.1 (0.4) | -11.4 (0.6) | -12.4 (0.5) | -9.8 (0.4)        | -10.5 (0.5)          | 12529       |
| <b>Yes</b>                                                   | -13.4 (0.8) | -15.5 (1.5) | -16.5 (1.2) | -11.1 (0.7)       | -12.6 (0.9)          | 3758        |
| Alcohol use                                                  |             |             |             |                   |                      |             |
| <b>No</b>                                                    | -10.6 (0.4) | -12.1 (0.6) | -13.1 (0.5) | -10.2 (0.4)       | -11.0 (0.5)          | 13911       |
| <b>Yes</b>                                                   | -10.6 (1.1) | -10.7 (2.0) | -11.4 (1.9) | -8.2 (1.0)        | -10.6 (1.2)          | 2376        |
| BMI                                                          |             |             |             |                   |                      |             |
| <b>Underweight</b>                                           | -10.6 (2.4) | -15.6 (5.1) | -15.4 (3.9) | -10.5 (2.9)       | -7.8 (4.8)           | 756         |
| <b>Normal weight</b>                                         | -10.6 (0.9) | -11.6(1.5)  | -13.6 (1.2) | -9.2 (0.9)        | -9.7 (1.2)           | 5278        |
| <b>Overweight</b>                                            | -10.3 (1.1) | -12.1 (1.2) | -11.6 (1.3) | -7.7 (0.9))       | -8.9 (1.2)           | 4190        |
| <b>Obesity</b>                                               | -7.4 (0.9)  | -9.9 (1.7)  | -11.4 (1.3) | -8.0 (0.9)        | -8.6 (1.4)           | 2249        |
| Diabetes                                                     |             |             |             |                   |                      |             |
| <b>Diabetes (diagnosed or self-reported)</b>                 | -10.0 (0.6) | -11.6 (1.1) | -11.6 (0.9) | -9.7 (0.6)        | -11.4 (0.8)          | 3676        |
| <b>Pre diabetes</b>                                          | -10.2 (0.6) | -13.5 (1.0) | -14.1 (0.8) | -9.4 (0.6)        | -10.6 (0.7)          | 5449        |
| <b>No diabetes</b>                                           | -10.9 (0.7) | -11.0 (1.2) | -12.6 (1.1) | -9.9 (0.7)        | -10.0 (0.8)          | 4610        |
| Hypertension                                                 |             |             |             |                   |                      |             |



|                                                |             |             |             |             |             |       |
|------------------------------------------------|-------------|-------------|-------------|-------------|-------------|-------|
| <b>Diagnosed or Self-reported hypertension</b> | -11.2 (0.6) | -14.7 (1.0) | -14.1 (0.8) | -10.8 (0.6) | -10.8 (0.7) | 5074  |
| <b>Pre hypertension</b>                        | -10.9 (0.7) | -12.4 (1.2) | -14.1 (1.0) | -9.7 (0.7)  | -11.2 (0.9) | 4717  |
| <b>No hypertension</b>                         | -9.3 (0.6)  | -9.6 (1.0)  | -10.4 (0.9) | -8.4 (0.6)  | -10.0 (0.7) | 5695  |
| Heart disease                                  |             |             |             |             |             |       |
| <b>No</b>                                      | -10.5 (0.3) | -11.9 (0.6) | -13.0 (0.5) | -9.9 (0.3)  | -10.7 (0.4) | 15842 |
| <b>Yes</b>                                     | -9.0 (1.6)  | -9.0 (2.5)  | -9.5 (1.9)  | -7.4 (1.7)  | -11.8 (2.0) | 445   |
| Stroke                                         |             |             |             |             |             |       |
| <b>No</b>                                      | -10.7 (0.3) | -11.9 (0.6) | -13.1 (0.5) | -10.0 (0.3) | -10.8 (0.4) | 16203 |
| <b>Yes</b>                                     | -13.7 (3.6) | -18.4 (4.4) | -19.2 (4.1) | -12.2 (3.5) | -16.3 (4.1) | 84    |
| Kidney disease                                 |             |             |             |             |             |       |
| <b>No</b>                                      | -10.7 (0.3) | -11.9 (0.6) | -13.1 (0.5) | -9.9 (0.3)  | -10.8 (0.4) | 16175 |
| <b>Yes</b>                                     | -11.6 (3.7) | -21.2 (4.8) | -14.3 (4.2) | -16.4 (3.2) | -16.3 (3.7) | 112   |

**NOTES:** Tobacco use, Heart disease, Kidney disease were based on self-reports, newly diagnosed diabetes - defined as no self-reported diabetes and fasting blood glucose (FBG) of  $\geq 126$  mg/dl, or HbA1c  $\geq 6.5\%$ ), pre-diabetes – no self-reported diabetes and FBG  $\geq 100$ -125 mg/dl or HbA1c  $\geq 5.7$ -6.4%), normoglycemia – no self-reported diabetes and FBG  $< 100$  mg/dl and HbA1c  $< 5.7\%$ , Newly diagnosed hypertension – defined as no self-reported hypertension and BP  $\geq 140/90$  mmHg, prehypertension - no self-reported hypertension and BP: 120-139 / 80-89 mmHg and normotensive - no history of hypertension and BP  $< 120/80$  mmHg. INR: Indian rupees, mmHg – millimeter of mercury, mg/dl - Milligram/deciliter; yrs – years; US\$ - United States Dollar

## Appendix 3 - The comparison of HRQOL as measured by EQ5D-VAS among different countries

| Countries, year of study                  | N      | EQ-VAS | Percentages with any difficulties in EQ5D domain |           |                  |                   |                      |               |
|-------------------------------------------|--------|--------|--------------------------------------------------|-----------|------------------|-------------------|----------------------|---------------|
|                                           |        |        | Mobility                                         | Self-care | Usual activities | Pain / Discomfort | Anxiety / Depression | Any dimension |
| India, Delhi (age $\geq$ 20), 2011        | 5,365  | 78.9   | 14.1                                             | 1.6       | 4.4              | 8.0               | 9.5                  | 27.8          |
| India, Chennai, (age $\geq$ 20), 2011     | 6,903  | 70.8   | 17.3                                             | 7.8       | 7.7              | 9.0               | 8.9                  | 29.7          |
| Pakistan (Karachi), (age $\geq$ 20), 2011 | 4,016  | 73.2   | 10.4                                             | 1.9       | 5.6              | 8.7               | 9.3                  | 17.9          |
| China (age $\geq$ 18), 2008               | 2,991  | 77.0   | 4.9                                              | 2.0       | 3.3              | 18.0              | 6.1                  | 22.4          |
| UK (age $\geq$ 18), 1998                  | 3395   | 82.5   | 18.4                                             | 4.2       | 16.3             | 33.0              | 20.9                 | 43.1          |
| USA (age $\geq$ 18), 1998                 | 427    | 82.2   | 14.0                                             | 3.0       | 14.0             | 40.0              | 24.0                 | na            |
| Japan (age $\geq$ 20), 1998               | 620    | 77.8   | 7.2                                              | 1.8       | 5.2              | 20.0              | 8.5                  | 25.0          |
| Spain (age $\geq$ 15), 1998               | 12,245 | 71.1   | 11.2                                             | 2.0       | 6.9              | 26.3              | 12.5                 | 33.0          |
| Canada (age $\geq$ 18), 1997              | 1518   | 78.7   | 22.2                                             | 4.0       | 19.1             | 43.6              | 28.6                 | 53.0          |
| Sweden (age $\geq$ 18), 1998              | 3069   | 83.5   | 10.0                                             | 2.0       | 8.0              | 42.0              | 30.0                 | na            |
| Finland (age $\geq$ 18), 1992             | 2411   | 79.4   | 20.0                                             | 5.0       | 18.0             | 39.0              | 14.0                 | na            |
| Germany (age $\geq$ 18), 1998             | 337    | 82.2   | 18.0                                             | 3.0       | 13.0             | 37.0              | 18.0                 | na            |
| Belgium (age $\geq$ 18), 2001             | 1274   | 81.0   | 13.0                                             | 3.0       | 15.0             | 42.0              | 21.0                 | na            |
| New Zealand (age $\geq$ 18), 1999         | 1328   | 81.3   | 17.0                                             | 4.0       | 18.0             | 37.0              | 20.0                 | na            |
| Zimbabwe (age $\geq$ 18), 2000            | 2350   | 76.1   | 20.0                                             | 7.0       | 18.0             | 41.0              | 40.0                 | na            |
| Armenia (age $\geq$ 18), 2002             | 2222   | 66.6   | 26.0                                             | 13.0      | 28.0             | 64.0              | 52.0                 | na            |

NOTES: EQ5D-VAS: European Quality of Life 5 Dimension – Visual Analogue Scale; na – not available

STROBE 2007 (v4) Statement—Checklist of items that should be included in reports of *cross-sectional studies*

| Section/Topic                | Item # | Recommendation                                                                                                                                                                       | Reported on page #                                                                  |
|------------------------------|--------|--------------------------------------------------------------------------------------------------------------------------------------------------------------------------------------|-------------------------------------------------------------------------------------|
| Title and abstract           | 1      | (a) Indicate the study's design with a commonly used term in the title or the abstract                                                                                               | 1, 6                                                                                |
|                              |        | (b) Provide in the abstract an informative and balanced summary of what was done and what was found                                                                                  | 6                                                                                   |
| <b>Introduction</b>          |        |                                                                                                                                                                                      |                                                                                     |
| Background/rationale         | 2      | Explain the scientific background and rationale for the investigation being reported                                                                                                 | 8,9                                                                                 |
| Objectives                   | 3      | State specific objectives, including any prespecified hypotheses                                                                                                                     | 9                                                                                   |
| <b>Methods</b>               |        |                                                                                                                                                                                      |                                                                                     |
| Study design                 | 4      | Present key elements of study design early in the paper                                                                                                                              | 9                                                                                   |
| Setting                      | 5      | Describe the setting, locations, and relevant dates, including periods of recruitment, exposure, follow-up, and data collection                                                      | 9                                                                                   |
| Participants                 | 6      | (a) Give the eligibility criteria, and the sources and methods of selection of participants                                                                                          | 9, 10                                                                               |
| Variables                    | 7      | Clearly define all outcomes, exposures, predictors, potential confounders, and effect modifiers. Give diagnostic criteria, if applicable                                             | 10                                                                                  |
| Data sources/<br>measurement | 8*     | For each variable of interest, give sources of data and details of methods of assessment (measurement). Describe comparability of assessment methods if there is more than one group | 10, 11                                                                              |
| Bias                         | 9      | Describe any efforts to address potential sources of bias                                                                                                                            | 12 ( <i>adjusted regression model was run to adjust for potential confounders</i> ) |
| Study size                   | 10     | Explain how the study size was arrived at                                                                                                                                            | Not applicable – secondary data analysis                                            |
| Quantitative variables       | 11     | Explain how quantitative variables were handled in the analyses. If applicable, describe which groupings were chosen and why                                                         | 12                                                                                  |

|    |                          |     |                                                                                                                                                                                                              |
|----|--------------------------|-----|--------------------------------------------------------------------------------------------------------------------------------------------------------------------------------------------------------------|
| 1  |                          |     |                                                                                                                                                                                                              |
| 2  |                          |     |                                                                                                                                                                                                              |
| 3  |                          |     |                                                                                                                                                                                                              |
| 4  | Statistical methods      | 12  | (a) Describe all statistical methods, including those used to control for confounding                                                                                                                        |
| 5  |                          |     |                                                                                                                                                                                                              |
| 6  |                          |     | (b) Describe any methods used to examine subgroups and interactions                                                                                                                                          |
| 7  |                          |     | (c) Explain how missing data were addressed                                                                                                                                                                  |
| 8  |                          |     | (d) If applicable, describe analytical methods taking account of sampling strategy                                                                                                                           |
| 9  |                          |     | (e) Describe any sensitivity analyses                                                                                                                                                                        |
| 10 |                          |     |                                                                                                                                                                                                              |
| 11 | <b>Results</b>           |     |                                                                                                                                                                                                              |
| 12 | Participants             | 13* | (a) Report numbers of individuals at each stage of study—eg numbers potentially eligible, examined for eligibility, confirmed eligible, included in the study, completing follow-up, and analysed            |
| 13 |                          |     |                                                                                                                                                                                                              |
| 14 |                          |     | (b) Give reasons for non-participation at each stage                                                                                                                                                         |
| 15 |                          |     | (c) Consider use of a flow diagram                                                                                                                                                                           |
| 16 |                          |     |                                                                                                                                                                                                              |
| 17 | Descriptive data         | 14* | (a) Give characteristics of study participants (eg demographic, clinical, social) and information on exposures and potential confounders                                                                     |
| 18 |                          |     |                                                                                                                                                                                                              |
| 19 |                          |     | (b) Indicate number of participants with missing data for each variable of interest                                                                                                                          |
| 20 |                          |     |                                                                                                                                                                                                              |
| 21 | Outcome data             | 15* | Report numbers of outcome events or summary measures                                                                                                                                                         |
| 22 |                          |     |                                                                                                                                                                                                              |
| 23 | Main results             | 16  | (a) Give unadjusted estimates and, if applicable, confounder-adjusted estimates and their precision (eg, 95% confidence interval). Make clear which confounders were adjusted for and why they were included |
| 24 |                          |     |                                                                                                                                                                                                              |
| 25 |                          |     | (b) Report category boundaries when continuous variables were categorized                                                                                                                                    |
| 26 |                          |     | (c) If relevant, consider translating estimates of relative risk into absolute risk for a meaningful time period                                                                                             |
| 27 |                          |     |                                                                                                                                                                                                              |
| 28 | Other analyses           | 17  | Report other analyses done—eg analyses of subgroups and interactions, and sensitivity analyses                                                                                                               |
| 29 |                          |     |                                                                                                                                                                                                              |
| 30 | <b>Discussion</b>        |     |                                                                                                                                                                                                              |
| 31 | Key results              | 18  | Summarise key results with reference to study objectives                                                                                                                                                     |
| 32 | Limitations              | 19  | Discuss limitations of the study, taking into account sources of potential bias or imprecision. Discuss both direction and magnitude of any potential bias                                                   |
| 33 |                          |     |                                                                                                                                                                                                              |
| 34 | Interpretation           | 20  | Give a cautious overall interpretation of results considering objectives, limitations, multiplicity of analyses, results from similar studies, and other relevant evidence                                   |
| 35 |                          |     |                                                                                                                                                                                                              |
| 36 | Generalisability         | 21  | Discuss the generalisability (external validity) of the study results                                                                                                                                        |
| 37 |                          |     |                                                                                                                                                                                                              |
| 38 | <b>Other information</b> |     |                                                                                                                                                                                                              |
| 39 | Funding                  | 22  | Give the source of funding and the role of the funders for the present study and, if applicable, for the original study on which the present article is based                                                |
| 40 |                          |     |                                                                                                                                                                                                              |
| 41 |                          |     |                                                                                                                                                                                                              |
| 42 |                          |     |                                                                                                                                                                                                              |
| 43 |                          |     |                                                                                                                                                                                                              |
| 44 |                          |     |                                                                                                                                                                                                              |
| 45 |                          |     |                                                                                                                                                                                                              |
| 46 |                          |     |                                                                                                                                                                                                              |
| 47 |                          |     |                                                                                                                                                                                                              |
| 48 |                          |     |                                                                                                                                                                                                              |
| 49 |                          |     |                                                                                                                                                                                                              |

1  
2  
3  
4 \*Give information separately for cases and controls in case-control studies and, if applicable, for exposed and unexposed groups in cohort and cross-sectional studies.  
5

6 **Note:** An Explanation and Elaboration article discusses each checklist item and gives methodological background and published examples of transparent reporting. The STROBE  
7 checklist is best used in conjunction with this article (freely available on the Web sites of PLoS Medicine at <http://www.plosmedicine.org/>, Annals of Internal Medicine at  
8 <http://www.annals.org/>, and Epidemiology at <http://www.epidem.com/>). Information on the STROBE Initiative is available at [www.strobe-statement.org](http://www.strobe-statement.org).  
9  
10  
11  
12  
13  
14  
15  
16  
17  
18  
19  
20  
21  
22  
23  
24  
25  
26  
27  
28  
29  
30  
31  
32  
33  
34  
35  
36  
37  
38  
39  
40  
41  
42  
43  
44  
45  
46  
47  
48  
49
