# Supplementary material for: Health-related quality of life variations by sociodemographic factors and chronic conditions in three metropolitan cities of South Asia: the CARRS study
Source: PubMed Central journal article supplement (PMC5652573; doi:10.1136/bmjopen-2017-018424), 2017-10-15
Supplement: bmjopen-2017-018424supp001.pdf [file bmjopen-2017-018424supp001.pdf]

## Web-appendix (supplementary file)

### Appendix 1: The distribution of the respondents EQ-VAS values

| EQ-VAS score | Number | Percentage (%) | Cum. Percentage (%) |
|--------------|--------|----------------|---------------------|
| 10-          | 29     | 0.18           | 0.18                |
| 20-          | 72     | 0.44           | 0.62                |
| 30-          | 88     | 0.54           | 1.16                |
| 40-          | 365    | 2.24           | 3.4                 |
| 50-          | 2,056  | 12.62          | 16.03               |
| 60-          | 1,979  | 12.15          | 28.18               |
| 70-          | 3,728  | 22.89          | 51.07               |
| 80-          | 4,026  | 24.72          | 75.78               |
| 90-          | 2,594  | 15.93          | 91.71               |
| 100-         | 1,350  | 8.29           | 100                 |

**Notes:** EQ-VAS: European Quality of Life – Visual Analogue Scale, Cum. Percentage – Cumulative percentage

## Appendix 2: Relationship between EQ-VAS and EQ5D across major sub-groups

| Dependent variable                                           | Mobility    | Self-care   | Usual care  | Pain / discomfort | Anxiety / Depression | Observation |
|--------------------------------------------------------------|-------------|-------------|-------------|-------------------|----------------------|-------------|
| Overall                                                      | -10.5 (0.6) | -9.9 (0.9)  | -12.4 (0.7) | -10.9 (0.6)       | -8.9 (0.8)           | 16287       |
| Gender                                                       |             |             |             |                   |                      |             |
| <b>Male</b>                                                  | -12.0 (0.6) | -11.4 (1.1) | -14.6 (0.9) | -11.9 (0.6)       | -12.1 (0.7)          | 7760        |
| <b>Female</b>                                                | -8.1 (0.4)  | -7.9 (0.7)  | -9.9 (0.6)  | -7.7 (0.4)        | -9.1 (0.5)           | 8527        |
| Age groups                                                   |             |             |             |                   |                      |             |
| <b>Young (20-44 yrs)</b>                                     | -9.9 (0.5)  | -11.0 (0.9) | -12.0 (0.8) | -8.8 (0.5)        | -9.3 (0.6)           | 9603        |
| <b>Middle (45-60 yrs)</b>                                    | -9.0 (0.5)  | -10.8 (0.9) | -11.3 (0.8) | -9.0 (0.5)        | -10.7 (0.6)          | 5544        |
| <b>Elderly (&gt;60 yrs)</b>                                  | -11.1 (1.0) | -11.7 (1.6) | -13.1 (1.3) | -11.0 (1.1)       | -13.2 (1.4)          | 1140        |
| Income                                                       |             |             |             |                   |                      |             |
| <b>Low income group (INR &lt;10000 or US\$ 155)</b>          | -10.6 (0.4) | -12.1 (0.7) | -13.2 (0.6) | -10.2 (0.4)       | -10.7 (0.5)          | 11537       |
| <b>Middle income group (INR 10000-20000 or US\$ 155-310)</b> | -10.2 (0.8) | -8.9 (1.6)  | -10.7 (1.3) | -9.2 (0.8)        | -11.8 (1.1)          | 2667        |
| <b>High income group (INR &gt;20000 or US\$&gt;310)</b>      | -12 (1.0)   | -14.4(2.5)  | -15.6 (1.7) | -10.5 (0.9)       | -8.2 (1.6)           | 1975        |
| Level of education                                           |             |             |             |                   |                      |             |
| <b>Up to primary school</b>                                  | -10.8 (0.6) | -12.8 (1.1) | -12.6 (0.8) | -9.9 (0.6)        | -11.6 (0.8)          | 3604        |
| <b>Secondary school</b>                                      | -9.9 (0.4)  | -11.1 (0.8) | -12.2 (0.7) | -9.3 (0.4)        | -10.2 (0.5)          | 9924        |
| <b>Graduation and above</b>                                  | -8.9 (1.0)  | -8.3 (2.1)  | -11.4 (1.8) | -9.8 (0.9)        | -8.3 (1.3)           | 2759        |
| Marital status                                               |             |             |             |                   |                      |             |
| <b>Single</b>                                                | -8.4 (1.9)  | -9.4 (3.8)  | -15.2 (3.3) | -9.0 (1.8)        | -10.8 (2.0)          | 1177        |
| <b>Married</b>                                               | -10.3 (0.4) | -11.5 (0.6) | -12.3 (0.5) | -9.5 (0.4)        | -10.3 (0.5)          | 14217       |
| <b>Widowed</b>                                               | -9.9 (1.2)  | -11.1 (1.8) | -12.9 (1.4) | -10.1 (1.2)       | -11.8 (1.5)          | 838         |
| <b>Divorce</b>                                               | -18.6 (5.8) | -14.1 (7.0) | -24.2 (6.0) | -15.1 (5.6)       | -15.6 (5.1)          | 55          |
| Tobacco use                                                  |             |             |             |                   |                      |             |
| <b>No</b>                                                    | -10.1 (0.4) | -11.4 (0.6) | -12.4 (0.5) | -9.8 (0.4)        | -10.5 (0.5)          | 12529       |
| <b>Yes</b>                                                   | -13.4 (0.8) | -15.5 (1.5) | -16.5 (1.2) | -11.1 (0.7)       | -12.6 (0.9)          | 3758        |
| Alcohol use                                                  |             |             |             |                   |                      |             |
| <b>No</b>                                                    | -10.6 (0.4) | -12.1 (0.6) | -13.1 (0.5) | -10.2 (0.4)       | -11.0 (0.5)          | 13911       |
| <b>Yes</b>                                                   | -10.6 (1.1) | -10.7 (2.0) | -11.4 (1.9) | -8.2 (1.0)        | -10.6 (1.2)          | 2376        |
| BMI                                                          |             |             |             |                   |                      |             |
| <b>Underweight</b>                                           | -10.6 (2.4) | -15.6 (5.1) | -15.4 (3.9) | -10.5 (2.9)       | -7.8 (4.8)           | 756         |
| <b>Normal weight</b>                                         | -10.6 (0.9) | -11.6(1.5)  | -13.6 (1.2) | -9.2 (0.9)        | -9.7 (1.2)           | 5278        |
| <b>Overweight</b>                                            | -10.3 (1.1) | -12.1 (1.2) | -11.6 (1.3) | -7.7 (0.9))       | -8.9 (1.2)           | 4190        |
| <b>Obesity</b>                                               | -7.4 (0.9)  | -9.9 (1.7)  | -11.4 (1.3) | -8.0 (0.9)        | -8.6 (1.4)           | 2249        |
| Diabetes                                                     |             |             |             |                   |                      |             |
| <b>Diabetes (diagnosed or self-reported)</b>                 | -10.0 (0.6) | -11.6 (1.1) | -11.6 (0.9) | -9.7 (0.6)        | -11.4 (0.8)          | 3676        |
| <b>Pre diabetes</b>                                          | -10.2 (0.6) | -13.5 (1.0) | -14.1 (0.8) | -9.4 (0.6)        | -10.6 (0.7)          | 5449        |
| <b>No diabetes</b>                                           | -10.9 (0.7) | -11.0 (1.2) | -12.6 (1.1) | -9.9 (0.7)        | -10.0 (0.8)          | 4610        |
| Hypertension                                                 |             |             |             |                   |                      |             |

|                                                |             |             |             |             |             |       |
|------------------------------------------------|-------------|-------------|-------------|-------------|-------------|-------|
| <b>Diagnosed or Self-reported hypertension</b> | -11.2 (0.6) | -14.7 (1.0) | -14.1 (0.8) | -10.8 (0.6) | -10.8 (0.7) | 5074  |
| <b>Pre hypertension</b>                        | -10.9 (0.7) | -12.4 (1.2) | -14.1 (1.0) | -9.7 (0.7)  | -11.2 (0.9) | 4717  |
| <b>No hypertension</b>                         | -9.3 (0.6)  | -9.6 (1.0)  | -10.4 (0.9) | -8.4 (0.6)  | -10.0 (0.7) | 5695  |
| Heart disease                                  |             |             |             |             |             |       |
| <b>No</b>                                      | -10.5 (0.3) | -11.9 (0.6) | -13.0 (0.5) | -9.9 (0.3)  | -10.7 (0.4) | 15842 |
| <b>Yes</b>                                     | -9.0 (1.6)  | -9.0 (2.5)  | -9.5 (1.9)  | -7.4 (1.7)  | -11.8 (2.0) | 445   |
| Stroke                                         |             |             |             |             |             |       |
| <b>No</b>                                      | -10.7 (0.3) | -11.9 (0.6) | -13.1 (0.5) | -10.0 (0.3) | -10.8 (0.4) | 16203 |
| <b>Yes</b>                                     | -13.7 (3.6) | -18.4 (4.4) | -19.2 (4.1) | -12.2 (3.5) | -16.3 (4.1) | 84    |
| Kidney disease                                 |             |             |             |             |             |       |
| <b>No</b>                                      | -10.7 (0.3) | -11.9 (0.6) | -13.1 (0.5) | -9.9 (0.3)  | -10.8 (0.4) | 16175 |
| <b>Yes</b>                                     | -11.6 (3.7) | -21.2 (4.8) | -14.3 (4.2) | -16.4 (3.2) | -16.3 (3.7) | 112   |

**NOTES:** Tobacco use, Heart disease, Kidney disease were based on self-reports, newly diagnosed diabetes - defined as no self-reported diabetes and fasting blood glucose (FBG) of  $\geq 126$  mg/dl, or HbA1c  $\geq 6.5\%$ ), pre-diabetes – no self-reported diabetes and FBG  $\geq 100$ -125 mg/dl or HbA1c  $\geq 5.7$ -6.4%), normoglycemia – no self-reported diabetes and FBG  $< 100$  mg/dl and HbA1c  $< 5.7\%$ , Newly diagnosed hypertension – defined as no self-reported hypertension and BP  $\geq 140/90$  mmHg, prehypertension - no self-reported hypertension and BP: 120-139 / 80-89 mmHg and normotensive - no history of hypertension and BP  $< 120/80$  mmHg. INR: Indian rupees, mmHg – millimeter of mercury, mg/dl - Milligram/deciliter; yrs – years; US\$ - United States Dollar

**Appendix 3 - The comparison of HRQOL as measured by EQ5D-VAS among different countries**

| Countries, year of study                  | N      | EQ-VAS | Percentages with any difficulties in EQ5D domain |           |                  |                   |                      |               |
|-------------------------------------------|--------|--------|--------------------------------------------------|-----------|------------------|-------------------|----------------------|---------------|
|                                           |        |        | Mobility                                         | Self-care | Usual activities | Pain / Discomfort | Anxiety / Depression | Any dimension |
| India, Delhi (age $\geq$ 20), 2011        | 5,365  | 78.9   | 14.1                                             | 1.6       | 4.4              | 8.0               | 9.5                  | 27.8          |
| India, Chennai, (age $\geq$ 20), 2011     | 6,903  | 70.8   | 17.3                                             | 7.8       | 7.7              | 9.0               | 8.9                  | 29.7          |
| Pakistan (Karachi), (age $\geq$ 20), 2011 | 4,016  | 73.2   | 10.4                                             | 1.9       | 5.6              | 8.7               | 9.3                  | 17.9          |
| China (age $\geq$ 18), 2008               | 2,991  | 77.0   | 4.9                                              | 2.0       | 3.3              | 18.0              | 6.1                  | 22.4          |
| UK (age $\geq$ 18), 1998                  | 3395   | 82.5   | 18.4                                             | 4.2       | 16.3             | 33.0              | 20.9                 | 43.1          |
| USA (age $\geq$ 18) , 1998                | 427    | 82.2   | 14.0                                             | 3.0       | 14.0             | 40.0              | 24.0                 | na            |
| Japan (age $\geq$ 20) , 1998              | 620    | 77.8   | 7.2                                              | 1.8       | 5.2              | 20.0              | 8.5                  | 25.0          |
| Spain (age $\geq$ 15) , 1998              | 12,245 | 71.1   | 11.2                                             | 2.0       | 6.9              | 26.3              | 12.5                 | 33.0          |
| Canada (age $\geq$ 18), 1997              | 1518   | 78.7   | 22.2                                             | 4.0       | 19.1             | 43.6              | 28.6                 | 53.0          |
| Sweden (age $\geq$ 18), 1998              | 3069   | 83.5   | 10.0                                             | 2.0       | 8.0              | 42.0              | 30.0                 | na            |
| Finland (age $\geq$ 18), 1992             | 2411   | 79.4   | 20.0                                             | 5.0       | 18.0             | 39.0              | 14.0                 | na            |
| Germany (age $\geq$ 18), 1998             | 337    | 82.2   | 18.0                                             | 3.0       | 13.0             | 37.0              | 18.0                 | na            |
| Belgium (age $\geq$ 18), 2001             | 1274   | 81.0   | 13.0                                             | 3.0       | 15.0             | 42.0              | 21.0                 | na            |
| New Zealand (age $\geq$ 18), 1999         | 1328   | 81.3   | 17.0                                             | 4.0       | 18.0             | 37.0              | 20.0                 | na            |
| Zimbabwe (age $\geq$ 18), 2000            | 2350   | 76.1   | 20.0                                             | 7.0       | 18.0             | 41.0              | 40.0                 | na            |
| Armenia (age $\geq$ 18), 2002             | 2222   | 66.6   | 26.0                                             | 13.0      | 28.0             | 64.0              | 52.0                 | na            |

**NOTES:** EQ5D-VAS: European Quality of Life 5 Dimension – Visual Analogue Scale; na – not available
